## Transcriptional Architecture of Synaptic Communication Delineates Cortical GABAergic Neuron Identity

Anirban Paul, Megan Crow, Ricardo Raudales, Jesse Gillis, Z. Josh Huang \*  
One Bungtown Road, Cold Spring Harbor Laboratory,  
Cold Spring Harbor, New York 11724, USA

\*corresponding and lead author

**Contact Information:**

Anirban Paul: paula@cshl.edu

Megan Crow: mcrow@cshl.edu

Ricardo Raudales: rraudale@cshl.edu

Jesse Gillis: jgillis@cshl.edu

Z. Josh Huang: huangj@cshl.edu

## 1 **Abstract**

2 Understanding the organizational logic of neural circuits requires deciphering the biological  
3 basis of neuron type diversity and identity, but there is no consensus on defining a neuron type.  
4 We analyzed single cell transcriptomes of anatomically and physiologically characterized  
5 cortical ground truth populations and conducted a computational genomic screen for  
6 transcription profiles that distinguish them. We discovered that cardinal GABAergic neuron  
7 types are delineated by a transcriptional architecture that encodes their synaptic communication  
8 patterns. This architecture comprises 6 categories of ~40 gene families including cell adhesion  
9 molecules, transmitter-modulator receptors, ion channels, signaling proteins, neuropeptides and  
10 vesicular release components, and transcription factors. Combinatorial expression of select  
11 members across families shapes a multi-layered molecular scaffold along cell membrane that  
12 may customize synaptic connectivity patterns and input-output signaling properties. This  
13 molecular genetic framework of neuronal identity integrates cell phenotypes along multiple axes  
14 and provides a foundation for discovering and classifying neuron types.

## 1 INTRODUCTION

2 Since the discovery that individual neurons are basic building blocks of the nervous system  
3 (Cajal, 1892), the immense diversity and heterogeneity of nerve cells have remained a  
4 formidable challenge for deciphering the organizational logic of neural circuits (Armananzas and  
5 Ascoli, 2015; Bota and Swanson, 2007). Recent technical advances have accelerated progress in  
6 anatomical, physiological, developmental and functional studies that increasingly reveal multi-  
7 layered and multi-dimensional variations of neuronal phenotypes and properties (Huang and  
8 Zeng, 2013; Luo et al., 2008). A fundamental question of broad significance is whether these  
9 variations are continuous, largely subjective to measurements, and can only be managed by  
10 empirical and operational grouping, or whether multiple distinct and congruent cell features can  
11 be integrated to define and classify discrete “cells types” that reflect biological reality and  
12 mechanisms (DeFelipe et al., 2013; Seung and Sumbul, 2014). The problem of neuronal  
13 diversity and census are unlikely to be solved without solving the equally if not more  
14 fundamental problem of neuronal identity, the flip side of the cell type coin (Seung and Sumbul,  
15 2014). However, in many brain regions, such as the cerebral cortex, there is no consensus on  
16 what a neuron type is; the biological basis of neuronal identity is poorly understood and the  
17 classification scheme of cell types remain contentious (Battaglia et al., 2013; DeFelipe et al.,  
18 2013; Petilla Interneuron Nomenclature et al., 2008).

19  
20 As individual neurons also constitute basic units of gene regulation in the brain, a major  
21 determinant of each neuron’s characteristic phenotype and function likely lies in its transcription  
22 program, shaped by its chromatin landscape customized from the genome. Recent advances  
23 enable mRNA sequencing of individual cells (Tang et al., 2009), and several studies have aimed  
24 to discover and classify neuron types using high-throughput single cell RNAseq (scRNAseq) and  
25 statistical clustering (Macosko et al., 2015; Tasic et al., 2016; Usoskin et al., 2015; Zeisel et al.,  
26 2015). A major challenge has been to map transcriptome-based statistical cell clusters, which are  
27 prone to technical noise and methodological bias, to the biological ground truth of cell types -  
28 their anatomical and physiological properties that constrain and contribute to their function in  
29 neural circuits. In the retina, where cell types are among the best understood in the mammalian  
30 nervous system, high throughput scRNAseq has identified transcriptionally distinct cell  
31 population markers that correlate to known types and suggested novel candidate types (Macosko  
32 et al., 2015; Shekhar et al., 2016). In the cerebral cortex, where cell type definition is often  
33 ambiguous and controversial, scRNAseq analyses have parsed cells into multiple “transcriptional  
34 types” (Tasic et al., 2016; Zeisel et al., 2015), but the boundaries of such statistical types often  
35 appear fluidic if not problematic, and the extent to which they correlate to bona-fide biological  
36 types jointly defined by anatomical and physiological features remain unclear. Thus although  
37 scRNAseq allows comprehensive, quantitative and high throughput measurements of gene  
38 expression, a fundamental unresolved issue is whether and how transcription profiles might  
39 contribute to the molecular genetic root of neuron types. Discovering such transcriptional basis  
40 of neuronal identity is prerequisite for using a transcriptome-based approach to decipher  
41 neuronal diversity and enumerate cell census.

42

1 Beyond cell type discovery and classification, a major promise of transcriptome analysis is to  
2 uncover the molecular mechanisms that underlie multi-faceted yet functionally congruent cell  
3 phenotypes and properties. Although an increasing set of molecular markers have been identified  
4 for different cell populations (Shekhar et al., 2016; Tasic et al., 2016; Zeisel et al., 2015),  
5 comprehensive and high-resolution molecular portraits that mechanistically and coherently  
6 explain and predict cell phenotypes have yet to be achieved.

7  
8 Here, we have discovered the transcription architecture underlying the core identity of cardinal  
9 GABAergic neuron types in the cerebral cortex. Unlike several recent studies that classify  
10 neurons using unsupervised statistical clustering of single cell transcriptomes from unbiased  
11 populations (Zeisel et al., 2015) or relatively broad populations (Tasic et al., 2016), we analyzed  
12 the transcriptomes of ~530 GABAergic neurons in mature mouse neocortex derived from 6  
13 cardinal types or subpopulations and that were captured by intersectional or lineage-based  
14 genetic labeling. Using these anatomy and physiology defined ground truth populations as an  
15 assay, we designed a supervised and machine learning-based computational genomics strategy to  
16 screen through each of the ~620 HGNC (Human Genome Nomenclature Committee) annotated  
17 gene families for those whose differential expression among family members reliably distinguish  
18 these subpopulations. Remarkably, approximately 40 gene families implicated in regulating  
19 synaptic connectivity and communication best distinguish these subpopulations. These gene  
20 families constitute 6 functional categories that include cell adhesion molecules, neurotransmitter  
21 and modulator receptors, ion channels, membrane-proximal signaling molecules, neuropeptides  
22 and vesicular release components, and transcription factors. Combinatorial and coordinated  
23 expression of select family members across functional categories shapes a multi-layered  
24 molecular scaffold along the cell membrane that appears to customize the pattern and property of  
25 synaptic communication for each cell population. We further provide evidence that expression  
26 profiles of transcription factors register the developmental history of GABAergic neurons and  
27 contribute to the concerted gene expression patterns that shape cell phenotypes. These findings  
28 suggest that neuron type identity is encoded in a transcriptional architecture that orchestrates  
29 functionally congruent expression across multiple gene families to diversify and customize the  
30 patterns and properties of synaptic communication. This overarching and mechanistic definition  
31 of neuron type integrates, explains and predicts cell phenotypes along multiple axes and provides  
32 an intellectual framework for neuron type discovery and classification in the nervous system.

## 33 **RESULTS**

### 34 **Single cell transcriptomes of ground truth GABAergic cell types and** 35 **subpopulations**

36 Our overall strategy in exploring the molecular basis underlying cortical GABAergic neuron  
37 identity is to examine and compare high resolution transcription profiles of a set of well  
38 characterized cell types or subpopulations defined by multiple anatomical, physiological and  
39 developmental attributes (He et al., 2016; Taniguchi et al., 2011). Cortical GABAergic neurons  
40 can be parsed into several broad classes, non-overlapping populations and, in a few cases, bona-  
41 fide types based on developmental origin, innervation targets, and molecular markers (Kepecs

1 and Fishell, 2014; Somogyi et al., 2014). The embryonic medial and caudal ganglionic  
2 eminences (MGE and CGE) give rise to two broad groups, the former is divided into  
3 parvalbumin (PV) and somatostatin (SST) populations and the latter is marked by 5HTR3a  
4 (Rudy et al., 2011) (Figure 1A-B). The PV population includes fast-spiking basket cells (PVBC)  
5 that innervate the perisomatic region (Hu et al., 2014) and chandelier cells (ChC) that target the  
6 axon initial segment (AIS) (Somogyi, 1977; Taniguchi et al., 2013). The SST population  
7 includes Martinotti cells (MNC) that target distal dendrites (Wang et al., 2004), long projection  
8 cells (LPC) (Tamamaki and Tomioka, 2010) and multiple other cell types. The 5HTR3a group  
9 includes the Vasoactive intestinal peptide (VIP) and Reelin populations, and the VIP population  
10 comprises interneuron-selective dis-inhibitory cells (ISC) (Pi et al., 2013; Staiger et al., 2004),  
11 Cholecystikinin (CCK) small basket cells (CCKC) (Armstrong and Soltesz, 2012; Freund and  
12 Katona, 2007) and likely additional cell types. Accumulated anatomical, physiological, and  
13 molecular evidence indicate that these are non-overlapping subpopulations, and ChC, LPC and  
14 PVC are considered cardinal types (He et al., 2016).

15  
16 We have developed combinatorial Cre and Flp recombinase driver lines to capture 6 GABAergic  
17 subpopulations and cell type through the activation of Ai14 or Ai65 reporters that express the  
18 fluorescent protein tdTomato (RFP) (He et al., 2016; Taniguchi et al., 2011): 1) The *Nkx2.1-  
19 CreER* driver allows lineage and birth timing based targeting of ChCs, 2) the *PV-Cre* driver  
20 labels a broad class of fast-spiking basket cells, 3) the *SST-Flp;nNOS-CreER* drivers target a  
21 highly unique type of long-projecting GABAergic neurons, 4) the *SST-Flp;CR-Cre* drivers  
22 include Martinotti cells and likely other cell types, 5) the *VIP-Flp;CR-Cre* drivers include  
23 interneuron-selective cells and likely other cell types, 6) the *VIP-Flp;CCK-Cre* drivers include  
24 CCK basket cells and likely other cell types. Together, we define these 6 populations as Ground  
25 Truth Populations, or GTPs.

26  
27 Using manual sorting (Paul et al., 2012; Sugino et al., 2006) of single RFP-labeled cells from  
28 microdissected motor and somatosensory cortical slices from mature (6 weeks old) mice (Figure  
29 1C), we obtained high depth transcriptome of ~584 cells from the 6 GTPs (Figure S1D; see  
30 Materials and Methods). This unique dataset thus contains high-resolution transcriptomes of  
31 phenotype-defined cortical GABAergic GTPs. Compared with previous 6bp UMI-based method  
32 (1.8-4.7K genes, (Zeisel et al., 2015) and non-UMI RPKM based readouts (7.2K genes, (Tasic et  
33 al., 2016), our method of manual sorting coupled with linear amplification (Eberwine et. al.  
34 1992) with 10bp UMIs improved single cell gene detection and quantification (~10K genes;  
35 Figure S1H). Compared with DropSeq which allows vast throughput at low cost (Macosko et al.,  
36 2015), our complementary approach achieves more comprehensive and quantitative  
37 transcriptome measurement of targeted cell populations, which facilitates more in-depth analysis  
38 of molecular profiles that may contribute to cell phenotypes and identity.

39  
40 Differential expression (DE) analysis revealed 190 genes that were differentially  
41 expressed among GTPs with each single cell expressing >50uTPM, >4 folds enrichment and  
42 with p-value <  $5 \times 10^{-4}$  (Figure 1D and TableS1). We detected between 26-91 DE genes for each  
43 GTP population. A subset of these DE genes is shown in Figure 1F as single cell barplots. We

1 confirmed the expression of multiple known markers for MGE (Lhx6, Sox6, and Satb1) and  
2 CGE (Htr3a, Nr2f2, and Prox1) derived interneurons and all markers used for combinatorial  
3 targeting matched perfectly to appropriate cell populations (Figure 1E), validating our method  
4 and dataset. To explore the laminar distinction of GTPs, we profiled *Nkx2.1-CreER* labeled ChCs  
5 from upper (L1-L2 boundary, CHC1) and deeper (L5+6, CHC2) layer cohorts. Although CHC1  
6 and CHC2 transcriptomes were highly similar, we detected ~11 genes that were enriched in  
7 CHC2 (Figure 1 D and F). We validated the GTP specific expression of ~10 selected transcripts  
8 using fluorescent double mRNA in-situ hybridization in appropriate driver lines in which a GTP  
9 can be detected with a RFP mRNA in situ probe (Figure 1G and Figure S2A). In particular, we  
10 discovered a putative pan-CHC transcript *Pthlh*: ~95% of Ai14-labeled CHCs were positive for  
11 *Pthlh* (136/143 cells) and their laminar distribution recapitulate ChC pattern in adult frontal  
12 cortex (Taniguchi et al., 2013) (Figure 1G, Figure S2A).

13

14 Previous DE analyses often reveal molecular markers that, although useful, appear piece meal  
15 and do not readily inform or explain cell properties (Tasic et al., 2016; Zeisel et al., 2015). To  
16 systematically examine the relationship between differential gene expression and cell  
17 phenotypes, we analyzed whether and how functional gene ensembles (e.g. gene families) relate  
18 to cellular properties of GTPs.

## 19 **A computation genomic screen identifies gene families and categories that** 20 **distinguish and characterize GTPs**

21 Cellular properties (e.g. fast spiking) emerge from operations of macromolecular machineries  
22 (e.g. sodium and potassium channel complexes consisting of multiple interacting core subunits,  
23 auxiliary subunits, scaffolding proteins); each component is often implemented as one of  
24 multiple variants encoded by a gene family (e.g. I of 9 members in the Nav family). Thus  
25 variations of cell properties (e.g. spike width) among cell types often result from differential  
26 usage or expression levels of select members (e.g. Nav.1 vs Nav1.6) with characteristic  
27 biochemical and biophysical properties that confer customized properties to modular cellular  
28 machines (Hartwell et al., 1999). Given the highly distinct and well-characterized anatomical and  
29 physiological features among GTPs, we hypothesized that these phenotypic differences result  
30 from systematic and coherent transcriptional differences across multiple gene families of  
31 different functional categories, much beyond a piece meal set of serendipitous markers. The  
32 unique strength of our experimental design, whereby single cell transcriptomes derive from 6  
33 GTPs, provided a powerful *assay* to systematically *screen* for such functional gene ensembles  
34 that distinguish and characterize GTPs. To efficiently and comprehensively identify such gene  
35 families, we designed a supervised, machine learning based algorithm, MetaNeighbour (Crow et  
36 al. 2017), to screen all the Gene Ontology (GO) terms and all the ~620 annotated gene families.

37

38 The essence of our computational genomics screen is to detect whether a given set of genes (e.g.  
39 gene families) shows preferentially correlated expression among cells known to possess the same  
40 identity (Figure 2A). Because our single cell transcriptomes derive from 6 GTPs, this data  
41 structure allowed us to characterize the similarity between all pairs of single cells using co-  
42 variation of expression level in many known gene sets and measure whether a given gene set  
43 correctly links cells of known identity. In a network formalism, each cell is a node and cells are

1 linked as probabilistically related based on the similarity (correlation) of their transcriptional  
2 profiles across a given set of genes (Figure 2A). This network can be used to classify cells based  
3 on their proximity within it: cells which are close within the network are predicted to share an  
4 identity (see Methods). A subset of the GTP labels are applied to cells, giving a sub-network of  
5 cells with known identities which can classify unlabeled cells. We then hold back the GTP  
6 identity of some cells (cross-validation) and attempt to predict their identities using this sub-  
7 network of known identities. A cell is predicted to have a given identity if its neighboring cells  
8 (grouped by similarity in their gene set expression) belong to a sub-network that defines that  
9 identity (Figure 2A). We report on the efficacy of this test using mean area under the receiver  
10 operator characteristic curve (AUROC), which maps to the probability that the assignment is  
11 correct, if it was making a single binary (positive/negative) choice (Figure 2A). Having  
12 constructed a computational assay for cell identity, we vary the transcriptomic features (e.g. gene  
13 families) used to characterize cells as neighbors of one another. This computation screen thus  
14 selects functional gene ensemble features (e.g. gene families) which jointly distinguish cell  
15 identities. We perform a stratified cross-validation which allows us to explicitly block technical  
16 sources of variation in single-cell analysis (see Methods), in close parallel to our meta-analytic  
17 evaluation of single-cell data (Crow, 2016).

18  
19 We first screened for gene ensembles according to GO terms, using both randomized labels  
20 (AUROC~0.5) and randomized gene sets as controls. Among the GO terms, those containing the  
21 keyword “synaptic” gave the highest AUROC score ranging between 0.91-0.98, suggesting that  
22 genes implicated in synaptic connectivity and function are most discriminating for GTPs (Figure  
23 2B, Table S3). Although informative, GO terms are too broad and redundant for describing  
24 neuronal phenotypes and properties. To identify more specific and extensive gene categories, we  
25 screened through all gene families annotated in the Human Genome Nomenclature (HGNC)  
26 database (see Methods). We identified ~40 gene families (i.e. 7% of all gene families) with  
27 AUROC scores >0.75, generally regarded as a stringent threshold (Figure 2C, Table S4).  
28 Strikingly, these gene families all fell into only 6 functional categories (Figure 2C-D): 1) cell  
29 adhesion molecules, 2) receptors for neurotransmitters and modulators, 3) voltage-gated ion  
30 channels, 4) regulatory signaling proteins, 5) neuropeptides and vesicle release machinery, 6)  
31 transcription factors. It is immediately evident from this list that except transcription factors  
32 (TFs), all other gene categories encode proteins that localize along or close to cell and synaptic  
33 membrane (Figure 2D) and contribute to a singular aspect of neuronal biology - synaptic  
34 communication, which is implemented through synaptic connectivity and input-output signaling  
35 properties (Figure 2E).

36  
37 To validate this discovery, we applied the MetaNeighbour screen to two independent scRNAseq  
38 datasets from equivalent cell populations (Tasic et al., 2016; Zeisel et al., 2015). Despite notable  
39 differences in experimental design, RNA amplification, library construction and mapped read  
40 tallying, our meta-analysis (Crow, 2016) of the combined dataset from the three studies validated  
41 all of our ground truth populations and 46% of the published data (18/39 transcriptional types:  
42 7/16 from Zeisel et al., 2015 and 11/23 from Tasic et al., 2016) (Figure 2F). More importantly,  
43 we found nearly identical results on the rank order of gene families that best discriminate

1 equivalent cell populations (i.e. 6 GTPs) in the three dataset, and the AUROC values of all the  
2 GTP-distinguishing gene families (Figure 2C) were well correlated in pair wise comparisons  
3 even though the scores from the other two datasets were modestly lower (Figure 2F).

4  
5 Together, our results indicate that, among the ~20,000 protein-coding genes constituting ~620  
6 gene families in mouse genome (442 HGNC families with 3 or more members were analyzed),  
7 GABAergic GTPs can be effectively distinguished by a small fraction of ~40 families  
8 constituting 6 functional categories. These gene categories appear to construct a coherent  
9 transcriptional architecture encoding a 5-layered molecular scaffold along the cell membrane that  
10 organizes and customizes synaptic connectivity and input-output signaling. This result thus  
11 suggests that the core identity of GABAergic neurons might be encrypted in key transcription  
12 features that coordinate two fundamental cell attributes – the pattern and style of synaptic  
13 communication.

14  
15 In the following sections, we examine each of the 6 gene categories and demonstrate how  
16 coordinated expression of select members across families and categories correlate with,  
17 contribute to and predict cell phenotypes and properties that together shape the identities of  
18 GTPs.

### 19 **Differential expression of cell adhesion molecules and carbohydrate** 20 **modifying enzymes among GTPs suggests large capacity for cell surface and** 21 **extracellular matrix labels**

22 Each GABAergic neuron receives hundreds to thousands of inputs from diverse presynaptic  
23 neurons and in turn contacts similar number of postsynaptic neurons of multiple types (Figure  
24 2A). These synaptic connections are established between specific cell types and at designated  
25 subcellular locations (i.e. wiring specificity) (Huang et al., 2007) and are further customized in  
26 their transmission properties for specific pre- and post-synaptic partners (i.e. synapse specificity)  
27 (de Wit and Ghosh, 2016). Classic studies have postulated a large set of “individual  
28 identification tags” on cell surface that allow neurons to distinguish one another and selectively  
29 connect to appropriate partners (Sperry, 1945). Studies in past decades have identified dozens of  
30 gene families encoding hundreds of neuronal cell adhesion molecules (CAMs) and synaptic  
31 adhesion molecules, some with thousands of splice variants, suggesting a molecular basis for the  
32 capacity and diversity of cell surface tags (Figure 2B) (de Wit and Ghosh, 2016; Kolodkin and  
33 Tessier-Lavigne, 2011). Through combinatorial ligand-receptor signaling, these CAMs play  
34 specific and overlapping roles during neural circuit assembly, including axon guidance, neurite  
35 branching and pruning, cellular and subcellular recognition, synapse formation and specificity,  
36 synapse property and plasticity. It is unclear to what extent these same adhesion molecules are  
37 reused in mature neurons to maintain cell morphology and connectivity, and to regulate synaptic  
38 transmission and plasticity. In particular, the repertoires of CAMs expressed in specific cell types  
39 in mature circuits are unknown (de Wit and Ghosh, 2016).

40  
41 Our computation genomics screens identified multiple CAM gene families that effectively  
42 discriminate GTPs (Figure 2D-E). Based on these broadly annotated HGNC families (total of  
43 ~660 genes) and neurobiology literature (de Wit and Ghosh, 2016; Kolodkin and Tessier-



1 Lavigne, 2011; Takahashi and Craig, 2013), we selected a set of ~275 genes encoding all major  
2 neuronal CAMs and organized them into 12 adhesion groups according to sequence homology  
3 and receptor-ligand relationships (Figure 3B; Table S5; See Methods and Supplemental Text).  
4 Notably, nearly all major groups of neuronal CAMs implicated in different aspects of neuronal  
5 development are expressed in GTPs, and each GTP on average expresses ~200 genes encoding  
6 CAMs (Figure 3C). This was an underestimate of CAM diversity as our RNAseq method does  
7 not detect splicing variants. Among the total ~275 neuronal CAM genes, 130 show highly  
8 distinct subpopulation profiles (Figure 3E, TableS2). Strikingly, multiple CAM families each  
9 manifests differential expression among GTPs (Figure 3F).

10  
11 For example, the Netrins mediate attractive interaction through DCC receptors and repulsive  
12 interaction through UNC5 family members, and the Slits regulate axon branching and mediate  
13 repulsive actions through the ROBO receptors (Kolodkin and Tessier-Lavigne, 2011; Wang et  
14 al., 1999). We found that different UNC5 members are expressed in ChC, SST/nNOS, SST/CR,  
15 VIP/CR cells. Double fluorescence mRNA in situ confirmed that UNC5b is highly specific to  
16 ChCs (Figure S2B). Furthermore, *Unc5a*, *5c*, *5d* and their ligand *netrin1* are differentially  
17 expressed among GTPs. These receptor-ligand pairs might mediate cell-cell recognition (e.g.  
18 attraction or repulsion) (Figure S3A). On the other hand, *Slit2* and *3* are highly enriched in PV  
19 cells and might contribute to the exuberant axon terminal branching that characterizes their  
20 “basket-like” morphology. In addition, ~20 immunoglobulin cell adhesion molecule (IgCAMs)  
21 are differentially expressed (Figure 3F; Supplemental Text 1a) and may contribute to the cellular,  
22 subcellular and synaptic specificity among GTPs. Among them, *CHL1* is particularly enriched in  
23 SST/CR population which includes dendrite-targeting Martinotti cells, consistent with its role in  
24 regulating subcellular synapse specificity (Ango et al., 2008).

25  
26 Among synaptic adhesion molecules, the neurexin (NRXs) and neuroligin (NLGs) are key pre-  
27 and post- synaptic organizers and regulate synaptic assembly and transmission properties  
28 through interaction with their associated proteins (Sudhof, 2008). Protein tyrosine phosphatases  
29 (PTPs) represent another crucial set of presynaptic organizers (Takahashi and Craig, 2013). On  
30 the postsynaptic side, a large family of leucine rich repeat proteins (LRRs), including LRR  
31 transmembrane proteins (LRRTMs) and *Slitrks*, interact with presynaptic RPTPs and NRXs to  
32 regulate synapse diversity, specificity and plasticity (de Wit and Ghosh, 2014). We found that  
33 each of these synaptic adhesion families is differentially expressed among GTPs (Figure 3F).  
34 Notably, each GTP enriches for a different set of 6-12 LRR proteins (Figure 3F). Among these,  
35 *Elfn1* is prominently enriched in SST/CR cells (Figure 3F). *Elfn1* is also enriched hippocampal  
36 O-LM interneurons - a homologue of cortical Martinotti cells contained within the SST/CR  
37 population, and contributes to the synaptic facilitation of glutamatergic transmission onto O-LM  
38 cell (Sylwestrak and Ghosh, 2012), a property also shared by Martinotti cells (Silberberg and  
39 Markram, 2007). Cell specific expression of LRRs might contribute to post- and trans-synaptic  
40 specializations that customize the property of synapse types defined by pre- and post-synaptic  
41 neuron identities.

42

1 We further discovered prominent differential expression in two families of carbohydrate  
2 modifying enzymes that may increase the molecular diversity of glycosylated CAMs and  
3 proteoglycans on cell membrane and in extracellular matrix (Figure 3F; Figure S3B; see  
4 Supplemental Text 1b).

5  
6 Together, our results suggest that transcription profiles of GABAergic neurons encode molecular  
7 mechanisms to diversify and specify not only their cell membrane but also extracellular milieu.  
8 Each GTP might produce a characteristic cell coat through distinct carbohydrate modification  
9 patterns to diversify proteoglycans that facilitates or prevents cell interaction at a distance.  
10 Further, nearly all families of adhesion molecules that regulate circuit development maintain  
11 expression in mature neurons, and almost every family shows substantial differential expression  
12 among GTPs. These adhesion families likely constitute a comprehensive mosaic of multi-faceted  
13 cell surface code throughout the neuronal membrane. Cell specific alternative mRNA splicing  
14 and post-translational glycosylation through carbohydrates and sulfation patterns will further  
15 increase the diversity, specificity and flexibility of this cell surface code.

## 16 **Differential expression of transmitter and modulator receptors shapes input** 17 **properties of GTPs**

18 Cortical GABAergic neurons received a large variety of extracellular inputs mediated by  
19 neurotransmitters, modulators, hormones and cell contacts that exert their actions through three  
20 broad classes of surface receptors: ligand-gated ion channels, G-protein coupled receptors, and  
21 enzyme-coupled receptors (e.g. receptor tyrosine kinases and phosphatases). Each class contains  
22 dozens to hundreds of receptors encoded by multiple gene families (Luo, 2016). Each receptor is  
23 characterized by unique ligand binding specificity, biophysical and biochemical properties,  
24 signaling properties, and subcellular localization. This broad receptor repertoire endows neurons  
25 with the large capacity to detect and transduce multiple extracellular signals with appropriate  
26 specificity and flexibility. We found that nearly every receptor family in each broad class is  
27 differentially expressed among GTPs (Figure 4).

## 28 **Ionotropic glutamate receptors (iGluRs)**

29 Ionotropic glutamate receptors (iGluRs) play key roles in excitatory synaptic signaling and  
30 plasticity and include: AMPA (GluA1–4), NMDA (GluN1, GluN2A–D, GluN3A–B), and kainite  
31 (GluK1–5) receptors (Traynelis et al., 2010). The basic biophysical properties of iGluRs are  
32 determined by their tetrameric pore-forming subunits, shaped by subunit composition, alternative  
33 splicing and RNA editing. Despite progress in understanding the role of iGluR in well-  
34 characterized principle neurons (e.g. CA1 pyramidal neurons) (Huganir and Nicoll, 2013), the  
35 picture in GABAergic neurons is far less clear, largely due to the diversity of cell types with  
36 distinct properties of glutamate transmission and heterogeneous patterns of iGluR expression  
37 (Akgul and McBain, 2016; Moreau and Kullmann, 2013). Here we provide quantitative mRNA  
38 profiles of iGluRs and auxiliary subunits in GTPs (Figure 4B-E), which suggests the potential for  
39 cell type specific assembly of a large variety of native AMPARs with customized distribution  
40 patterns and functional properties.

41

1 Glutamatergic synapses in GABAergic interneurons often contain higher proportions of CP-  
2 AMPARs (Jonas et al., 1994; McBain and Dingledine, 1993) and GluN2B-NMDARs (Lei and  
3 McBain, 2002), although the ratio between the two types of AMPARs and NMDARs vary  
4 significantly among different cell populations (Akgul and McBain, 2016). Consistent with and  
5 substantiating previous physiological results largely from hippocampal interneurons (Akgul and  
6 McBain, 2016), we found that the mRNA levels and relative ratio of CP- vs CI-AMPA  
7 subunits in PCPs vary in a highly cell type-dependent pattern (Figure 4B-D). CGE-derived VIP  
8 cells have overall relatively low AMPARs and roughly similar GluA1 and GluA2 levels  
9 ( $\text{GluA1}:\text{GluA2} = 1.4$ ), and VIP/CR cells have relatively more NMDARs especially those  
10 containing GluN2B ( $\text{GluN2B}:\text{GluN2A} = 11.0$ ). On the other hand, MGE-derived cells have  
11 much higher levels of GluA1 (average  $\text{GluA1}:\text{GluA2} = 8.4$ ), with striking cell type differences:  
12  $\text{GluA1}:\text{GluA2}$  ranges from 4.1 in SST/NOS1 cells to 20.4 in SST/CR cells (Figure 4D). While  
13 PV cells have highest GluA3 levels and CHCs have highest GluA4 levels, SST/CR cells show  
14 highest levels of GluA1 and highest non-GluA2/GluA2 ratio (24.8). Interestingly, SST/CR cells  
15 also have relatively high  $\text{GluN2A}:\text{GluN2B}$  ratio for NMDARs among the PCPs (Figure 4D).  
16 These results suggest cell type-dependent composition and correlation of AMPA and NMDA  
17 receptor pore-subunits, especially with regard to the relative abundance and ratio of CP- vs CI-  
18 AMPARs and 2B- vs 2A- NMDARs.

19  
20 In addition to the pore-forming subunits, native AMPARs incorporate multiple auxiliary subunits  
21 that regulate AMPAR membrane trafficking, synaptic targeting, gating and signaling (Haering et  
22 al., 2014; Jackson and Nicoll, 2011; Straub and Tomita, 2012). The large number and multiple  
23 families of AMPAR auxiliary proteins and their regional and cell type specific expression  
24 suggest that differential combinations of pore-forming and auxiliary subunits may assemble a  
25 large variety of native AMPARs with distinct synaptic distribution patterns and biophysical  
26 properties (Dawe et al., 2016; Khodosevich et al., 2014; Tao et al., 2013), but the expression  
27 patterns of these auxiliary subunits in GABAergic neurons are largely unknown. Our  
28 transcriptome analysis revealed that TARP, SHISA and CNIH family auxiliary subunits show  
29 striking cell specific expression patterns (Figure 4C-E).  $\text{TARP}\gamma 2$  is enriched in PV cells,  
30  $\text{TARP}\gamma 3$ ,  $\gamma 8$  and SHISA6 are enriched in SST/CR cells,  $\text{TARP}\gamma 3$  and SHISA9 are enriched in  
31 VIP/CCK cells. While PV cells predominantly express one auxiliary subunit ( $\text{TARP}\gamma 2$ ), SST/CR  
32 cells express at least 6 types ( $\text{TARP}\gamma 2$ ,  $\gamma 3$ ,  $\gamma 8$ ,  $\gamma 5$ ,  $\gamma 7$ , SHISA6). Whereas pore-subunits differ in  
33 expression levels, auxiliary subunits often show ON/OFF expression among GTPs (Figure 4E).  
34 These results suggest that different GABAergic neurons may assemble a specific set of native  
35 AMPARs with distinct pore and auxiliary subunit compositions, postsynaptic distribution  
36 patterns and biophysical properties. This large repertoire of native AMPARs may achieve cell  
37 type- and synapse- specific transmission and plasticity of glutamatergic inputs according to  
38 different presynaptic sources.

39 Taken together, these results suggest that, instead of receiving a more or less generic set of  
40 glutamatergic inputs, different GABAergic neurons likely deploy a distinct set of native  
41 AMPARs to customize the amplitude, duration, dynamics, and thus the shape of glutamate  
42 synaptic currents in a cell and synapse specific manner. (See summary in Table 1 for the striking  
43 case of SST/CR cells).

## 1 **Ionotropic GABA receptors (GABA<sub>A</sub>Rs)**

2 GABA<sub>A</sub> receptors mediate fast inhibitory neurotransmission and are assembled as  
3 heteropentameric chloride channels, typically consisting of 2 $\alpha$ , 2 $\beta$ , and 1 $\gamma$  subunits (Olsen and  
4 Sieghart, 2008). The subunit composition critically determines their kinetics, pharmacology, and  
5 subcellular distribution. Over a dozen of the total 19 subunits are expressed in the brain (e.g.  $\alpha$ 1-  
6 6,  $\beta$ 1-3,  $\gamma$ 1-3, and  $\delta$ ), suggesting the combinatorial potential for a very large number of GABA<sub>A</sub>R  
7 subtypes, but subunit partnership is thought to be governed by preferential assembly to form a  
8 more limited number of subtypes. Although multiple GABA<sub>A</sub>R types have been demonstrated in  
9 *in vitro* expression systems, to date only a dozen native GABA<sub>A</sub>Rs with known subunit  
10 composition have been identified based on co-expression, electrophysiological and  
11 pharmacological evidence (Olsen and Sieghart, 2009). The vast majority of possible subunit  
12 combinations remain tentative, in part because most studies only achieved brain regional but not  
13 cellular resolution of subunit expression and co-expression. Here we provide comprehensive and  
14 quantitative mRNA profiles of all GABA<sub>A</sub>R subunits in GTPs, which reveal highly cell type  
15 specific repertoire of GABA<sub>A</sub>R subtypes.  
16

17 Whereas  $\gamma$ 2 is ubiquitously present in all neurons and regarded as the obligatory subunit of most  
18 if not all synaptic GABA<sub>A</sub>Rs that mediate phasic inhibition,  $\gamma$ 3 is sparsely expressed in cortical  
19 neurons of unknown identity (Olsen and Sieghart, 2008). Although  $\gamma$ 3 can assemble with  $\alpha$  and  $\beta$   
20 to form synaptic receptors with slowly decaying IPSCs (Kerti-Szigeti et al., 2014), its cellular  
21 expression and physiological significance is unclear. We found that, surprisingly,  $\gamma$ 3 is not only  
22 prevalent but also transcribed at much higher levels than  $\gamma$ 2 subunits in all 6 GTPs (Figure 4H).  
23 This suggests that  $\gamma$ 3 may uniquely contribute to the assembly of a class of slower decaying,  
24 longer duration synaptic GABA<sub>A</sub>Rs in GABAergic neurons.  
25

26 Furthermore, different GTPs show highly specific subunit profiles and levels (Figure 4H, I). PV  
27 cells express the largest variety (all except  $\alpha$ 2,  $\alpha$ 6,  $\gamma$ 1) and overall highest levels of subunits, and  
28 uniquely high level of the GABA<sub>A</sub>R clustering/scaffolding protein gephyrin. In contrast, SST/CR  
29 cells express the least variety (mainly  $\alpha$ 3,  $\beta$ 1/3,  $\gamma$ 2/3) and lowest overall levels. Interestingly,  
30 SST/nNOS cells are distinguished by predominant expression of slow kinetics  $\alpha$ 2-containing  
31 GABA<sub>A</sub>Rs and, surprisingly, the exceedingly rare  $\gamma$ 1 subunit which is thought to assemble extra-  
32 or non- synaptic GABA<sub>A</sub>Rs (Dixon et al., 2014). On the other hand, PV and ChCs express the  $\delta$   
33 subunit, known to assemble extra-synaptic GABA<sub>A</sub>Rs (especially with in combination with  $\alpha$ 4 –  
34 highly enriched in PV cells) that localize to presynaptic terminals (Belelli et al., 2009; Herd et  
35 al., 2013).

36 These comprehensive and quantitative cell resolution profiles, when considered together with the  
37 well-characterized connectivity patterns among GTPs, suggest that distinct GABA<sub>A</sub>R subtypes  
38 with specific subunit combinations are likely targeted to specific connections that match the  
39 presynaptic terminals to optimize inhibitory transmission properties (Figure 4G). For example,  
40 PV cells predominantly mediate self-inhibition (i.e. other PV cells) in addition to perisomatic  
41 inhibition of pyramidal neurons (Jiang et al., 2015; Pfeffer et al., 2013). They further receive  
42 inhibitory inputs from SST cells (mainly SST/CR positive Martinotti cells) and interneuron-

1 selective VIP cells (mostly VIP/CR positive). Importantly, PV-PV transmission is one of the  
2 fastest in the brain, mediated by the  $\alpha 1\beta 2\gamma 2$  subtype (Hu et al., 2014; Klausberger et al., 2002).  
3 Based on these considerations, it can be inferred that  $\gamma 3$ -containing slow kinetics receptors, likely  
4 abundant in PV cells, are excluded from PV-PV synapses. Further, the unique co-expression  $\alpha 4$   
5 and  $\delta$ , a well-established combination for extrasynaptic and axonal GABA<sub>A</sub>R, suggest the  
6 presence of this subtype in PV cell terminals, likely activated by GABA spill-over (Herd et al.,  
7 2014) during concerted GABA release from dense perisomatic synapses characteristic to PV  
8 axon terminals. These considerations further raise the possibility that other subunit combinations,  
9 such as those containing  $\alpha 3$ ,  $\alpha 5$ , and  $\gamma 3$ , might support inputs from SST/CR and VIP/CR cells,  
10 especially in the dendritic compartment of PV cells (Ali and Thomson, 2008). Following similar  
11 logic, we infer that SST/CR cells receive VIP cell inputs (Jiang et al., 2015; Pfeiffer et al., 2013)  
12 likely through  $\alpha 3\beta 1/3\gamma 3$  type GABA<sub>A</sub>Rs, and VIP cells likely receive PV cell input (Jiang et al.,  
13 2015; Staiger et al., 1997) through  $\alpha 1$ -containing GABA<sub>A</sub>Rs and Martinotti cell input (Jiang et  
14 al., 2015; Staiger et al., 1997) through  $\alpha 3$ -containing GABA<sub>A</sub>Rs (See Supplementary text 2).

15  
16 Together, our results suggest that cell type specific subunit expression may allow assembly of  
17 specific repertoires of GABA<sub>A</sub>R subtypes, which are endowed with distinct biophysical and  
18 pharmacological properties, subcellular localization, and are targeted to specific postsynaptic  
19 sites that match presynaptic properties. This exquisite synapse specificity of receptor subtypes  
20 might customize inhibitory transmission properties between specific cell types (Figure 4G).

### 21 **Neuromodulatory and G-protein coupled receptors**

22 Cortical GABAergic neurons received a wide range of subcortical modulatory inputs that convey  
23 diverse signals of brain and behavioral states. These modulators, peptides and hormones act  
24 through a large family of G-protein coupled receptors (GPCRs) (Davenport et al., 2013), which  
25 trigger multiple signaling pathways that modulate ion channel properties and regulate electrical  
26 signaling and transmitter release (Luo, 2016). Decades of studies have revealed cell specific  
27 expression and function of neuromodulatory receptors in hippocampal interneurons (Armstrong  
28 and Soltesz, 2012), but a comprehensive picture of modulatory receptors across cell types have  
29 not been achieved. Here we present comprehensive and quantitative transcription profiles of  
30 neuromodulatory receptors in GTPs.

31  
32 Whereas MGE-derived interneurons (ChC, PV, SST/CR cells) are characterized by higher levels  
33 and larger variety of iGluRs and GABA<sub>A</sub>Rs, CGE-derived interneurons express much larger  
34 variety of neuromodulatory receptors (Figure 4K-L). This broad distinction is best illustrated by  
35 a comparison of PV and VIP/CCK cells (Figure 4J-L), both innervate the perisomatic regions of  
36 pyramidal neurons and are extensively studied in hippocampal CA1 (Armstrong and Soltesz,  
37 2012; Freund and Katona, 2007). We confirmed most findings derived from the hippocampus:  
38 whereas PV cells show enrichment of only a few modulatory receptors (e.g. CCK2R, Oprd1),  
39 VIP/CCK cells express multiple GPCRs for serotonin, acetylcholine, norepinephrin,  
40 endocannabinoid. We further discovered that VIP/CCK cells also express Adra1b, NPY and VIP  
41 receptors. Considered together with their iGluR and GABA<sub>A</sub>R profiles, these results suggest that,  
42 similar to their homologs in the hippocampus, cortical PV and CCK basket cells represent two

1 highly distinct cell types that likely provide different “flavors” of perisomatic inhibition (Freund  
2 and Katona, 2007): while the former is recruited by fast and precise excitatory and inhibitory  
3 inputs from local and cortical sources, the latter is profoundly modulated by subcortical inputs  
4 that represent mood, internal drive, and behavioral state.

5  
6 As a clear exception among MGE-derived GABA neurons, the unique long axon projection of  
7 SST/nNOS cells is associated with multiple unusual features, including neuromodulatory inputs.  
8 Contrasting other MGE cells, SST/nNOS cells express lower levels of iGluRs and extra- or non-  
9 synaptic  $\gamma 1$ -containing GABA<sub>A</sub>Rs. On the other hand, they express a large and unusual set of  
10 modulatory receptors including hypocretin, oxytocin, neurokinin, Tacr1 (Figure 4M), which are  
11 released from hypothalamic centers that regulate global brain states (Kilduff et al., 2011;  
12 Schwartz et al., 2016). Together, these results depict a cell type with weak phasic excitatory and  
13 inhibitory inputs but a wide range of tonic subcortical modulatory inputs, consistent with its  
14 activation by homeostatic sleep drive, and speculated role in regulating global cortical networks  
15 (Kilduff et al., 2011; Schwartz et al., 2016).

16  
17 GTPs are further characterized by their expression of orphan GPCRs for unknown or unproven  
18 ligands. Each GTP can be distinguished from all other by unique or highly enriched expression  
19 of at least 2 orphan GPCRs (Figure 4N). Although the function of most these GPCRs are  
20 unknown, the metabotropic Zn<sup>2+</sup> sensor GPR39/mZnR (Perez-Rosello et al., 2013) is specifically  
21 expressed in VIP/CCK and to a less extent SST/nNOS cells. Recent studies suggest that, upon  
22 Zn<sup>2+</sup> binding, which is co-released with glutamate and possibly other transmitters, GPR39  
23 promotes KCC2 membrane trafficking, thereby enhancing GABA<sub>A</sub>R mediated hyperpolarization  
24 (Chorin et al., 2011). Thus GPR39 in VIP/CCR cell might mediate activity-dependent  
25 modulation of their excitability.

26  
27 In summary, cell type profiles of modulatory receptors are highly congruent with their ionotropic  
28 receptor profiles and together may support the distinct recruitment and modulatory properties of  
29 each cell type. Cell specific repertoire of nearly all major families of ligand-gated receptors may  
30 endow GABAergic neuron the capacity to detect and transduce specific combinations of  
31 transmitters and modulators in a characteristic manner to elicit appropriate responses.

## 32 **Differential expression of voltage-gated ion channels and electrophysiological** 33 **properties of GTPs**

34 GABAergic neurons maintain their characteristic ionic balance to shape intrinsic membrane  
35 potential and firing properties. They respond to synaptic and modulatory inputs with changes in  
36 local membrane potentials that integrate and initiate action potentials, which propagate to axon  
37 terminals and trigger transmitter release and other physiological responses. These highly  
38 sophisticated electrophysiology properties and ion homeostasis are shaped by several families of  
39 voltage-gated ion channels (VGICs), each contains diverse family members with characteristic  
40 biophysical properties (Yu and Catterall, 2004). Among these, sodium channels (Nav) drive the  
41 initiation and propagation of membrane depolarization and action potential (Kruger and Isom,  
42 2016), potassium channels (Kv) regulate membrane re-polarization (Trimmer, 2015), and  
43 Calcium channels (Cav) transduce membrane potential changes into intracellular Ca<sup>2+</sup> transients

1 that initiate many physiological events (Zamponi et al., 2015). In addition to voltage dependence,  
2 intracellular signals (e.g.  $\text{Ca}^{2+}$ ,  $\text{H}^+$ , ATP, cyclic nucleotides) regulate calcium-activated (Kca),  
3 inward rectifier (Kir), and 2-pore (K2p) potassium channels (Trimmer, 2015). The ion  
4 selectivity, gating and regulation of these channels are tailored to shape specific aspects of  
5 electrical signaling. These channels are further targeted to subcellular compartments, often  
6 regulated by auxiliary subunits and linked to customized signaling complexes, to optimize  
7 electrical signaling at designated microdomains (Dolphin, 2016; Kruger and Isom, 2016; Vacher  
8 et al., 2008; Vacher and Trimmer, 2011). Except in rare cases (Hu et al., 2014), comprehensive  
9 profiles of VGICs in specific neuronal subpopulations have not been described. Our  
10 transcriptome analyses demonstrate extensive differential transcription profiles within and across  
11 multiple VGICs families among GTPs (Figure S4).

12  
13 Within the Nav and Cav family, major pore-forming subunits are broadly expressed among  
14 GTPs, often with different expression levels (Figure S4C-E). Interestingly, Cav auxiliary  
15 subunits ( $\beta 1-2$ ,  $\alpha 2$ ,  $\delta 1-4$ ) show more distinct, often binary (ON/OFF) pattern (Figure S4D),  
16 suggesting cell specific regulation of the trafficking, gating, and kinetics of pore forming  
17 subunits. Within the Kv family, different gene subsets are prominently enriched in each of the  
18 GTPs (Figure S4C). Importantly, there is a tight correlation between the expression of Kv  
19 principle subunits (e.g. Kcna1/Kv1.1 and Kcna2/Kv1.2) and their matching auxiliary subunits  
20 ( $\text{Kv}\beta 1-3$ , Kcnab1, b2 & b3) in specific GTPs (e.g. PV cells), suggesting cell specific assembly of  
21 functional channel complex.

22  
23 Although mRNA levels do not linearly translate into protein levels and their subcellular  
24 distribution patterns, the relevance of ion channel transcription profiles to physiological  
25 properties is highlighted by the striking case of PV cells. Fast-spiking PV cells convert an  
26 excitatory input signal to an inhibitory output signal within a millisecond, a stunning cell biology  
27 feat that appears to involve optimizing multiple aspects of electrical signaling across subcellular  
28 compartments, in part through specific expression and localization of a unique assortment of  
29 VGICs with highly tailored biophysical properties (Hu et al., 2014). For example, Kv1 and Kv3  
30 promote short action potential duration and sublinear summation, Nav1.1 (Scn1a) and Nav1.6  
31 (Scn8a) facilitate fast AP initiation and propagation, and Cav2.1 (P/Q) promotes fast GABA  
32 release (Hu et al., 2014). Our PV cell transcription profile confirms, and thus is validated by,  
33 these published molecular and electrophysiological studies. Our results further allow quantitative  
34 comparison of each channel gene expression across GTPs. For example, the prominent  
35 enrichment of multiple Navs (Scn9a, Scn8a, Scn1a, Scn3a, Scn1b, Scn4b, Scn2b) likely underlie  
36 the “supercritical density” of Nav for ensuring fast signaling in PV cell axons (Hu and Jonas,  
37 2014), and the striking elevation of a large set of fast-kinetics Kv1-4 members may implement  
38 rapid repolarization and narrow AP duration at each subcellular domain. In addition, our results  
39 reveal novel expression in auxiliary subunits Kca, Kir and K2p, which hint other uncharacterized  
40 physiological properties. These findings suggest that ion channel transcription profiles in other  
41 less characterized GTPs may similarly predict physiological features that can be validated by  
42 experimental studies. Together, our results suggest that differential and correlated expression  
43 across multiple families of VGIC subunits may customize the electrical signaling among GTPs.

## **Differential expression of signaling proteins in calcium, cyclic nucleotide and small GTPase 2<sup>nd</sup> messenger pathways customizes intracellular signaling in GTPs**

In addition to fast electrophysiological responses, extracellular signals trigger a variety of metabolic, morphologic, transcriptional and neurosecretory responses. The conversion of specific combination of inputs to a concerted set of short-term physiological and long-term adaptive responses is mediated by myriad intracellular signaling pathways. As a universally conserved cell signaling scheme (Alberts, 2014), a large repertoire of surface receptors transduce diverse extracellular signals into a small set of intracellular 2<sup>nd</sup> messengers such as Ca<sup>2+</sup>, cyclic nucleotides (e.g. cAMP, cGMP), lipid metabolites (e.g. diacylglycerol) and small GTPases (e.g. Ras, Rho); these 2<sup>nd</sup> messengers typically trigger enzyme cascades that engage different sets of effector proteins to execute cell responses in excitability, transmitter release, metabolic rate, neurite motility and gene expression (Figure 5A) (Luo, 2016). Studies from mostly non-neuronal systems have demonstrated that, superimposed upon several highly conserved schemes of 2<sup>nd</sup> messenger cascades, different cell types deploy a large set of regulatory signaling proteins to control the spatiotemporal dynamics of each 2<sup>nd</sup> messenger and signal transduction to specific effector systems to achieve appropriate cell responses (Brini et al., 2014; Halls and Cooper, 2011; McCormick and Baillie, 2014). The mammalian genome contains dozens of gene families that encode hundreds of signaling proteins associated with just a handful of major 2<sup>nd</sup> messenger systems (Alberts, 2014). Whether and how different neuron types coordinate the expression and action of multiple families of signaling proteins to customize signal transduction that translates specific input to appropriate output is almost entirely unknown. Through our computation screen of gene families, we discovered that, whereas most kinase cascades and signal proteins are broadly expressed, a small set of regulatory protein families in the calcium, cyclic nucleotide and small GTPase pathways are highly differential among GTPs and may tailor specific properties of their signal transduction (Figure 5).

### **Ca<sup>2+</sup> binding proteins likely shapes spatiotemporal dynamics of Ca<sup>2+</sup> signaling**

We found that each GTP expresses a set of ~5-8 different Ca<sup>2+</sup>-binding proteins (CaBPs; Figure 5D). Many of these CaBPs are in fact signaling proteins (e.g. Rasgrp1 in ChCs). These results suggest that differential expression of multiple Ca<sup>2+</sup> binding and signaling proteins might shape distinct spatiotemporal dynamics and the specificity of Ca<sup>2+</sup> signaling among GTPs (see Supplemental Text 3a).

### **Adenylyl cyclase and phosphodiesterase members may shape distinct cAMP signaling properties**

GPCRs signal through G proteins, many of which engage cAMP - the archetypical 2<sup>nd</sup> messenger pathway. cAMP activates protein kinase A (PKA) which regulates effector proteins through phosphorylation (Supplemental Text 3b). The synthesis, degradation and spatiotemporal dynamics of cAMP are stringently regulated at each step (Halls and Cooper, 2011). We found that, while the G protein subunits themselves are broadly expressed, regulators of G protein signaling (RGS; (Gerber et al., 2016) family members manifest highly differential expression, often with binary-ON/OFF patterns among GTPs (AUROC=0.93; Figure 5A-C); this suggests that the turning-off of G<sub>s</sub> subunit, a crucial step of G protein regulation, is implemented in a cell



1 specific manner. Downstream to G proteins, 7 of the 9 adenylyl cyclases (ACs) members with  
2 different catalytic and regulatory properties are differentially expressed (AUROC=0.85):  
3 whereas the  $\text{Ca}^{2+}$ /Calmodulin-activated AC1 and AC8 (Halls and Cooper, 2011) are enriched in  
4 PV and ChC cells, the PKC-activated AC7 and AC2 (Halls and Cooper, 2011) are enriched in  
5 SST/NOS1 and SST/CR cells, respectively (Figure 5A-C). More strikingly, phosphodiesterases  
6 (PDEs), which mediate rapid cAMP degradation (Maurice et al., 2014), is among the top  
7 differentially expressed gene families (AUROC=0.94): 15 of the 22 members are differentially  
8 expressed, often with ON/OFF patterns. For example, Pde11a, 1a, 4b, 7b are each highly  
9 enriched in ChC, SST, VIP/CR, and VIP/CCK populations (Figure 5A-C). Substantial evidence  
10 in non-neuronal cells have demonstrated that different PDE members are targeted to highly  
11 confined subcellular compartments, in part through recruitment by specific A kinase adaptor  
12 proteins (AKAPs) into signaling complexes (Edwards et al., 2012). It has been hypothesized that  
13 the assembly of these subcellular targeted “signalosomes” containing particular members of  
14 synthetic and degradation enzymes with distinct catalytic and regulatory properties, contributes  
15 to both the fine-tuning and specificity of compartmentalized cAMP signaling (Maurice et al.,  
16 2014). Although the specific combinations of AC, PDE and AKAP members and their functional  
17 effectors in GTPs remain to be elucidated, their specific and correlated transcription patterns  
18 suggest possible mechanisms whereby the spatiotemporal patterns of a single ubiquitous 2<sup>nd</sup>  
19 messenger can be crafted to direct receptor- (i.e. input) and cell-specific signal transduction in  
20 different GTPs.

### 21 **cGMP signaling modules in SST/nNOS and ChC**

22 In contrast to cAMP, which serves as a ubiquitous 2<sup>nd</sup> messenger for vast number of extracellular  
23 ligands through hundreds of GPCRs, cGMP signaling in the brain is predominantly triggered by  
24 nitric oxide (NO) (Lucas et al., 2000). In mature cortex, nNOS is expressed in subsets of  
25 GABAergic neurons, with high levels in a small set of SST<sup>+</sup> long projection cells (LPCs, also  
26 type I nNOS cells) and much lower levels in several other populations (type II nNOS cells)  
27 (Perrenoud et al., 2012; Taniguchi et al., 2011). Although the general scheme of NO signaling is  
28 well established in brain tissues (Supplemental Text 3c), whether NO and cGMP signaling is  
29 differentially implemented in different neuronal cell types is far from clear. We found that not  
30 only the synthetic enzyme nNOS is specific to LPCs, so is the expression of the major neuronal  
31 L-arginine transporter Slc7a3 that supplies the substrate for NO synthesis (Figure 5E; Friebe  
32 and Koesling, 2003). This tight co-expression likely contribute to a coordinated mechanism that  
33 endows LPCs as the major source of cortical NO and further suggests that type II nNOS neurons  
34 not only have low levels of the synthetic enzyme but also low levels of substrate for NO  
35 production. As the key link from NO to cGMP production, the soluble guanylyl cyclase (sGC)  
36 functions as a strict heterodimer of  $\alpha$  and  $\beta$  subunits, and the mouse brain mainly contains  
37 Gucy1 $\alpha$ 2, Gucy1 $\alpha$ 3, Gucy1 $\beta$ 3 (Friebe and Koesling, 2003). We found that while Gucy1 $\alpha$ 2 is  
38 expressed at low levels across GTPs, Gucy1 $\alpha$ 3 and Gucy1 $\beta$ 3 are highly enriched in ChC, PV  
39 and LPC cells but are nearly absent in SST/CR and VIP cells (Figure 5E). This result suggests  
40 that whereas cGMP signaling is likely prominent in the former three cell types, it is weak in the  
41 latter three populations. Consistent with this finding, cGMP-degrading Pde1a, 5a, 11a are also  
42 highly enriched in LPCs and ChCs (Figure 5E), which may regulate the spatiotemporal dynamics

1 of cGMP in these cells. Among the two types of cGMP-dependent PKGs, Prkg1 is found in all  
2 GTPs but with major enrichment in ChCs (Figure 5E). These results suggest that, unlike cAMP  
3 as a truly ubiquitous 2<sup>nd</sup> messenger, cGMP specializes to mediate NO signaling in specific cell  
4 types.

5  
6 Furthermore, we found at least two members of the transient receptor potential channels (Trpc5,  
7 Trpc6; (Takahashi et al., 2008; Yoshida et al., 2006) and BK-type potassium channels ( $\alpha$ 1 core  
8 subunit and  $\beta$  auxiliary subunits of KCNMA1; (Alioua et al., 1998; Kyle et al., 2013; Zhou et al.,  
9 2001)) that are differentially enriched in these two cell types (Figure 5F) and have been shown to  
10 be NO and PKG targets (See Supplemental Text 3c). Together, these results reveal striking  
11 differences in the mode of NO-cGMP signaling across GTPs and identified two distinct signaling  
12 modules in LPCs and ChCs. The stunning coordination in the expression of multiple (8-9) genes  
13 encoding almost the entire NO-cGMP pathway, from ligand synthesis and 2<sup>nd</sup> messenger  
14 signaling to potential effectors, can hardly be explained without invoking the transcriptional  
15 orchestration by an underlying cell type gene regulatory network.

### 16 **Differential expression of Ras and Rho small GTPases**

17 In addition to Ca<sup>2+</sup> and cyclic nucleotides, many cell surface receptors signal through a large set  
18 of Ras superfamily small GTPases to activate multiple kinase cascades that engage effectors  
19 (Alberts, 2014; Colicelli, 2004). Prominent among these effectors are transcription factors, which  
20 regulate gene expression (Ye and Carew, 2010), and cytoskeleton proteins that regulate cell  
21 shape, motility, adhesion and intracellular transport (Soderling, 2014). The mammalian genome  
22 contains ~30 Ras-GTPases and ~ 20 Rho-GTPases, and each is regulated by several dozens of  
23 guanine nucleotide exchange factors (GEFs) and inactivated by GTPase activating proteins  
24 (GAPs) (Cherfils and Zeghouf, 2013). Whether Ras and Rho signaling in the brain are tailored to  
25 the needs and properties of different neuron types are unknown, in part due to a near absence of  
26 knowledge on their cellular expression patterns.

27 We found that, within the Ras family, 21 of the 32 members showed major enrichment in  
28 specific GTPs (AUROC=0.84; also see Supplemental Text 3d). As different Ras family members  
29 might be activated by different upstream signals, have different cellular functions, and engage  
30 different downstream effectors (Buday and Downward, 2008; Mitin et al., 2005), this result  
31 suggests that GTPs might use Ras members to relay distinct external inputs and trigger  
32 appropriate transcription programs and other effectors that mediate long term cellular changes.  
33 Furthermore, both the Rho-GTPases and Rho-GEFs are differentially expressed. 37 of the 57  
34 Rho-GEFs (AURPC=0.82) and 14 of the 19 Rho-GTPases (AUROC=0.72; also see  
35 Supplemental Text 3d) are enriched in specific GTPs (Figure 5D). As different Rho members are  
36 often activated by designated GEFs (Cook et al., 2014), our results suggest that differential  
37 expression of Rho signaling and regulatory components might provide the mechanism and  
38 capacity to maintain the diversity of GABAergic neuron morphology, connectivity, and to  
39 support different forms of neurite and synaptic motility and plasticity.

40  
41 Altogether, our results suggest that, among the vast number of intracellular signaling proteins  
42 constituting myriad pathways that transduce major categories of extracellular inputs, a relatively  
43 small number encoded by just a few gene families are differentially expressed among GTPs and

1 likely customize signal transduction to the need and properties of cell types. These gene families  
2 converge onto a handful of 2<sup>nd</sup> messenger pathways mediated by calcium, cyclic nucleotides and  
3 small GTPases. A major theme is that almost all these gene families act close to the plasma  
4 membrane, before the kinase cascades. Superimposed upon the core skeletons of signaling  
5 pathways common across GTPs, these key regulatory components likely shape the specificity  
6 and spatiotemporal dynamics of broadly defined 2<sup>nd</sup> messengers that translate specific inputs to  
7 appropriate effectors and cellular responses. It is likely that cross talks among these 2<sup>nd</sup>  
8 messenger systems and signaling pathways may further enhance the specificity and flexibility of  
9 cell type specific signal transduction.

## 10 **Differential expression of neuropeptides and vesicle release machinery shape** 11 **distinct outputs**

12 The single most important physiological action of a nerve cell is influencing the activity of its  
13 target cells through the release of neurochemical substances. Indeed, the connectivity to proper  
14 synaptic partners, the reception and integration of diverse inputs, and the elaborate electrical and  
15 intracellular signaling all serve the final singular purpose of releasing appropriate  
16 neurochemicals in appropriate “styles”. Although the general scheme and principle of  
17 neurotransmitter release have been elucidated (Sudhof, 2013), the molecular mechanisms  
18 underlying the surprisingly diverse styles of vesicular release, which differentially impact  
19 postsynaptic responses and circuit operation (Markram et al., 2015), are not well understood.  
20 Through MetaNeighbour screen, we discovered a surprising diversity of neurochemical contents  
21 among GTPs and correlated differential expression of components of vesicular release  
22 machinery that may contribute to different release styles (Figure 6).

## 23 **A neuropeptide code of GABAergic neurons**

24 The synthesis and release of different transmitters, peptides and hormones represent a  
25 fundamental distinction among neuron types as they produce categorically different outputs that  
26 activate different receptors and elicit distinct physiological actions in target cells. However, it is  
27 unknown how many peptides are expressed by a GABAergic cell or cell type, and whether  
28 peptide expression serendipitously coincide with broad populations or tightly correlates with cell  
29 types defined by multiple other features. Our transcriptome analysis revealed a neuropeptide  
30 code of GABAergic neurons. We found that over 40 neuropeptides, hormones and secreted  
31 ligands are expressed in over 50% of single cells of the 6 GTPs, and each GTP expresses ~3-10  
32 different endogenous ligands (Figure 6B). Single cell analyses demonstrate that individual  
33 neurons express multiple peptide and protein ligands (Figure 6C). Importantly, differential  
34 expression of these ligands is the most discriminating gene family for GTPs (AUROC=0.96).  
35 Indeed, multiple GTPs are uniquely marked by individual ligands (Figure 6B-C; e.g. ChC:  
36 PTHLH, PV: Tac1, Adm, nNOS/SST: Ptn, Rln1, CR/SST: Nppc, VIP/CCR: Edn3, Pnoc). These  
37 results indicate that, beyond their morphological and physiological differences, GTPs are  
38 different neuroendocrine cells that produce distinct chemical outputs and elicit distinct  
39 physiological effects. Consistent with the demand for processing and packaging diverse  
40 neuropeptides, the granin gene family, which regulates pre-prohormone cleavage and biogenesis  
41 of DCVs (Bartolomucci et al., 2011), also shows differential expression among GTPs  
42 (AUROC=0.81 Table S4).

## 1 **Ptn in long projection GABA neurons may recruit oligodendrocytes for axon** 2 **myelination**

3 Although the function of most neuropeptides in GTPs are unknown, current knowledge on  
4 Pleiotropin (PTN) (Papadimitriou et al., 2016) enabled us to predict and then validate an  
5 unexpected cell phenotype in SST/nNOS long projection cells. PTN promotes axon myelination  
6 by activating the differentiation of oligodendrocyte precursors (Kuboyama et al., 2015). The  
7 unique expression of PTN in SST;NOS1 cells suggests that their axons might be myelinated. It is  
8 possible that PTN may promote LPC axon myelination during postnatal development and  
9 contribute to myelin maintenance in mature LPCs

10  
11 To test this prediction, we examined the expression of CASPR (Gordon et al., 2014), a key  
12 component of the node of Ranvier, along LPC axons. Indeed, CASPR consistently co-aligned in  
13 a paranodal pattern along LPC axons (Figure 6E; Figure S6), demonstrating that these axons are  
14 indeed myelinated. This finding is surprising as cortical GABAergic interneurons are thought to  
15 elaborate unmyelinated axons that enable extensive branching and innervation of local target  
16 cells. But the unique feature and property of LPCs suggest that myelination of their long  
17 projecting axons, many extend through the white matter, may enhance their conduction speed to  
18 regulate global cortical networks (Kilduff et al., 2011; Tamamaki and Tomioka, 2010).

## 19 **Vesicular zinc transporter in SST/CR cells suggests a GABAergic synaptic source of** 20 **zinc signaling**

21 In addition to amino acid-based transmitters and modulators, the divalent cation zinc acts as a  
22 bona fide neuromodulator that exerts potent and pleiotropic impacts on neuronal signaling  
23 (Marger et al., 2014). Zinc is enriched in mammalian cerebral hemisphere, where the vesicular  
24 transporter ZnT3 in a subset of glutamatergic neurons loads synaptic vesicles for co-release with  
25 glutamate. Synaptic release of zinc modulates multiple ion channels, especially certain types of  
26 extra-synaptic NMDA receptors (Marger et al., 2014). In particular, activity-dependent increase  
27 of Zinc at synapses inhibits GluN2A-containing NMDARs at nano-molar potency, which  
28 impacts glutamatergic transmission, plasticity and circuit operation (Vergnano et al.,  
29 2014)(Romero-Hernandez, Furukawa 2016). It is unknown whether non-glutamatergic neurons  
30 mediate synaptic zinc signaling.

31  
32 Surprisingly, we discovered that ZnT3 is highly and specifically expressed in SST/CR cells  
33 (Figure 6F). In addition, Zip1 and Zip7a transporters that mediate zinc uptake to the cytosol are  
34 also expressed in these cells. Therefore, SST/CR cells are equipped to accumulate cytosolic zinc  
35 for synaptic vesicle loading. These results suggest that SST/CR cells may co-release zinc and  
36 GABA. Most SST/CR cells are Martinotti cells (He et al., 2016) that target the distal dendrites  
37 and spines of pyramidal neurons with abundant GluN2A-NMDARs (Silberberg and Markram,  
38 2007). Our results suggest that Martinotti cells might exert their powerful dendritic inhibition  
39 through two parallel mechanisms: synaptic activation of GABA<sub>A</sub>Rs with GABA and extra-  
40 synaptic inhibition of NMDARs with zinc. As Martinotti cells broadly innervate other types of  
41 GABAergic neurons (Jiang et al., 2015), similar mechanisms might mediate their non-selective  
42 and potent inhibition of GABAergic populations.

## 1 **Synaptotagmin members correlate with vesicle neurochemical contents**

2 The current framework of the molecular machinery of vesicular release consists of SNARE  
3 complexes that form the core fusion pore, the  $\text{Ca}^{2+}$  sensing and regulatory components, the active  
4 zone that organizes the release site, and recycling of synaptic vesicle pools (Sudhof, 2013). The  
5 molecular components of vesicle fusion machinery are encoded by several multi-gene families,  
6 but it is not well understood how different members of these gene families shapes the release  
7 properties for transmitters and neuropeptides (Martin, 2003; Moghadam and Jackson, 2013;  
8 Sudhof, 2002).

9  
10 Our transcriptome analyses reveal a comprehensive picture of the molecular profiles of vesicle  
11 release machinery in GTPs (Figure 6G-I). Several core components of the fusion complex and  
12 active zone are broadly expressed, including Syntaxins (AUROC=0.5), SNAP complex  
13 (AUROC=0.614), RIMs and RIM binding proteins (AUROC=0.57) (Table S5). Yet even among  
14 these core components, VAMP (synaptobrevins) and SNAP members are significantly enriched  
15 in specific GTPs (Figure 6G-H). More prominent patterns relates to the vesicular  $\text{Ca}^{2+}$  sensor  
16 synaptotagmins (Syt): 14 of the 17 Syts are differentially expressed among GTPs (Figure 6G-I;  
17 AUROC=0.78); individual neurons expresses 6-9 Syts (>30 uTPM; data not shown). In  
18 particular, VIP/CCK cells specifically express Syt10 that mediates the release of Igf1 (Cao et al.,  
19 2011), which is also highly enriched in the same cells (Figure 6D, G). These results suggest that  
20 in individual cell types and individual neurons, different Syts may act as  $\text{Ca}^{2+}$  sensors with  
21 different sensitivity to spatiotemporal  $\text{Ca}^{2+}$  signals that trigger particular types of fusion  
22 reactions, thereby contributing to the specificity and properties in parallel exocytosis pathways.

## 23 **Molecular signatures of vesicular release styles**

24 In addition to chemical contents, the styles of transmitter release exert profoundly impacts on  
25 postsynaptic cells. The release sites of GABA and neuropeptides range from synaptic, axonal to  
26 somato-dendritic; the temporal characteristics range from fast, precise and synchronous (Hu and  
27 Jonas, 2014) to slow, sustained and asynchronous (Jonas and Hefft, 2010); and the short term  
28 dynamics following action potential trains range from facilitating to depressing (Markram et al.,  
29 2015). These different release styles produce distinct spatiotemporal patterns of receptor  
30 activation and postsynaptic cell firing that impact circuit level computation (Markram et al.,  
31 2015), but the underlying molecular mechanisms are not well understood.

32  
33 Although it is often difficult to directly correlate molecular profiles of vesicle machinery to  
34 transmitter release properties, the extensive knowledge on GABA release styles of PV and CCK  
35 basket cells (Armstrong and Soltesz, 2012) provides a unique opportunity. Whereas PV cell-  
36 mediated GABA release is fast, precise and synchronous (Hu and Jonas, 2014), that of CCK cells  
37 is slow, sustained and asynchronous (Jonas and Hefft, 2010). A comparison of their transcription  
38 profiles begins to depict the molecular distinction of fast vs slow release machines, which  
39 manifests even at the level of core fusion complex. We found that VAMP1, SNAP25, Nsf and  
40 Rab3a are highly enriched in PV compared to VIP/CCK cells (Figure 6G-H); co-expression of  
41 all three components in CHC and PV cells supports their fast spiking and release properties  
42 (Parpura and Mohideen, 2008). Furthermore, among the 4  $\text{Ca}^{2+}$ -binding Syts localized to SVs  
43 (Syt1, 2, 9, 12), both PV and VIP/CCK cells (and other GTPs) express Syt1, but only PV cells

1 express Syt2, which exhibits the fastest onset and decline in release. In addition, PV cell express  
2 highest level of Cplx1 but lowest level of Cplx2, while VIP/CCK cell profile is the exact  
3 opposite (Figure 6I-J). This Cplx profile is highly congruent with the Syt profile, as Cplx1 is  
4 implicated in fast and synchronous release and in clamping spontaneous release (Yang et al.,  
5 2013). Together, these results suggest that fast-synchronous release machine is built with high  
6 levels of VAMP1, SNAP25, NSF, Syt2, Cplx1. In contrast, slow-asynchronous release machine  
7 is built with low levels of these components and high levels of Cplx2. Together with expression  
8 of matching properties of Ca<sup>2+</sup> channels and CaBPs, these results suggest that different cell types  
9 are endowed with distinct vesicular neurochemical profiles and their release styles, implemented  
10 by coordinated differential expression of gene families that encode components of the vesicle  
11 fusion machinery.

12  
13 In addition to PV and CCK basket cells, it is notable that nNOS/SST long projection neurons  
14 express over 11 peptides (Figure 6B-D) and Syt4, 5, 6 are highly or uniquely enriched in these  
15 cells (Figure 6G). It is possible that these uncharacterized Syts might mediate the synaptic  
16 release of peptide-containing DVCs or their endocrine/paracrine release along the axon-dendritic  
17 membrane.

## 18 **Transcription factor profiles register the developmental history and** 19 **contribute to the maintenance of GTP phenotypes**

20 A recurring theme in our transcriptome analysis is the highly correlated and congruent  
21 differential expression among GTPs of select gene ensembles from gene families within and  
22 across the five functional categories (Figure 2D-E), suggesting orchestration by gene regulatory  
23 networks. Approximately 10% of the protein coding genes in the mouse genome are devoted to  
24 ~1,500 transcription factors (TFs). The combinatorial actions of TFs through their myriad  
25 cognate cis-regulatory elements provide enormous capacity for controlling the spatial and  
26 temporal transcription pattern of thousands of genes involved in the specification as well as the  
27 maintenance of cell identity (Davidson, 2010; Deneris and Hobert, 2014; Hobert, 2011), but the  
28 mechanisms that implement such transcriptional control are far from understood. As a  
29 prerequisite, comprehensive TF expression profiles in neuron types have not been described.

30  
31 Here we report quantitative expression profiles of TFs in GTPs and explore their implications in  
32 the maintenance of cell phenotypes and (Figure 7). We found that each GTP on average  
33 expresses ~350-400 TFs and over 300 TFs are expressed in an individual cell (at >30uTPM in  
34 >75% of cells in each GTP; Figure 7C). Among ~34 TF classes, basic-helix-loop-helix (bHLH)  
35 proteins, nuclear hormone receptors, POU-homeoboxes, and kruppel-like transcription factors  
36 are most differentially expressed among GTPs (Table S5). A comparison between MGE vs CGE  
37 GABA neurons revealed that ~65 TFs are common between the two populations with ~90 TFs  
38 enriched in MGE and ~110 TFs enriched in CGE populations (at >30uTPM in >75% of cells in  
39 each GTP). Among the 4 MGE-derived and 2 CGE-derived GTPs, each expresses between 150-  
40 220 TFs (>30uTPM in >75% of GTP population, Figure S7) and multiple TFs individually  
41 marks each GTP (>2 folds enriched, at >30uTPM) (Figure 7H).

## 1 **GABAergic neurons retain a transcription resume that registers their developmental** 2 **history**

3 The molecular mechanisms that maintain GABAergic cell phenotypes and identities are poorly  
4 understood. Studies in invertebrates and other mammalian brain regions suggest that neuronal  
5 identity is maintained in postmitotic cells by sustained expression of the same set of transcription  
6 factors that initiate terminal differentiation during neural development (Dalla Torre di  
7 Sanguinetto et al., 2008; Deneris and Hobert, 2014). Our experimental design allowed us to  
8 examine this hypothesis by comparing TF profiles in GTPs with those in their embryonic  
9 precursors during development.

10  
11 The embryonic subpallium contains a developmental plan embedded in progenitors along  
12 ganglionic eminence whereby transcription cascades orchestrate the specification and  
13 differentiation of major clades (i.e. MGE, CGE) of cortical GABAergic neurons (Kepecs and  
14 Fishell, 2014; Nord et al., 2015) (Figure 7A-B). A unique feature of our experimental design is  
15 that the 6 GTPs are embedded in 3 non-overlapping populations (PV, SST, VIP) from 2 separate  
16 developmental origins (MGE vs CGE) (Figure 7B). This data structure provides a developmental  
17 context for establishing the link between TF profiles in mature neurons to those in their  
18 embryonic precursors with cell type and single cell resolution. We found that almost all the well-  
19 studied TFs in embryonic precursors maintain their expression within the same clade of mature  
20 GTPs (Figure 7D, E): whereas Lhx6 (Du et al., 2008; Zhao et al., 2008), Sox6 (Azim et al., 2009;  
21 Batista-Brito et al., 2009), Mafk (McKinsey et al., 2013), Satb1 (Close et al., 2012; Denaxa et al.,  
22 2012) are expressed in PV and SST populations (i.e. the MGE clade), Coup-TF2 (Lodato et al.,  
23 2011), Sp8 (Ma et al., 2012), Prox1 (Miyoshi et al., 2015), Npas1, Npas3; Stanco et al., 2014)  
24 are expressed in VIP populations (i.e. the CGE clade). Furthermore, we discovered multiple  
25 additional TFs with similar patterns: whereas Tox family members (Tox, Tox2, Tox3) (Artegiani  
26 et al., 2015; Sahu et al., 2016) are restricted to the MGE clade, Nfi family members (Nfia, Nfib,  
27 Nfix) (Mason et al., 2009; Piper et al., 2014), Sall1 and Trp53i11 are restricted to the CGE clade.  
28 Importantly, by “reverse tracking” of their developmental history through screening the Allen  
29 Developmental Mouse Brain Atlas, we found that each of these TFs is indeed expressed in the  
30 embryonic MGE or CGE, consistent with their clade relationship (Figure 7I).

31  
32 Furthermore, by hierarchical and pair-wise comparison, we defined multiple sets of TFs that  
33 distinguish PV vs SST population (Figure 7F), and ChC vs PV, SST/nNOS vs SST/CR, and  
34 VIP/CR vs VIP/CCK cells (Figure 7G). Again, we found evidence for developmental continuity  
35 of TF expression from embryonic precursors to mature neurons (also see Supplemental Text 4  
36 and Figure S7B), with PV cells as the most notable case. Multiple PV-enriched TFs initiate  
37 expression at different stages of development, from Lhx6 and its downstream cascade (Figure  
38 7A, D-E) to Ssbp2, Nfib and Etv1 (Figure 7E-G; (Batista-Brito et al., 2008). In addition, the  
39 Ppargc1 $\alpha$  (peroxisome proliferator-activated receptor  $\gamma$  coactivator 1 $\alpha$ ) expression initiates in the  
40 first few postnatal days and maintains expression in mature PV cells (Cowell et al., 2007; Lucas  
41 et al., 2010). Although the comprehensive developmental profile of TF expression in PV cells  
42 remains to be determined, current evidence indicates that PV cells maintain sequentially acquired

1 transcriptional programs, from early genetically determined TFs to late activity-regulated TFs  
2 (Figure 7A).

3  
4 Together, these results suggest that mature GTPs register the developmental history of their  
5 transcription program, i.e. a “transcription resume”, and the sustained expression of sequentially  
6 accumulated transcription programs might contribute to the maintenance of corresponding cell  
7 phenotypes and properties. Consistent with this notion, conditional deletions of several of these  
8 TFs in adult cortex result in the loss of markers and physiological properties characteristic to  
9 their identity (Batista-Brito et al., 2009; Close et al., 2012; Miyazaki et al., 2012; Touzot et al.,  
10 2016), suggesting that they are required in mature neurons to maintain specific aspects of cell  
11 phenotypes and identity.

### 12 **The PGC1a transcription program coordinates the release and metabolic properties** 13 **of PV cells**

14 Consistent with the fast input-output transformation of PV basket cells, our analysis revealed  
15 highly congruent expression of fast-acting molecular components at every step of electrical  
16 signaling (e.g. Figure 4C-I, Figure 6G-K). In addition, the operation of PV cells requires  
17 specialized energy metabolism and mitochondria features (Lucas et al., 2010). It is unknown  
18 whether the molecular components mediating these distinct yet functionally congruent properties  
19 are cobbled together in a piece meal fashion or are orchestrated by transcription programs.

20  
21 The transcription coactivator PGC1 $\alpha$  was discovered in peripheral tissues and cooperates with  
22 multiple transcription factors to regulate mitochondria biogenesis and energy metabolism in  
23 response to fasting and exercise (Lin et al., 2005). In the brain, it is restricted to subset of  
24 GABAergic neurons, especially PV cells in the neocortex (Cowell et al., 2007). During brain  
25 development, PGC1 $\alpha$  expression increases dramatically in the first and second postnatal week,  
26 corresponding precisely with the substantial morpho-physiological maturation of PV cells during  
27 this period, and remains in PV cells thereafter (Lucas et al., 2010). Microarray studies in cell  
28 cultures and gene deletion in mice revealed that PGC1 $\alpha$  likely directly regulates the expression  
29 of PV and genes involved in mitochondria function and transmitter release (Lucas et al., 2014).  
30 However, the transcription co-factors and comprehensive transcription target genes of PGC1a in  
31 PV cells in vivo are unknown. Our transcriptome analysis revealed that, in addition to PGC1a,  
32 several of its co-factors (e.g. Rora, Esrrg, Pparg; Figure 7J) are significantly enriched in PV cells,  
33 suggesting a specific enhancement of the PGC1a transcription program. Furthermore, we  
34 confirmed that all the potential targets from previous studies (Lucas et al., 2014) are substantially  
35 enriched in PV cells (PV, Syt2, Nefh, Cplx1, Atp50, Atp5a1). In addition, we found an extended  
36 set of PV enriched mRNAs associated with metabolic and mitochondria pathways (e.g. Fndc5,  
37 Cox6a2, Cox6c, 7b; Figure 7J). Although a proof of transcriptional targets would require  
38 evidence of their alteration in PGC1a deficient cells and, ultimately, of direct binding to cis-  
39 regulatory elements, our results suggest that PGC1 $\alpha$  may coordinate a transcription module or  
40 gene battery that shapes the release and metabolic properties in PV cells.



## 1 **Molecular portraits of GABAergic cell types**

2 We have discovered highly correlated and congruent gene expression across multiple gene  
3 families and functional categories in each GTP. While coordinated expression within a  
4 functional category (e.g. voltage-gated ion channels) may shape a specific cell property (e.g. fast  
5 spiking), those across functional categories may shape a set of congruent cell properties that  
6 together characterize cell identity (e.g. fast input-output transformation in PV cells). Here we  
7 highlight the coherent and synergistic nature of these expression profiles that may to GTP  
8 phenotypes (Table 1).

### 9 **PV basket cell (PVC):**

10 PVCs innervate the perisomatic region, mediate fast input-output transformation, and contribute  
11 to feedforward, feedback inhibition and fast network oscillations (Hu et al., 2014). Their weakly  
12 excitable dendrites feature fast glutamate receptors, high levels of Kv3 channels, and very low  
13 level Navs; together these channel composition and distribution patterns allow high activation  
14 threshold, fast activation and fast de-activation. On the other hand, their axons feature several Na  
15 channel members (e.g. Nav1.1, Nav1.6) at exceedingly high levels and multiple types of K  
16 channels (e.g. Kv1); these ensure fast action potential generation and reliable and fast  
17 propagation. Furthermore, their axon terminal features fast gating P/Q type Ca<sup>2+</sup> channels tightly  
18 coupled to release machinery, the fastest Ca<sup>2+</sup>-sensing synaptotagmin (Syt2), and high  
19 concentration of calcium binding proteins (e.g. PV); together these ensure minimum synaptic  
20 delay for fast GABA release.

21  
22 Our transcriptome analysis confirmed all previously reported PVC markers (Table 1 in (Hu et al.,  
23 2014) and further allow quantitative comparison with other cell types with different  
24 physiological properties (e.g. CCK basket cells) to infer the significance of differential gene  
25 expression (e.g. Figure 6K). More importantly, we discovered a much larger set of PVC-enriched  
26 mRNAs that may contribute to their known properties and predict novel properties. With regard  
27 to voltage-gated ion channels, we found enrichment of Nav1.7 and a large set of regulatory  
28 subunits of Nav (Scn1b, Scn4b), Kv (Kcnab1, Kcnab3) and Cav (Cacna2d2) that likely co-  
29 assemble with corresponding core subunits to shape native channel properties. Regarding input,  
30 GluR core and auxiliary subunit profile (e.g. Cacng2, Figure 4E) suggests specialized native  
31 receptors likely endowed with specific trafficking and biophysical properties. Furthermore,  
32 GABA<sub>A</sub>R profile predicts the highest level and variety of receptor subtypes among GTPs (Figure  
33 4H-I). Regarding output, the striking co-enrichment of Vamp1, Syt2, Syt7, Cplx1, Snap25, NSF  
34 depicts increasing details of a fast-synchronous release machine (Figure 6G-K), and expression  
35 of novel neuropeptides (e.g. Adm, Rspn) suggests release of additional ligands (Figure 6B-D).  
36 Furthermore, novel signaling proteins (e.g. RGS4, Adcy8, Rasl11b, Arhgef10l) predicts  
37 specialized intracellular signaling properties (Figure 5B-D). Although expression of cell  
38 adhesion molecules are difficult to interpret, the specific enrichment of Slit and Unc5 members  
39 (Figure S3A) suggest their roles in axon branching, cell recognition and wiring specificity.  
40 Finally, our analysis of PGC1 $\alpha$  transcription program revealed putative co-transcription  
41 regulators (Esrrg, Mef2c; Figure 7J) and more comprehensive transcription targets (e.g. Fndc5,  
42 Cox6a2, Cox6c) that likely support the metabolic demand and enhanced mitochondria function.

1 Together, these results begin to depict a substantially high resolution molecular portrait of PVCs  
2 that contribute to fast signaling at every step: from fast excitation, fast-narrow spiking, to reliable  
3 spike propagation, fast GABA release and metabolic support. Such congruent expression of a  
4 large set of gene ensembles across multiple functional categories cannot be explained without  
5 invoking a master transcription program.

### 6 **CCK basket cell (CCKC):**

7 CCKCs are enriched in the VIP/CCK subpopulation. Although these cells also innervate the  
8 perisomatic region of pyramidal neurons, they show different, often opposite, physiological  
9 properties compared to PVCs (Armstrong and Soltesz, 2012). CCKCs receive less glutamatergic  
10 inputs but rich neuromodulatory inputs that convey mood and brain states. Accordingly, here we  
11 show that CCKCs express much less GluRs but a large set of modulatory receptors. In addition  
12 to the reported endocannabinoid (CB1R), serotonin (Htr2c, Htr3a) and acetylcholine (Chrm3)  
13 receptors, they further express neuropeptide (Vipr1, Npy1r) and norepinephrine (Adra1b)  
14 receptors (Figure 4). Contrary to PVCs, CCKCs mediate slow, asynchronous and sustain GABA  
15 release; these properties likely derive from the profile of their release machinery, which features  
16 low level of Vamp1, Syt2, Syt7, Cplx1, Snap25, NSF but high levels of Cplx2 (Figure 6G-K).  
17 Furthermore, CCKCs express a large set of neuropeptides and hormones (>12) and at least one of  
18 these, Igf10, is likely mediated by a specialized synaptotagmin (Syt10) (Figure 6B, D, G).  
19 Together, these results depict a molecular profile highly distinct from PVCs: CCKCs likely  
20 integrate information from multiple modulatory systems over longer time windows, exert more  
21 sustained inhibition to the perisomatic region, and release multiple neuropeptides and hormones  
22 through specialized release machineries.

### 23 **Chandelier cell (ChC):**

24 Although considered similar to PVC in several aspects, such as fast spiking and controlling  
25 pyramidal neuron output at the perisomatic region, ChCs are unique in their exquisite specificity  
26 to pyramidal neuron and to AIS, suggesting highly specialized function. Superimposed upon the  
27 notable similarity in their transcriptome profiles, we found significant differences across multiple  
28 gene categories between ChCs and PVCs. ChCs have: 1) different set of adhesion molecules  
29 (e.g. Unc5b) and sulfotransferases (e.g. Hstst4) that might contribute to different connectivity  
30 and extracellular matrix; 2) lower levels of Nav1.6, Kv1 and Kv3.2, consistent with their “not-as-  
31 fast” spiking property; 3) very low levels of  $\alpha 1$ ,  $\alpha 4$ ,  $\alpha 5$  GABA<sub>A</sub>Rs, suggesting that they receive  
32 weaker inhibitory inputs, especially from PVCs which mainly use  $\alpha 1$ -containing GABA<sub>A</sub>Rs; 4)  
33 enhanced NO and cGMP signaling (Gucy1b3, Prkg1, Pde11a, Pde5a); 5) distinct neuropeptide  
34 profiles; 6) distinct release machineries characterized by contrasting pattern of Vamp1, Vamp2,  
35 Syt1, Syt2, Syt7, Cplx1 – suggesting that ChC terminals do not mediate fast GABA release.  
36 Together, these results suggest that ChCs are distinct from PVCs in anatomic and physiological  
37 properties and represent a unique microcircuit module that exerts specific control of pyramidal  
38 neuron firing (Lu et al 2016 in revision).

### 39 **Martinotti cell (MNC):**

40 MNCs are enriched in the SST/CR subpopulation. They innervate the distal dendrites of  
41 pyramidal neurons and many other GABAergic neurons (Jiang et al., 2015; Silberberg and

1 Markram, 2007). They exhibit high spontaneous activity in vivo during resting state (Gentet et  
2 al., 2012) and provide powerful inhibition to broad targets, with an exception of other MNCs  
3 (Jiang et al., 2015). With sparsely spiny dendrites, their hippocampal homologue (O-LM cells)  
4 manifests AMPAR-mediated plasticity somewhat similar to that of glutamatergic pyramidal  
5 neurons (Oren et al., 2009). Our transcriptome analysis begins to suggest some underlying  
6 molecular mechanisms. Prominent transcription features of MNCs include: 1) highest level and  
7 largest variety of AMPARs and auxiliary subunits, 2) highest level and variety of NMDARs, 3)  
8 least variety and lowest levels of GABA<sub>A</sub>Rs. Interestingly, Grin3a is in fact a glycine receptor  
9 (Cummings and Popescu, 2016; Perez-Otano et al., 2016) that mediates depolarization and may  
10 contribute to high excitability (e.g. “low-threshold spiking”; (Amitai et al., 2002) and  
11 spontaneous tonic firing (Gentet et al., 2012). High levels of Gria1a, Grin1, Grin2a and low  
12 levels of GABA<sub>A</sub>Rs may contribute to enhanced glutamatergic excitability and plasticity (Oren  
13 et al., 2009). The most surprising finding is the specific expression of vesicular zinc transporter  
14 (Figure 6F), suggesting co-release of GABA and zinc that mediate two parallel inhibitory  
15 pathways: synaptic activation of GABA<sub>A</sub>Rs with GABA and extra-synaptic inhibition of  
16 NMDARs with zinc. Together, our results suggest mechanisms for a cell type with high level  
17 tonic firing and excitability, enhanced glutamatergic plasticity for learning, low level inhibition  
18 in part mediated by disinhibition, and co-release of GABA and zinc that might represent a novel  
19 mechanism to coordinate GABAergic and glutamatergic synaptic transmission and plasticity.

#### 20 **Interneuron selective cells (ISC):**

21 The VIP/CR population contains ISCs that mainly innervate SST and PV interneurons but avoid  
22 pyramidal neurons. ISCs can be recruited by several modulatory transmitters that signal salient  
23 sensory or internal stimuli to mediate rapid disinhibition of subsets of pyramidal neurons (Pfeffer  
24 et al., 2013; Pi et al., 2013). The prominent expression of multiple neuromodulatory receptors  
25 (Htr2c, Htr3a, Chrm3, Chrm4, Adra1b) is consistent with previous findings and predict novel  
26 input sources. Their release machine profile is similar to CCKCs, suggesting asynchronous,  
27 sustained GABA release that may mediate longer lasting disinhibition.

#### 28 **Long projection cell (LPC):**

29 Among the 6 GTPs, type I NOS long projection neuron is the most unusual and least understood.  
30 These cells appear to increase activity following sleep deprivation-induced recovery sleep and  
31 have been suggested to regulate global cortical states (Kilduff et al., 2011), but their cellular  
32 properties and physiological function are largely unknown. Our transcriptome analyses reveal  
33 and predict numerous physiological and anatomical features that can be validated. In terms of  
34 input, these neurons show the lowest level of iGluR core subunits (Figure 4C-E), suggesting  
35 weak glutamatergic excitation. They express highly unusual form of  $\gamma 1$  containing, likely non-  
36 synaptic, GABA<sub>A</sub>Rs (Figure 4H-I), suggesting slow GABAergic inhibitory inputs. Thus LPCs  
37 appear less engaged by fast glutamate and GABA transmission systems. Instead, they express a  
38 large set of neuromodulatory GPCRs, including acetylcholine, 5-HT, oxytocin, hypocretin  
39 (sleep peptide), and the unusual extra-retinal photoreceptor opn3 (Figure 4K-M). These results  
40 indicate that LPCs are strongly influenced by brain state modulatory inputs. In terms of output,  
41 in addition to GABA and NO, they express the largest number (~14) neuropeptide mRNAs  
42 (Figure 6B-C). Accordingly, they express multiple Ca<sup>2+</sup>-insensitive synaptotagmins (syt4, 5, 6),

1 which may contribute to non-synaptic peptide release through dense core vesicles (Figure 6G). In  
2 terms of signaling, they feature the entire NO signaling pathway, from substrate accumulation  
3 and NO synthesis to 2<sup>nd</sup> messenger cascade and target effectors (Figure 5E-F). A major surprise  
4 was our discovery, based on prediction from the specific expression of Ptn, that LPC axons are  
5 myelinated (Figure 6E). In contrast to most GABAergic interneurons with local axon arbors that  
6 are mostly unmyelinated, the myelination of LPC axons may increase the conduction velocity to  
7 their distant terminals. Together, these depict a large neurosecretory cell type that can be  
8 recruited during various behavioral states to modulate a wide range of neuronal and non-  
9 neuronal targets in global cortical networks. The highly coherent co-expression of multiple sets  
10 of functionally congruent gene ensembles cannot be explained without invoking an underlying  
11 transcription program.

## 12 **DISCUSSION**

13 Understanding the nature of neuronal identity is prerequisite to deciphering brain cell diversity  
14 and has remained a fundamental unsolved issue in neuroscience since the discovery of the  
15 Neuron Doctrine. Despite substantial progress in characterizing cell phenotypes along multiple  
16 axis and in cell type classification in several invertebrate species (e.g. worms, flies) and brain  
17 regions (e.g. the retina), the molecular biological basis of neuronal identity has remained obscure  
18 and a mechanistic framework has been elusive. Here, through single cell transcriptome analysis  
19 of anatomically and physiologically characterized ground truth cortical GABAergic neurons, we  
20 have discovered the transcriptional architecture of cardinal neuron types. This genetic  
21 architecture mainly encodes synaptic connectivity and input-output properties and comprises  
22 primarily 6 functional categories of ~40 gene families that include cell adhesion molecules,  
23 transmitter-modulator receptors, ion channels, signaling proteins, neuropeptides and vesicular  
24 release components, and transcription factors. Combinatorial and congruent expression of select  
25 members across these families is likely orchestrated by cell specific transcription programs,  
26 which shape a multi-layered molecular scaffold along cell membrane and may customize the  
27 patterns and properties of synaptic communication. In essence, our results suggest that the core  
28 identities of neuron types are encoded in key transcription programs that organize and constrain  
29 their basic patterns of physiological connectivity. As connectivity is the primary purpose of  
30 morphology and physiological connectivity is the basis of circuit operation, this overarching and  
31 mechanistic definition integrates the molecular, anatomical, physiological and functional  
32 descriptions of neuron types. Characterization of key transcription profiles of increasing number  
33 of ground truth types will provide reference axes for large scale transcriptome-based discovery  
34 of neuron types.

### 35 **Cortical GABAergic neurons are well suited for transcriptomic analysis of cell 36 phenotypes**

37 Compared with anatomical and physiological descriptions of cell properties, scRNAseq provides  
38 high dimensional, quantitative and high-throughput measurements of mRNA profiles, but  
39 transcriptome dataset needs to be validated by, harmonize with and explain orthogonal cell  
40 phenotypes that more directly contribute to circuit function. In most brain regions, knowledge of

1 cell phenotypes are often grossly incomplete and sketchy, thus transcriptome data may rapidly  
2 accumulate without the complementary support of and validation by neurobiological  
3 information. In this context, cortical GABAergic neurons are particularly well suited for  
4 exploring the molecular genetic basis of cell type identity through transcriptomics. Over 3  
5 decades of anatomical, physiological, molecular and developmental studies have accumulated  
6 substantial ground truth information on a large set of GABAergic populations and in some cases  
7 bona fide cell types (Hu et al., 2014; Huang, 2014; Jiang et al., 2015; Kepecs and Fishell, 2014;  
8 Markram et al., 2015). Importantly, the massive use of subcellular patch-clamp techniques and  
9 multiple cell recording provide quantitative physiological measurements of intrinsic, synaptic  
10 and release properties that more directly relate to gene expression and molecular mechanisms  
11 (Hu et al., 2014; Jiang et al., 2015; Markram et al., 2015). This information is further enriched by  
12 leveraging on deeper understanding of homologous cell types in the hippocampus (Somogyi et  
13 al., 2014). Therefore, cortical GABAergic neurons present a rare opportunity to systematically  
14 validate and harmonize gene expression profiles with specific morphological, biophysical,  
15 connectivity phenotypes. These ground truth information are essential for recognizing technical  
16 noise, statistical pitfalls and guiding our computational analysis. Indeed, many of our results are  
17 readily validated by the literature, provide deeper explanation of known cell phenotypes, and  
18 predict novel properties that can be examined with cell targeting tools (He et al., 2016).

## 19 **Computation genomics screen of gene ensembles that contribute to cell** 20 **phenotypes**

21 Our study differs from and complements several recent single cell transcriptome analyses  
22 (Shekhar et al., 2016; Tasic et al., 2016; Zeisel et al., 2015). Whereas previous studies aimed to  
23 classify cell diversity using statistical clustering of transcriptomes from unbiased cell populations  
24 (Zeisel et al., 2015) or relatively broad populations (Tasic et al., 2016), our goal was to discover  
25 the molecular basis of cell identity by analyzing phenotype-characterized subpopulations and  
26 bona fide cell types. In terms of methods, we combined 2-round of linear amplification of  
27 mRNA with unique molecular identifiers, which achieved more comprehensive coverage (>8000  
28 genes) and more quantitative measurements with a higher dynamic range (Figure S1) that  
29 facilitate subsequent computational analysis. Previous analyses of differential gene expression  
30 often identify sets of molecular markers for “transcriptomic types”; although useful, these  
31 markers often appear piecemeal, serendipitous, and do not readily inform cell phenotypes. On  
32 the other hand, we focused on analyzing differential gene ensemble profiles (i.e. gene families)  
33 encoding proteins that constitute cellular modules (Hartwell et al., 1999) (i.e. macromolecular  
34 machines, signaling complexes and pathways), which more readily relate to, explain and predict  
35 cell phenotypes. Most importantly, using ground truth population as an *assay*, we designed a  
36 supervised machine learning-based computational genomics strategy to systematically *screen* all  
37 gene families and rank their abilities to discriminate GTPs. This method enabled us to discover a  
38 rather small set of functionally related gene families, which constitute a coherent transcriptional  
39 architecture that organizes the physiological connectivity patterns that characterize GTPs. The  
40 MetaNeighbor (Crow et al. 2017) method can be applied to other gene ensembles such as GO  
41 terms, custom-annotated gene groups for signaling complexes and pathways to extract  
42 knowledge and insight from transcriptomic dataset.

## 1 **Transcriptional architecture of physiological connectivity defines neuronal** 2 **cell types**

3 An enduring challenge in classifying neurons in mammalian brain is that most if not all methods  
4 only provide sparse, partial and often less than quantitative measurements of 1-2 aspects (e.g.  
5 morphology, electrophysiology) of the inherently multi-faceted neuronal phenotypes. Thus the  
6 discordance between “cell types” defined by sparse and incomplete datasets on different  
7 phenotypes (DeFelipe et al., 2013; Petilla Interneuron Nomenclature et al., 2008) should perhaps  
8 not be surprising. Combining deep and quantitative transcriptomic with a computational screen  
9 that links gene ensembles to phenotype-characterized ground truth cell populations, our  
10 conclusion that transcriptional architecture of physiological connectivity defines neuron types  
11 can serve as an integrated and overarching scheme for neuron classification for several reasons.  
12 First, although morphology is the most common and intuitive description of neurons, it is  
13 increasingly recognized that morphology reflects and serves the more fundamental purpose of  
14 connectivity (Seung and Sumbul, 2014). Indeed, morphological types can be reliably identified  
15 from dense connectomes, when available, by computational algorithms (Jonas and Kording,  
16 2015). Furthermore, the variability of morphology likely belies the co-variation of pre- and post-  
17 synaptic neurites that preserve the same connectivity pattern (Sumbul et al., 2014). Therefore  
18 connectivity is the primary purpose of anatomy that integrates cell position and neurite  
19 morphology. Beyond anatomical connectivity, the functional purpose of a neuron type is to  
20 transform the physiological contents embedded in its synaptic inputs (e.g. excitatory vs  
21 inhibitory vs modulatory nature, strength, dynamics, spatiotemporal patterns) into appropriate  
22 outputs (Kepecs and Fishell, 2014; Sharpee, 2014), often characterized by cell intrinsic style of  
23 neurochemical release (transmitter-modulator contents, speed, dynamics, plasticity). Although  
24 extremely valuable, most electrophysiological measurements are made at cell soma regions,  
25 often in artificial conditions, that provide a rather limited window into the elaborate subcellular  
26 biophysical, cell biological and metabolic processes. Our analysis provides a comprehensive  
27 transcription overview of the synaptic, intrinsic and release machineries and reveals strikingly  
28 coherent molecular properties congruent with well characterized intrinsic, synaptic and release  
29 properties of GTPs (e.g. PVCs). They further predict multiple novel physiological features that  
30 can be experimentally verified. Thus transcription signatures of synaptic input-output  
31 machineries may begin to harmonize with and integrate the hitherto often limited, disparate and  
32 technically challenging electrophysiological measurements.

33  
34 In considering circuit function, cell types defined by their synaptic connectivity and input-output  
35 styles represent distinct structural and physiological motifs, with characteristic and restricted set  
36 of dynamic properties that support and constrain their role in circuit operations (Huang, 2014;  
37 Kepecs and Fishell, 2014; Markram et al., 2015). Differential assembly and physiological  
38 recruitment of these motifs into larger networks engage their participation in systems level  
39 information processing that underlies various context-dependent behaviors. In this sense, the  
40 physiological connectivity definition of cell types may integrate multi-parametric morphological,  
41 physiological and functional descriptions.

1 With current technical limitations, neuron type definition by physiological connectivity will  
2 remain a working hypothesis to be tested by the accumulation of connectome dataset in  
3 vertebrate brains in addition to those in worms, flies and the retina (Chen et al., 2006;  
4 Helmstaedter et al., 2013; Takemura et al., 2013). Comprehensive measurements of input-output  
5 properties are even more challenging and likely require novel methods for large scale recording  
6 (Marder, 2012). On the other hand, the rapid progress of transcriptome analysis will likely  
7 reinforce our finding on the transcriptional architecture of cell types and provide deeper and  
8 increasingly mechanistic insights into cell identity from the perspective of developmental  
9 genetics. There has been much debate on the arbitrary vs biological nature of cell types and the  
10 operational vs mechanistic basis of cell classification especially for cortical interneurons  
11 (Battaglia et al., 2013; DeFelipe et al., 2013). Despite the inherent variability of cell phenotypes -  
12 some seemingly a continuum without apparent boundary (Battaglia et al., 2013) likely in part due  
13 to technical limitations for measuring core phenotypes (e.g. connectivity), it is notable that the  
14 primary features of bona fide cell types (e.g. chandelier cells) are nearly identical among  
15 individuals of the same species and are conserved across species (Woodruff and Yuste, 2008).  
16 This self-evident fact suggests that, despite the diversity and variability, cardinal neuron types  
17 are reliably generated through developmental genetic mechanisms that specify cell fate and  
18 constrain their differentiation potential toward their connectivity-based identity in neural circuits.  
19 Our discovery of the transcriptional architecture of GTPs is likely a manifestation of  
20 transcription programs shaped by developmental genetic mechanisms rooted in the genome.

### 21 **Transcription resume may reflect the developmental accumulation of gene** 22 **regulatory programs that maintain cell phenotypes**

23 The highly coherent co-expression of large sets of gene ensembles encoding functionally  
24 congruent protein complexes, signaling and metabolic pathways that synergistically shape  
25 characteristic properties of each GTP strongly suggest the orchestration by gene regulatory  
26 networks. Transcriptional control of “gene batteries” has been demonstrated in experimental  
27 systems where brute force genetic analysis can establish causal links between specific  
28 transcription factors and their target effectors (Hobert et al., 2010). Complementing and  
29 substantiating previous studies of the PGC1 $\alpha$  transcription program in PVCs (Lucas et al., 2014),  
30 our transcriptome analyses suggest potential transcription co-regulators and additional putative  
31 target effectors (Figure 7J). Together these evidence suggest that, similar to the PGC1 $\alpha$  program,  
32 many other transcription modules remain to be discovered that coordinate the expression of  
33 functional gene ensembles (e.g. NO and cGMP signaling pathway in SST/nNOS cells).  
34

35 Furthermore, we found that numerous developmental transcription programs initiated at  
36 successive stages of postmitotic differentiation are maintained in the same clade of mature  
37 neurons (Figure 7A-G). Interestingly, conditional knockout of several such TFs result in the loss  
38 or alteration of interneuron identity consistent with their developmental expression and clade  
39 relationship (Close et al., 2012; Touzot et al., 2016). During the specification of diverse spinal  
40 motor neurons, a hierarchy of transcription programs progressively restrict cell fate and establish  
41 their competence in responding to subsequently initiated differentiation programs, including  
42 activity-dependent processes (Dalla Torre di Sanguinetto et al., 2008). It is possible that a similar

1 developmental principle guide the postmitotic migration, differentiation and maturation of  
2 cortical GABAergic neurons. In addition, our results suggest that most developmental programs  
3 remain in mature neurons and constitute a transcriptional resume that may maintain cell  
4 phenotypes and identity.

5  
6 Although our data are mostly correlative and causal links require experimental manipulations,  
7 the cumulative overwhelming evidence precludes piece meal, coincidental mechanisms of co-  
8 expression and leaves little doubt for orchestration of transcriptional programs that maintain cell  
9 phenotypes and identity. One of the greatest challenges in modern biology is to discover the  
10 transcriptional and epigenomic mechanisms that control gene expression programs underlying  
11 cell identity. Our study identifies a large set of co-regulated functional gene ensemble in multiple  
12 GTPs and provides opportunities to explore the underlying transcription factors and enhancers.

13

### 14 **Parallel GABAergic and peptidergic identities and their functional** 15 **implications**

16 Grounded on the concept that GABA is the major inhibitory neurotransmitter in vertebrate  
17 brains, investigations of cortical inhibitory neurons have centered around GABA-associated  
18 properties and function. Although neuropeptides are among the first set of serendipitous markers  
19 found in GABAergic neurons (Somogyi et al., 1984), their significance and implication have  
20 remained obscure. Our transcriptome analysis reveals that all GTPs are peptidergic and each has  
21 a distinct profile consisting of some 6-14 endogenous ligands (Figure 6B-C); indeed this gene  
22 family ranks at the very top in discriminating GTPs. Consistent with the fact that neuropeptides  
23 and hormones are differentially processed by proteolytic machinery and released from dense core  
24 vesicles with specialized fusion machinery, granin (implicated in neuropeptide processing and  
25 packaging (Bartolomucci et al., 2011)) and synaptotagmin (including Ca-independent variants  
26 implicated in hormone release) (Moghadam and Jackson, 2013) members are also differentially  
27 expressed among GTPs. The obligatory and extensive GABA-peptide co-expression indicates  
28 that cortical GABAergic neurons are inherently neuroendocrine cells. Furthermore, neuropeptide  
29 profiles and their packaging and release styles – key determinants of neurochemical output  
30 qualities, appear to constitute a peptide code of GABAergic subtype identity (e.g. chandelier  
31 cells, long projecting cells). These findings suggest that cortical GABAergic neurons are hybrid  
32 endocrine neurons with parallel identities represented by separate intracellular biogenic and  
33 release machines, intercellular signaling mechanisms, and physiological functions.

34

35 The pan-GABA identity is conferred by GABA synthesis (Gad1, Gad2), synaptic vesicle loading  
36 (vGAT) and release/recycling machineries. Diverse GABAergic neuron types manifest  
37 characteristic synapse specificity, input reception properties, intrinsic physiology and GABA  
38 release styles, all serving to craft specialized roles in fast, precise and dynamic inhibitory control  
39 of postsynaptic neurons and network activities through GABA receptors (Somogyi et al., 2014).  
40 On the hand, neuroendocrine identity is characterized by peptide synthesis, proteolytic  
41 processing and packaging through endoplasmic reticulum into dense core vesicles, and all-or-  
42 none type release machines (Moghadam and Jackson, 2013). Specific sets of peptides in



1 GABAergic types are likely released from synaptic as well as non-synaptic sites following  
2 different firing patterns that trigger GABA transmission; they may act as separate streams of  
3 neuromodulators to transform neuronal intrinsic and synaptic properties through cognate GPCRs  
4 and reconfigure networks at a slower temporal window and broader spatial scale, as  
5 demonstrated in better understood systems (Marder, 2012).

6  
7 Fast GABA-mediated inhibitory transmission and modulatory neuroendocrine signaling also  
8 have different evolutionary histories. Diverse neuropeptides are the predominant means of  
9 neurotransmission and modulation in invertebrate neural circuits (Bargmann, 2012)(Marder,  
10 2012). Many of these peptide systems are conserved in vertebrate peripheral and central nervous  
11 systems including the mammalian forebrain. Indeed the genetic programs that configure  
12 neuropeptide biogenesis, release and signaling have evolved since early metazoans (Mirabeau  
13 and Joly, 2013). On the other hand, although GABA-mediated neurotransmission is found in  
14 worms, flies and other invertebrates, their genomes typically feature a gene pair encoding 2  
15 GABA receptors (Tsang et al., 2007) that mostly form homo or hetero-meric cation channels  
16 instead of pentameric anion channels (Beg and Jorgensen, 2003; Gisselmann et al., 2004). It is  
17 not until early vertebrates, when the emergence of 19 GABA<sub>A</sub> receptor genes likely enabled the  
18 combinatorial assembly of highly diverse pentameric GABA<sub>A</sub> receptors that mediate fast  
19 chloride-based inhibitory transmission (Tsang et al., 2007). Notably, it is also in early vertebrates  
20 that the duplication and evolution of Dlx genes (Neidert et al., 2001) may have allowed their  
21 recruitment into ventral telencephalon progenitors of the ganglionic eminence and begin to drive  
22 forebrain GABAergic identity; this may further provide the basis for MGE and CGE genetic  
23 programs to specify forebrain GABAergic cell types (Nord et al., 2015). These considerations  
24 suggest at least two scenarios that cortical GABAergic endocrine cell types might arise: by  
25 building pan-GABA and GABA subtype identities upon a more ancient neuroendocrine identity  
26 template, or by initiating a novel forebrain GABAergic developmental program that incorporates  
27 available neuroendocrine genetic programs. One possibility is that GABAergic neuroendocrine  
28 identities are orchestrated by hierarchical transcriptional programs that specify and integrate  
29 GABAergic vs peptidergic features. For example, downstream to an overarching Dlx-based  
30 GABA identity, the PGC1 $\alpha$  program in PVCs may coordinate fast GABA release and high  
31 metabolism while a separate yet coupled transcription program may regulate Tac1 and Adm  
32 biogenesis and release to endow a peptidergic profile in the same cell type. This hypothesis can  
33 be tested by identifying transcription factors that regulate and coordinate GABAergic and  
34 peptidergic features.

## 35 **Conclusions**

36 We have discovered that the transcriptional architecture underlying synaptic connectivity and  
37 communication defines cardinal neuron types. Although transcription is influenced by cellular  
38 milieu including neural activity, core features of transcriptomes are outputs of cellular  
39 epigenomes customized primarily through developmental programming of the genome. Our  
40 finding thus suggests that the basic identities of cardinal neuron types are deeply encrypted in the  
41 genome. Characterization of key transcription profiles of increasing number of ground truth

1 neuron types will provide valuable reference axes for large scale transcriptome-based discovery  
2 of cell types and facilitate identification of homologous cell types across species. As high  
3 resolution molecular portraits of neuron types predict connectivity and physiological properties  
4 with impact on circuit operations, transcriptome-derived insights on cell types will integrate  
5 molecular and systems level analysis of neural circuits. It is notable that ChCs and PVCs are  
6 implicated in the pathophysiology of schizophrenia (Gonzalez-Burgos et al., 2015), and many  
7 mental disorders likely result from altered neural connectivity linked to deficient cell type  
8 components. High resolution transcriptome analyses of neuron types help understand the  
9 molecular basis of cellular connectivity and physiology, facilitate linking altered gene expression  
10 to aberrant cellular and circuit properties that contribute to illness, and will provide new set of  
11 therapeutic targets to ameliorate or compensate cellular and circuit deficits in brain disorders.

## 12 **AUTHOR CONTRIBUTIONS**

13 Z.J.H. and A.P. conceived the study. Z.J.H. organized and supervised the study. A.P. performed  
14 scRNAseq experiments. A.P. and R.R. performed mRNA in situ and immunohistochemistry  
15 experiments. A.P., Z.J.H., J.G., M.C. analyzed the data. M.C. and J.G. developed  
16 MetaNeighbour and performed DE, AUROC analysis. Z.J.H. and A.P. wrote the manuscript with  
17 contributions from J.G. and M.C.

## 18 **ACKNOWLEDGMENT**

19 We acknowledge Dr. Michael Wigler for sharing Unique Molecular Identifier strategy and  
20 barcodes (varietal tags), Jude Kendall for programming support, Drs. David Spector and Nour  
21 El-Amine for help with super-resolution microscopy and Priscila Wu for technical assistance.  
22 We thank Drs. Liquan Luo, Chris McBain, Tony Zador and Linda Van Aelst for valuable  
23 comments and suggestions on the manuscript. This work was supported by NIH  
24 5R01MH094705-04, R01MH109665-01 and CSHL Robertson Neuroscience Fund to Z.J.H. A.P.  
25 was supported by a NARSAD Postdoctoral Fellowship. J.G. and M.C. were supported by a gift  
26 from T. and V. Stanley.

## REFERENCES

- Akgul, G., and McBain, C.J. (2016). Diverse roles for ionotropic glutamate receptors on inhibitory interneurons in developing and adult brain. *The Journal of physiology* *594*, 5471-5490.
- Alberts, B., Johnson, A., Lewis, J., Morgan, D., Raff, M., Roberts, K., Walter, P., (2014). Cell Signaling. *Molecular Biology of the Cell Chapter 15*.
- Ali, A.B., and Thomson, A.M. (2008). Synaptic alpha 5 subunit-containing GABAA receptors mediate IPSPs elicited by dendrite-preferring cells in rat neocortex. *Cerebral cortex* *18*, 1260-1271.
- Alioua, A., Tanaka, Y., Wallner, M., Hofmann, F., Ruth, P., Meera, P., and Toro, L. (1998). The large conductance, voltage-dependent, and calcium-sensitive K<sup>+</sup> channel, Hslo, is a target of cGMP-dependent protein kinase phosphorylation in vivo. *The Journal of biological chemistry* *273*, 32950-32956.
- Amitai, Y., Gibson, J.R., Beierlein, M., Patrick, S.L., Ho, A.M., Connors, B.W., and Golomb, D. (2002). The spatial dimensions of electrically coupled networks of interneurons in the neocortex. *The Journal of neuroscience : the official journal of the Society for Neuroscience* *22*, 4142-4152.
- Ango, F., Wu, C., Van der Want, J.J., Wu, P., Schachner, M., and Huang, Z.J. (2008). Bergmann glia and the recognition molecule CHL1 organize GABAergic axons and direct innervation of Purkinje cell dendrites. *PLoS biology* *6*, e103.
- Armananzas, R., and Ascoli, G.A. (2015). Towards the automatic classification of neurons. *Trends in neurosciences* *38*, 307-318.
- Armstrong, C., and Soltesz, I. (2012). Basket cell dichotomy in microcircuit function. *The Journal of physiology* *590*, 683-694.
- Artegiani, B., de Jesus Domingues, A.M., Bragado Alonso, S., Brandl, E., Massalini, S., Dahl, A., and Calegari, F. (2015). Tox: a multifunctional transcription factor and novel regulator of mammalian corticogenesis. *The EMBO journal* *34*, 896-910.
- Azim, E., Jabaudon, D., Fame, R.M., and Macklis, J.D. (2009). SOX6 controls dorsal progenitor identity and interneuron diversity during neocortical development. *Nature neuroscience* *12*, 1238-1247.
- Bargmann, C.I. (2012). Beyond the connectome: how neuromodulators shape neural circuits. *BioEssays : news and reviews in molecular, cellular and developmental biology* *34*, 458-465.
- Bartolomucci, A., Possenti, R., Mahata, S.K., Fischer-Colbrie, R., Loh, Y.P., and Salton, S.R. (2011). The extended granin family: structure, function, and biomedical implications. *Endocrine reviews* *32*, 755-797.
- Batista-Brito, R., Machold, R., Klein, C., and Fishell, G. (2008). Gene expression in cortical interneuron precursors is prescient of their mature function. *Cerebral cortex* *18*, 2306-2317.
- Batista-Brito, R., Rossignol, E., Hjerling-Leffler, J., Denaxa, M., Wegner, M., Lefebvre, V., Pachnis, V., and Fishell, G. (2009). The cell-intrinsic requirement of Sox6 for cortical interneuron development. *Neuron* *63*, 466-481.
- Battaglia, D., Karagiannis, A., Gallopin, T., Gutch, H.W., and Cauli, B. (2013). Beyond the frontiers of neuronal types. *Frontiers in neural circuits* *7*, 13.
- Beg, A.A., and Jorgensen, E.M. (2003). EXP-1 is an excitatory GABA-gated cation channel. *Nature neuroscience* *6*, 1145-1152.
- Belelli, D., Harrison, N.L., Maguire, J., Macdonald, R.L., Walker, M.C., and Cope, D.W. (2009). Extrasynaptic GABAA receptors: form, pharmacology, and function. *The Journal of neuroscience : the official journal of the Society for Neuroscience* *29*, 12757-12763.

- Bota, M., and Swanson, L.W. (2007). The neuron classification problem. *Brain research reviews* *56*, 79-88.
- Brini, M., Cali, T., Ottolini, D., and Carafoli, E. (2014). Neuronal calcium signaling: function and dysfunction. *Cellular and molecular life sciences : CMLS* *71*, 2787-2814.
- Buday, L., and Downward, J. (2008). Many faces of Ras activation. *Biochimica et biophysica acta* *1786*, 178-187.
- Cajal, S.R.y. (1892). El nuevo concepto de la histologia de los centros nerviosos. *Rev Cienc Med*, *18*, pp. 457-476.
- Cao, P., Maximov, A., and Sudhof, T.C. (2011). Activity-dependent IGF-1 exocytosis is controlled by the Ca(2+)-sensor synaptotagmin-10. *Cell* *145*, 300-311.
- Chen, B.L., Hall, D.H., and Chklovskii, D.B. (2006). Wiring optimization can relate neuronal structure and function. *Proceedings of the National Academy of Sciences of the United States of America* *103*, 4723-4728.
- Cherfils, J., and Zeghouf, M. (2013). Regulation of small GTPases by GEFs, GAPs, and GDIs. *Physiological reviews* *93*, 269-309.
- Chorin, E., Vinograd, O., Fleidervish, I., Gilad, D., Herrmann, S., Sekler, I., Aizenman, E., and Hershinkel, M. (2011). Upregulation of KCC2 activity by zinc-mediated neurotransmission via the mZnR/GPR39 receptor. *The Journal of neuroscience : the official journal of the Society for Neuroscience* *31*, 12916-12926.
- Close, J., Xu, H., De Marco Garcia, N., Batista-Brito, R., Rossignol, E., Rudy, B., and Fishell, G. (2012). *Satb1* is an activity-modulated transcription factor required for the terminal differentiation and connectivity of medial ganglionic eminence-derived cortical interneurons. *The Journal of neuroscience : the official journal of the Society for Neuroscience* *32*, 17690-17705.
- Colicelli, J. (2004). Human RAS superfamily proteins and related GTPases. *Science's STKE : signal transduction knowledge environment* *2004*, RE13.
- Cook, D.R., Rossman, K.L., and Der, C.J. (2014). Rho guanine nucleotide exchange factors: regulators of Rho GTPase activity in development and disease. *Oncogene* *33*, 4021-4035.
- Cowell, R.M., Blake, K.R., and Russell, J.W. (2007). Localization of the transcriptional coactivator PGC-1alpha to GABAergic neurons during maturation of the rat brain. *The Journal of comparative neurology* *502*, 1-18.
- Crow, M., Paul, A., Ballouz, S., Huang, Z.J., and Gillis, J. (2017). Addressing the looming identity crisis in single cell RNA-seq. *bioRxiv* 150524.
- Cummings, K.A., and Popescu, G.K. (2016). Protons Potentiate GluN1/GluN3A Currents by Attenuating Their Desensitisation. *Scientific reports* *6*, 23344.
- Dalla Torre di Sanguinetto, S.A., Dasen, J.S., and Arber, S. (2008). Transcriptional mechanisms controlling motor neuron diversity and connectivity. *Current opinion in neurobiology* *18*, 36-43.
- Davenport, A.P., Alexander, S.P., Sharman, J.L., Pawson, A.J., Benson, H.E., Monaghan, A.E., Liew, W.C., Mpamhanga, C.P., Bonner, T.I., Neubig, R.R., *et al.* (2013). International Union of Basic and Clinical Pharmacology. LXXXVIII. G protein-coupled receptor list: recommendations for new pairings with cognate ligands. *Pharmacological reviews* *65*, 967-986.
- Davidson, E.H. (2010). Emerging properties of animal gene regulatory networks. *Nature* *468*, 911-920.
- Dawe, G.B., Musgaard, M., Aourousseau, M.R., Nayeem, N., Green, T., Biggin, P.C., and Bowie, D. (2016). Distinct Structural Pathways Coordinate the Activation of AMPA Receptor-Auxiliary Subunit Complexes. *Neuron* *89*, 1264-1276.
- de Wit, J., and Ghosh, A. (2014). Control of neural circuit formation by leucine-rich repeat proteins. *Trends in neurosciences* *37*, 539-550.

- de Wit, J., and Ghosh, A. (2016). Specification of synaptic connectivity by cell surface interactions. *Nature reviews Neuroscience* *17*, 22-35.
- DeFelipe, J., Lopez-Cruz, P.L., Benavides-Piccione, R., Bielza, C., Larranaga, P., Anderson, S., Burkhalter, A., Cauli, B., Fairen, A., Feldmeyer, D., *et al.* (2013). New insights into the classification and nomenclature of cortical GABAergic interneurons. *Nature reviews Neuroscience* *14*, 202-216.
- Denaxa, M., Kalaitzidou, M., Garefalaki, A., Achimastou, A., Lasrado, R., Maes, T., and Pachnis, V. (2012). Maturation-promoting activity of SATB1 in MGE-derived cortical interneurons. *Cell reports* *2*, 1351-1362.
- Deneris, E.S., and Hobert, O. (2014). Maintenance of postmitotic neuronal cell identity. *Nature neuroscience* *17*, 899-907.
- Dixon, C., Sah, P., Lynch, J.W., and Keramidis, A. (2014). GABAA receptor alpha and gamma subunits shape synaptic currents via different mechanisms. *The Journal of biological chemistry* *289*, 5399-5411.
- Dolphin, A.C. (2016). Voltage-gated calcium channels and their auxiliary subunits: physiology and pathophysiology and pharmacology. *The Journal of physiology* *594*, 5369-5390.
- Du, T., Xu, Q., Ocbina, P.J., and Anderson, S.A. (2008). NKX2.1 specifies cortical interneuron fate by activating Lhx6. *Development* *135*, 1559-1567.
- Edwards, H.V., Christian, F., and Baillie, G.S. (2012). cAMP: novel concepts in compartmentalised signalling. *Seminars in cell & developmental biology* *23*, 181-190.
- Eberwine, J., Yeh, H., Miyashiro, K., Cao, Y., Nair, S., Finnell, R., Zettel, M., and Coleman, P. (1992). Analysis of gene expression in single live neurons. *Proc. Natl. Acad. Sci. U.S.A.* *89*, 3010-3014.
- Flint, A.C., Maisch, U.S., Weishaupt, J.H., Kriegstein, A.R., and Monyer, H. (1997). NR2A subunit expression shortens NMDA receptor synaptic currents in developing neocortex. *The Journal of neuroscience : the official journal of the Society for Neuroscience* *17*, 2469-2476.
- Freund, T.F., and Katona, I. (2007). Perisomatic inhibition. *Neuron* *56*, 33-42.
- Friebe, A., and Koesling, D. (2003). Regulation of nitric oxide-sensitive guanylyl cyclase. *Circulation research* *93*, 96-105.
- Gentet, L.J., Kremer, Y., Taniguchi, H., Huang, Z.J., Staiger, J.F., and Petersen, C.C. (2012). Unique functional properties of somatostatin-expressing GABAergic neurons in mouse barrel cortex. *Nature neuroscience* *15*, 607-612.
- Gerber, K.J., Squires, K.E., and Hepler, J.R. (2016). Roles for Regulator of G Protein Signaling Proteins in Synaptic Signaling and Plasticity. *Molecular pharmacology* *89*, 273-286.
- Gisselmann, G., Plonka, J., Pusch, H., and Hatt, H. (2004). *Drosophila melanogaster* GRD and LCCH3 subunits form heteromultimeric GABA-gated cation channels. *British journal of pharmacology* *142*, 409-413.
- Gonzalez-Burgos, G., Cho, R.Y., and Lewis, D.A. (2015). Alterations in cortical network oscillations and parvalbumin neurons in schizophrenia. *Biological psychiatry* *77*, 1031-1040.
- Gordon, A., Adamsky, K., Vainshtein, A., Frechter, S., Dupree, J.L., Rosenbluth, J., and Peles, E. (2014). Caspr and caspr2 are required for both radial and longitudinal organization of myelinated axons. *The Journal of neuroscience : the official journal of the Society for Neuroscience* *34*, 14820-14826.
- Haering, S.C., Tapken, D., Pahl, S., and Hollmann, M. (2014). Auxiliary subunits: shepherding AMPA receptors to the plasma membrane. *Membranes* *4*, 469-490.
- Halls, M.L., and Cooper, D.M. (2011). Regulation by Ca<sup>2+</sup>-signaling pathways of adenylyl cyclases. *Cold Spring Harbor perspectives in biology* *3*, a004143.
- Hartwell, L.H., Hopfield, J.J., Leibler, S., and Murray, A.W. (1999). From molecular to modular cell biology. *Nature* *402*, C47-52.

- He, M., Tucciarone, J., Lee, S., Nigro, M.J., Kim, Y., Levine, J.M., Kelly, S.M., Krugikov, I., Wu, P., Chen, Y., *et al.* (2016). Strategies and Tools for Combinatorial Targeting of GABAergic Neurons in Mouse Cerebral Cortex. *Neuron* *91*, 1228-1243.
- Helmstaedter, M., Briggman, K.L., Turaga, S.C., Jain, V., Seung, H.S., and Denk, W. (2013). Connectomic reconstruction of the inner plexiform layer in the mouse retina. *Nature* *500*, 168-174.
- Herd, M.B., Brown, A.R., Lambert, J.J., and Belelli, D. (2013). Extrasynaptic GABA(A) receptors couple presynaptic activity to postsynaptic inhibition in the somatosensory thalamus. *The Journal of neuroscience : the official journal of the Society for Neuroscience* *33*, 14850-14868.
- Herd, M.B., Lambert, J.J., and Belelli, D. (2014). The general anaesthetic etomidate inhibits the excitability of mouse thalamocortical relay neurons by modulating multiple modes of GABAA receptor-mediated inhibition. *The European journal of neuroscience* *40*, 2487-2501.
- Hobert, O. (2011). Regulation of terminal differentiation programs in the nervous system. *Annual review of cell and developmental biology* *27*, 681-696.
- Hobert, O., Carrera, I., and Stefanakis, N. (2010). The molecular and gene regulatory signature of a neuron. *Trends in neurosciences* *33*, 435-445.
- Hollmann, M., Hartley, M., and Heinemann, S. (1991). Ca<sup>2+</sup> permeability of KA-AMPA--gated glutamate receptor channels depends on subunit composition. *Science* *252*, 851-853.
- Hu, H., Gan, J., and Jonas, P. (2014). Interneurons. Fast-spiking, parvalbumin(+) GABAergic interneurons: from cellular design to microcircuit function. *Science* *345*, 1255-1263.
- Hu, H., and Jonas, P. (2014). A supercritical density of Na(+) channels ensures fast signaling in GABAergic interneuron axons. *Nature neuroscience* *17*, 686-693.
- Huang, Z.J. (2014). Toward a genetic dissection of cortical circuits in the mouse. *Neuron* *83*, 1284-1302.
- Huang, Z.J., Di Cristo, G., and Ango, F. (2007). Development of GABA innervation in the cerebral and cerebellar cortices. *Nature reviews Neuroscience* *8*, 673-686.
- Huang, Z.J., and Zeng, H. (2013). Genetic approaches to neural circuits in the mouse. *Annual review of neuroscience* *36*, 183-215.
- Huganir, R.L., and Nicoll, R.A. (2013). AMPARs and synaptic plasticity: the last 25 years. *Neuron* *80*, 704-717.
- Jackson, A.C., and Nicoll, R.A. (2011). The expanding social network of ionotropic glutamate receptors: TARPs and other transmembrane auxiliary subunits. *Neuron* *70*, 178-199.
- Jiang, X., Shen, S., Cadwell, C.R., Berens, P., Sinz, F., Ecker, A.S., Patel, S., and Tolias, A.S. (2015). Principles of connectivity among morphologically defined cell types in adult neocortex. *Science* *350*, aac9462.
- Jonas, E., and Kording, K. (2015). Automatic discovery of cell types and microcircuitry from neural connectomics. *eLife* *4*, e04250.
- Jonas, P., and Hefft, S. (2010). GABA release at terminals of CCK-interneurons: synchrony, asynchrony and modulation by cannabinoid receptors (commentary on Ali & Todorova). *The European journal of neuroscience* *31*, 1194-1195.
- Jonas, P., Racca, C., Sakmann, B., Seeburg, P.H., and Monyer, H. (1994). Differences in Ca<sup>2+</sup> permeability of AMPA-type glutamate receptor channels in neocortical neurons caused by differential GluR-B subunit expression. *Neuron* *12*, 1281-1289.
- Kepecs, A., and Fishell, G. (2014). Interneuron cell types are fit to function. *Nature* *505*, 318-326.
- Kerti-Szigeti, K., Nusser, Z., and Eyre, M.D. (2014). Synaptic GABAA receptor clustering without the gamma2 subunit. *The Journal of neuroscience : the official journal of the Society for Neuroscience* *34*, 10219-10233.

- Khodosevich, K., Jacobi, E., Farrow, P., Schulmann, A., Rusu, A., Zhang, L., Sprengel, R., Monyer, H., and von Engelhardt, J. (2014). Coexpressed auxiliary subunits exhibit distinct modulatory profiles on AMPA receptor function. *Neuron* *83*, 601-615.
- Kilduff, T.S., Cauli, B., and Gerashchenko, D. (2011). Activation of cortical interneurons during sleep: an anatomical link to homeostatic sleep regulation? *Trends in neurosciences* *34*, 10-19.
- Klausberger, T., Roberts, J.D., and Somogyi, P. (2002). Cell type- and input-specific differences in the number and subtypes of synaptic GABA(A) receptors in the hippocampus. *The Journal of neuroscience : the official journal of the Society for Neuroscience* *22*, 2513-2521.
- Kolodkin, A.L., and Tessier-Lavigne, M. (2011). Mechanisms and molecules of neuronal wiring: a primer. *Cold Spring Harbor perspectives in biology* *3*.
- Kruger, L.C., and Isom, L.L. (2016). Voltage-Gated Na<sup>+</sup> Channels: Not Just for Conduction. *Cold Spring Harbor perspectives in biology* *8*.
- Kuboyama, K., Fujikawa, A., Suzuki, R., and Noda, M. (2015). Inactivation of Protein Tyrosine Phosphatase Receptor Type Z by Pleiotrophin Promotes Remyelination through Activation of Differentiation of Oligodendrocyte Precursor Cells. *The Journal of neuroscience : the official journal of the Society for Neuroscience* *35*, 12162-12171.
- Kyle, B.D., Hurst, S., Swayze, R.D., Sheng, J., and Braun, A.P. (2013). Specific phosphorylation sites underlie the stimulation of a large conductance, Ca(2+)-activated K(+) channel by cGMP-dependent protein kinase. *FASEB journal : official publication of the Federation of American Societies for Experimental Biology* *27*, 2027-2038.
- Lei, S., and McBain, C.J. (2002). Distinct NMDA receptors provide differential modes of transmission at mossy fiber-interneuron synapses. *Neuron* *33*, 921-933.
- Lin, J., Handschin, C., and Spiegelman, B.M. (2005). Metabolic control through the PGC-1 family of transcription coactivators. *Cell metabolism* *1*, 361-370.
- Lodato, S., Tomassy, G.S., De Leonibus, E., Uzcategui, Y.G., Andolfi, G., Armentano, M., Touzot, A., Gaztelu, J.M., Arlotta, P., Menendez de la Prida, L., *et al.* (2011). Loss of COUP-TFI alters the balance between caudal ganglionic eminence- and medial ganglionic eminence-derived cortical interneurons and results in resistance to epilepsy. *The Journal of neuroscience : the official journal of the Society for Neuroscience* *31*, 4650-4662.
- Lucas, E.K., Dougherty, S.E., McMeekin, L.J., Reid, C.S., Dobrunz, L.E., West, A.B., Hablitz, J.J., and Cowell, R.M. (2014). PGC-1alpha provides a transcriptional framework for synchronous neurotransmitter release from parvalbumin-positive interneurons. *The Journal of neuroscience : the official journal of the Society for Neuroscience* *34*, 14375-14387.
- Lucas, E.K., Markwardt, S.J., Gupta, S., Meador-Woodruff, J.H., Lin, J.D., Overstreet-Wadiche, L., and Cowell, R.M. (2010). Parvalbumin deficiency and GABAergic dysfunction in mice lacking PGC-1alpha. *The Journal of neuroscience : the official journal of the Society for Neuroscience* *30*, 7227-7235.
- Lucas, K.A., Pitari, G.M., Kazerounian, S., Ruiz-Stewart, I., Park, J., Schulz, S., Chepenik, K.P., and Waldman, S.A. (2000). Guanylyl cyclases and signaling by cyclic GMP. *Pharmacological reviews* *52*, 375-414.
- Luo, L. (2016). Signaling across synapses. *Principles of neurobiology Chapter 2*.
- Luo, L., Callaway, E.M., and Svoboda, K. (2008). Genetic dissection of neural circuits. *Neuron* *57*, 634-660.
- Ma, T., Zhang, Q., Cai, Y., You, Y., Rubenstein, J.L., and Yang, Z. (2012). A subpopulation of dorsal lateral/caudal ganglionic eminence-derived neocortical interneurons expresses the transcription factor Sp8. *Cerebral cortex* *22*, 2120-2130.
- Macosko, E.Z., Basu, A., Satija, R., Nemes, J., Shekhar, K., Goldman, M., Tirosh, I., Bialas, A.R., Kamitaki, N., Martersteck, E.M., *et al.* (2015). Highly Parallel Genome-wide Expression Profiling of Individual Cells Using Nanoliter Droplets. *Cell* *161*, 1202-1214.
- Marder, E. (2012). Neuromodulation of neuronal circuits: back to the future. *Neuron* *76*, 1-11.

- Marger, L., Schubert, C.R., and Bertrand, D. (2014). Zinc: an underappreciated modulatory factor of brain function. *Biochemical pharmacology* *91*, 426-435.
- Markram, H., Muller, E., Ramaswamy, S., Reimann, M.W., Abdellah, M., Sanchez, C.A., Ailamaki, A., Alonso-Nanclares, L., Antille, N., Arsever, S., *et al.* (2015). Reconstruction and Simulation of Neocortical Microcircuitry. *Cell* *163*, 456-492.
- Martin, T.F. (2003). Tuning exocytosis for speed: fast and slow modes. *Biochimica et biophysica acta* *1641*, 157-165.
- Mason, S., Piper, M., Gronostajski, R.M., and Richards, L.J. (2009). Nuclear factor one transcription factors in CNS development. *Molecular neurobiology* *39*, 10-23.
- Matta, J.A., Pelkey, K.A., Craig, M.T., Chittajallu, R., Jeffries, B.W., and McBain, C.J. (2013). Developmental origin dictates interneuron AMPA and NMDA receptor subunit composition and plasticity. *Nature neuroscience* *16*, 1032-1041.
- Maurice, D.H., Ke, H., Ahmad, F., Wang, Y., Chung, J., and Manganiello, V.C. (2014). Advances in targeting cyclic nucleotide phosphodiesterases. *Nature reviews Drug discovery* *13*, 290-314.
- McBain, C.J., and Dingledine, R. (1993). Heterogeneity of synaptic glutamate receptors on CA3 stratum radiatum interneurons of rat hippocampus. *The Journal of physiology* *462*, 373-392.
- McCormick, K., and Baillie, G.S. (2014). Compartmentalisation of second messenger signalling pathways. *Current opinion in genetics & development* *27*, 20-25.
- McKinsey, G.L., Lindtner, S., Trzcinski, B., Visel, A., Pennacchio, L.A., Huylebroeck, D., Higashi, Y., and Rubenstein, J.L. (2013). Dlx1&2-dependent expression of Zfhx1b (Sip1, Zeb2) regulates the fate switch between cortical and striatal interneurons. *Neuron* *77*, 83-98.
- Mirabeau, O., and Joly, J.S. (2013). Molecular evolution of peptidergic signaling systems in bilaterians. *Proceedings of the National Academy of Sciences of the United States of America* *110*, E2028-2037.
- Mitin, N., Rossman, K.L., and Der, C.J. (2005). Signaling interplay in Ras superfamily function. *Current biology : CB* *15*, R563-574.
- Miyazaki, T., Takase, K., Nakajima, W., Tada, H., Ohya, D., Sano, A., Goto, T., Hirase, H., Malinow, R., and Takahashi, T. (2012). Disrupted cortical function underlies behavior dysfunction due to social isolation. *The Journal of clinical investigation* *122*, 2690-2701.
- Miyoshi, G., Young, A., Petros, T., Karayannis, T., McKenzie Chang, M., Lavado, A., Iwano, T., Nakajima, M., Taniguchi, H., Huang, Z.J., *et al.* (2015). Prox1 Regulates the Subtype-Specific Development of Caudal Ganglionic Eminence-Derived GABAergic Cortical Interneurons. *The Journal of neuroscience : the official journal of the Society for Neuroscience* *35*, 12869-12889.
- Moghadam, P.K., and Jackson, M.B. (2013). The functional significance of synaptotagmin diversity in neuroendocrine secretion. *Frontiers in endocrinology* *4*, 124.
- Moreau, A.W., and Kullmann, D.M. (2013). NMDA receptor-dependent function and plasticity in inhibitory circuits. *Neuropharmacology* *74*, 23-31.
- Neidert, A.H., Virupannavar, V., Hooker, G.W., and Langeland, J.A. (2001). Lamprey Dlx genes and early vertebrate evolution. *Proceedings of the National Academy of Sciences of the United States of America* *98*, 1665-1670.
- Nord, A.S., Pattabiraman, K., Visel, A., and Rubenstein, J.L. (2015). Genomic perspectives of transcriptional regulation in forebrain development. *Neuron* *85*, 27-47.
- Olsen, R.W., and Sieghart, W. (2008). International Union of Pharmacology. LXX. Subtypes of gamma-aminobutyric acid(A) receptors: classification on the basis of subunit composition, pharmacology, and function. Update. *Pharmacological reviews* *60*, 243-260.
- Olsen, R.W., and Sieghart, W. (2009). GABA A receptors: subtypes provide diversity of function and pharmacology. *Neuropharmacology* *56*, 141-148.



- Oren, I., Nissen, W., Kullmann, D.M., Somogyi, P., and Lamsa, K.P. (2009). Role of ionotropic glutamate receptors in long-term potentiation in rat hippocampal CA1 oriens-lacunosum moleculare interneurons. *The Journal of neuroscience : the official journal of the Society for Neuroscience* *29*, 939-950.
- Papadimitriou, E., Pantazaka, E., Castana, P., Tsalios, T., Polyzos, A., and Beis, D. (2016). Pleiotrophin and its receptor protein tyrosine phosphatase beta/zeta as regulators of angiogenesis and cancer. *Biochimica et biophysica acta* *1866*, 252-265.
- Parpura, V., and Mohideen, U. (2008). Molecular form follows function: (un)snaring the SNAREs. *Trends in neurosciences* *31*, 435-443.
- Paul, A., Cai, Y., Atwal, G.S., and Huang, Z.J. (2012). Developmental Coordination of Gene Expression between Synaptic Partners During GABAergic Circuit Assembly in Cerebellar Cortex. *Frontiers in neural circuits* *6*, 37.
- Perez-Otano, I., Larsen, R.S., and Wesseling, J.F. (2016). Emerging roles of GluN3-containing NMDA receptors in the CNS. *Nature reviews Neuroscience* *17*, 623-635.
- Perez-Rosello, T., Anderson, C.T., Schopfer, F.J., Zhao, Y., Gilad, D., Salvatore, S.R., Freeman, B.A., Hershfinkel, M., Aizenman, E., and Tzounopoulos, T. (2013). Synaptic Zn<sup>2+</sup> inhibits neurotransmitter release by promoting endocannabinoid synthesis. *The Journal of neuroscience : the official journal of the Society for Neuroscience* *33*, 9259-9272.
- Perrenoud, Q., Geoffroy, H., Gauthier, B., Rancillac, A., Alfonsi, F., Kessarar, N., Rossier, J., Vitalis, T., and Gallopin, T. (2012). Characterization of Type I and Type II nNOS-Expressing Interneurons in the Barrel Cortex of Mouse. *Frontiers in neural circuits* *6*, 36.
- Petilla Interneuron Nomenclature, G., Ascoli, G.A., Alonso-Nanclares, L., Anderson, S.A., Barrionuevo, G., Benavides-Piccione, R., Burkhalter, A., Buzsaki, G., Cauli, B., Defelipe, J., *et al.* (2008). Petilla terminology: nomenclature of features of GABAergic interneurons of the cerebral cortex. *Nature reviews Neuroscience* *9*, 557-568.
- Pfeffer, C.K., Xue, M., He, M., Huang, Z.J., and Scanziani, M. (2013). Inhibition of inhibition in visual cortex: the logic of connections between molecularly distinct interneurons. *Nature neuroscience* *16*, 1068-1076.
- Pi, H.J., Hangya, B., Kvitsiani, D., Sanders, J.I., Huang, Z.J., and Kepecs, A. (2013). Cortical interneurons that specialize in disinhibitory control. *Nature* *503*, 521-524.
- Piper, M., Barry, G., Harvey, T.J., McLeay, R., Smith, A.G., Harris, L., Mason, S., Stringer, B.W., Day, B.W., Wray, N.R., *et al.* (2014). NFIB-mediated repression of the epigenetic factor Ezh2 regulates cortical development. *The Journal of neuroscience : the official journal of the Society for Neuroscience* *34*, 2921-2930.
- Rudy, B., Fishell, G., Lee, S., and Hjerling-Lefler, J. (2011). Three groups of interneurons account for nearly 100% of neocortical GABAergic neurons. *Developmental neurobiology* *71*, 45-61.
- Sahu, S.K., Fritz, A., Tiwari, N., Kovacs, Z., Pouya, A., Wullner, V., Bora, P., Schacht, T., Baumgart, J., Peron, S., *et al.* (2016). TOX3 regulates neural progenitor identity. *Biochimica et biophysica acta* *1859*, 833-840.
- Schwartz, M.D., Nguyen, A.T., Warriar, D.R., Palmerston, J.B., Thomas, A.M., Morairty, S.R., Neylan, T.C., and Kilduff, T.S. (2016). Locus Coeruleus and Tuberomammillary Nuclei Ablations Attenuate Hypocretin/Orexin Antagonist-Mediated REM Sleep. *eNeuro* *3*.
- Seung, H.S., and Sumbul, U. (2014). Neuronal cell types and connectivity: lessons from the retina. *Neuron* *83*, 1262-1272.
- Sharpee, T.O. (2014). Toward functional classification of neuronal types. *Neuron* *83*, 1329-1334.
- Shekhar, K., Lapan, S.W., Whitney, I.E., Tran, N.M., Macosko, E.Z., Kowalczyk, M., Adiconis, X., Levin, J.Z., Nemesh, J., Goldman, M., *et al.* (2016). Comprehensive Classification of Retinal Bipolar Neurons by Single-Cell Transcriptomics. *Cell* *166*, 1308-1323 e1330.

- Silberberg, G., and Markram, H. (2007). Disynaptic inhibition between neocortical pyramidal cells mediated by Martinotti cells. *Neuron* *53*, 735-746.
- Soderling, S.H., Van Aelst, L. (2014). Principles driving the spatial organization of Rho GTPase signaling at synapses. A Wittinghofer (ed), *Ras Superfamily Small G Proteins: Biology and Mechanisms Springer-Verlag Wien 2014*.
- Somogyi, P. (1977). A specific 'axo-axonal' interneuron in the visual cortex of the rat. *Brain research* *136*, 345-350.
- Somogyi, P., Hodgson, A.J., Smith, A.D., Nunzi, M.G., Gorio, A., and Wu, J.Y. (1984). Different populations of GABAergic neurons in the visual cortex and hippocampus of cat contain somatostatin- or cholecystinin-immunoreactive material. *The Journal of neuroscience : the official journal of the Society for Neuroscience* *4*, 2590-2603.
- Somogyi, P., Katona, L., Klausberger, T., Lasztozci, B., and Viney, T.J. (2014). Temporal redistribution of inhibition over neuronal subcellular domains underlies state-dependent rhythmic change of excitability in the hippocampus. *Philosophical transactions of the Royal Society of London Series B, Biological sciences* *369*, 20120518.
- Sperry, R.W. (1945). The problem of central nervous reorganization after nerve regeneration and muscle transposition. *The Quarterly review of biology* *20*, 311-369.
- Staiger, J.F., Freund, T.F., and Zilles, K. (1997). Interneurons immunoreactive for vasoactive intestinal polypeptide (VIP) are extensively innervated by parvalbumin-containing boutons in rat primary somatosensory cortex. *The European journal of neuroscience* *9*, 2259-2268.
- Staiger, J.F., Masannek, C., Schleicher, A., and Zuschratter, W. (2004). Calbindin-containing interneurons are a target for VIP-immunoreactive synapses in rat primary somatosensory cortex. *The Journal of comparative neurology* *468*, 179-189.
- Stanco, A., Pla, R., Vogt, D., Chen, Y., Mandal, S., Walker, J., Hunt, R.F., Lindtner, S., Erdman, C.A., Pieper, A.A., *et al.* (2014). NPAS1 represses the generation of specific subtypes of cortical interneurons. *Neuron* *84*, 940-953.
- Straub, C., and Tomita, S. (2012). The regulation of glutamate receptor trafficking and function by TARPs and other transmembrane auxiliary subunits. *Current opinion in neurobiology* *22*, 488-495.
- Sudhof, T.C. (2002). Synaptotagmins: why so many? *The Journal of biological chemistry* *277*, 7629-7632.
- Sudhof, T.C. (2008). Neuroligins and neurexins link synaptic function to cognitive disease. *Nature* *455*, 903-911.
- Sudhof, T.C. (2013). Neurotransmitter release: the last millisecond in the life of a synaptic vesicle. *Neuron* *80*, 675-690.
- Sugino, K., Hempel, C.M., Miller, M.N., Hattox, A.M., Shapiro, P., Wu, C., Huang, Z.J., and Nelson, S.B. (2006). Molecular taxonomy of major neuronal classes in the adult mouse forebrain. *Nature neuroscience* *9*, 99-107.
- Sumbul, U., Song, S., McCulloch, K., Becker, M., Lin, B., Sanes, J.R., Masland, R.H., and Seung, H.S. (2014). A genetic and computational approach to structurally classify neuronal types. *Nature communications* *5*, 3512.
- Sylwestrak, E.L., and Ghosh, A. (2012). Elfn1 regulates target-specific release probability at CA1-interneuron synapses. *Science* *338*, 536-540.
- Takahashi, H., and Craig, A.M. (2013). Protein tyrosine phosphatases PTPdelta, PTPsigma, and LAR: presynaptic hubs for synapse organization. *Trends in neurosciences* *36*, 522-534.
- Takahashi, S., Lin, H., Geshi, N., Mori, Y., Kawarabayashi, Y., Takami, N., Mori, M.X., Honda, A., and Inoue, R. (2008). Nitric oxide-cGMP-protein kinase G pathway negatively regulates vascular transient receptor potential channel TRPC6. *The Journal of physiology* *586*, 4209-4223.

- Takemura, S.Y., Bharioke, A., Lu, Z., Nern, A., Vitaladevuni, S., Rivlin, P.K., Katz, W.T., Olbris, D.J., Plaza, S.M., Winston, P., *et al.* (2013). A visual motion detection circuit suggested by *Drosophila* connectomics. *Nature* *500*, 175-181.
- Tamamaki, N., and Tomioka, R. (2010). Long-Range GABAergic Connections Distributed throughout the Neocortex and their Possible Function. *Frontiers in neuroscience* *4*, 202.
- Tang, F., Barbacioru, C., Wang, Y., Nordman, E., Lee, C., Xu, N., Wang, X., Bodeau, J., Tuch, B.B., Siddiqui, A., *et al.* (2009). mRNA-Seq whole-transcriptome analysis of a single cell. *Nature methods* *6*, 377-382.
- Taniguchi, H., He, M., Wu, P., Kim, S., Paik, R., Sugino, K., Kvitsiani, D., Fu, Y., Lu, J., Lin, Y., *et al.* (2011). A resource of Cre driver lines for genetic targeting of GABAergic neurons in cerebral cortex. *Neuron* *71*, 995-1013.
- Taniguchi, H., Lu, J., and Huang, Z.J. (2013). The spatial and temporal origin of chandelier cells in mouse neocortex. *Science* *339*, 70-74.
- Tao, Y., Chen, Y.J., Shen, C., Luo, Z., Bates, C.R., Lee, D., Marchetto, S., Gao, T.M., Borg, J.P., Xiong, W.C., *et al.* (2013). Erbin interacts with TARP gamma-2 for surface expression of AMPA receptors in cortical interneurons. *Nature neuroscience* *16*, 290-299.
- Tasic, B., Menon, V., Nguyen, T.N., Kim, T.K., Jarsky, T., Yao, Z., Levi, B., Gray, L.T., Sorensen, S.A., Dolbeare, T., *et al.* (2016). Adult mouse cortical cell taxonomy revealed by single cell transcriptomics. *Nature neuroscience* *19*, 335-346.
- Touzot, A., Ruiz-Reig, N., Vitalis, T., and Studer, M. (2016). Molecular control of two novel migratory paths for CGE-derived interneurons in the developing mouse brain. *Development* *143*, 1753-1765.
- Traynelis, S.F., Wollmuth, L.P., McBain, C.J., Menniti, F.S., Vance, K.M., Ogden, K.K., Hansen, K.B., Yuan, H., Myers, S.J., and Dingledine, R. (2010). Glutamate receptor ion channels: structure, regulation, and function. *Pharmacological reviews* *62*, 405-496.
- Trimmer, J.S. (2015). Subcellular localization of K<sup>+</sup> channels in mammalian brain neurons: remarkable precision in the midst of extraordinary complexity. *Neuron* *85*, 238-256.
- Tsang, S.Y., Ng, S.K., Xu, Z., and Xue, H. (2007). The evolution of GABAA receptor-like genes. *Molecular biology and evolution* *24*, 599-610.
- Uoskin, D., Furlan, A., Islam, S., Abdo, H., Lonnerberg, P., Lou, D., Hjerling-Leffler, J., Haeggstrom, J., Kharchenko, O., Kharchenko, P.V., *et al.* (2015). Unbiased classification of sensory neuron types by large-scale single-cell RNA sequencing. *Nature neuroscience* *18*, 145-153.
- Vacher, H., Mohapatra, D.P., and Trimmer, J.S. (2008). Localization and targeting of voltage-dependent ion channels in mammalian central neurons. *Physiological reviews* *88*, 1407-1447.
- Vacher, H., and Trimmer, J.S. (2011). Diverse roles for auxiliary subunits in phosphorylation-dependent regulation of mammalian brain voltage-gated potassium channels. *Pflugers Archiv : European journal of physiology* *462*, 631-643.
- Vergnano, A.M., Rebola, N., Savtchenko, L.P., Pinheiro, P.S., Casado, M., Kieffer, B.L., Rusakov, D.A., Mulle, C., and Paoletti, P. (2014). Zinc dynamics and action at excitatory synapses. *Neuron* *82*, 1101-1114.
- Wang, K.H., Brose, K., Arnott, D., Kidd, T., Goodman, C.S., Henzel, W., and Tessier-Lavigne, M. (1999). Biochemical purification of a mammalian slit protein as a positive regulator of sensory axon elongation and branching. *Cell* *96*, 771-784.
- Wang, Y., Toledo-Rodriguez, M., Gupta, A., Wu, C., Silberberg, G., Luo, J., and Markram, H. (2004). Anatomical, physiological and molecular properties of Martinotti cells in the somatosensory cortex of the juvenile rat. *The Journal of physiology* *561*, 65-90.
- Woodruff, A., and Yuste, R. (2008). Of mice and men, and chandeliers. *PLoS biology* *6*, e243.
- Yang, X., Cao, P., and Sudhof, T.C. (2013). Deconstructing complexin function in activating and clamping Ca<sup>2+</sup>-triggered exocytosis by comparing knockout and knockdown phenotypes.

Proceedings of the National Academy of Sciences of the United States of America *110*, 20777-20782.

- Ye, X., and Carew, T.J. (2010). Small G protein signaling in neuronal plasticity and memory formation: the specific role of ras family proteins. *Neuron* *68*, 340-361.
- Yoshida, T., Inoue, R., Morii, T., Takahashi, N., Yamamoto, S., Hara, Y., Tominaga, M., Shimizu, S., Sato, Y., and Mori, Y. (2006). Nitric oxide activates TRP channels by cysteine S-nitrosylation. *Nature chemical biology* *2*, 596-607.
- Yu, F.H., and Catterall, W.A. (2004). The VGL-chanome: a protein superfamily specialized for electrical signaling and ionic homeostasis. *Science's STKE : signal transduction knowledge environment* *2004*, re15.
- Zamponi, G.W., Striessnig, J., Koschak, A., and Dolphin, A.C. (2015). The Physiology, Pathology, and Pharmacology of Voltage-Gated Calcium Channels and Their Future Therapeutic Potential. *Pharmacological reviews* *67*, 821-870.
- Zeisel, A., Munoz-Manchado, A.B., Codeluppi, S., Lonnerberg, P., La Manno, G., Jureus, A., Marques, S., Munguba, H., He, L., Betsholtz, C., *et al.* (2015). Brain structure. Cell types in the mouse cortex and hippocampus revealed by single-cell RNA-seq. *Science* *347*, 1138-1142.
- Zhao, Y., Flandin, P., Long, J.E., Cuesta, M.D., Westphal, H., and Rubenstein, J.L. (2008). Distinct molecular pathways for development of telencephalic interneuron subtypes revealed through analysis of Lhx6 mutants. *The Journal of comparative neurology* *510*, 79-99.
- Zhou, X.B., Arntz, C., Kamm, S., Motejlek, K., Sausbier, U., Wang, G.X., Ruth, P., and Korth, M. (2001). A molecular switch for specific stimulation of the BKCa channel by cGMP and cAMP kinase. *The Journal of biological chemistry* *276*, 43239-43245.

## 1 **FIGURE LEGENDS**

### 2 **Main figures**

#### 3 **Figure 1. Workflow of transcriptomic analysis of cortical GABAergic ground** 4 **truth populations**

5 **(A)** Schematic of 6 major neocortical GABAergic cell types with characteristic cellular and  
6 subcellular innervation patterns. ChC: chandelier cells, PVC: PV basket cells, LPC: long  
7 projection cells, MNC: Martinotti cells, ISC: interneuron selective cells, CCKC: CCK basket  
8 cells. Molecular markers that label or include these cell types are shown in parenthesis.

9 Combinatorial driver lines that capture each population are shown in Figure S1.

10 **(B)** Cortical GABAergic neurons comprise 3 non-overlapping populations labeled by PV, SST  
11 and 5HTR3A. Within these, 6 ground truth populations (GTPs) are labeled by lineage or  
12 combinatorial markers that include bona-fide cell types shown in (A).

13 **(C)** Experimental workflow. From transgenic mice containing genetically labeled GTPs, fresh  
14 coronal brain sections containing cingulate, somatosensory and motor areas were microdissected  
15 and dissociated to single cell suspension. Individual RFP-labeled neurons were manually sorted.  
16 Single neurons were reverse transcribed with unique molecular identifiers and pooled for  
17 amplification using two rounds of in-vitro transcription followed by multiplexed cDNA library  
18 generation and Illumina sequencing.

19 **(D)** Bioinformatics pipeline showing read mapping, replicate handling, duplicate read  
20 elimination by counting unique tags, normalization and deriving Fisher's meta-analytic p-value  
21 for differentially expressed (DE) transcripts in each GTP. DE heatmap shows 183 genes across  
22 GTPs as absolute reads or, unique transcripts per million (uTPM) counts. ChCs are split into  
23 layer 2/3 (CHC1) and layer 5/6 (CHC2) groups.

24 **(E)** Barplots showing uTPM values of known markers for individual cells from each GTP  
25 (colored): *Lhx6*, *Sox6* and *Satb1*, for MGE and *Htr3a*, *Nr2f2*, *Prox1*, for CGE populations (left).  
26 Expression of other markers used for combinatorial targeting of GTPs matched perfectly in  
27 expected cell populations (right). Y-axis denotes unique mRNA copies in uTPM.

28 **(F)** Barplot of novel cell type markers for each GTPs; y-axis: uTPM counts. Note that CHC1  
29 and CHC2 express distinct molecular markers.

30 **(G)** Fluorescent mRNA in-situ hybridization showing that a candidate CHC1 marker *Pthlh* (grey  
31 arrowheads) co-localizes with genetically labeled CHCs (tdTomato reporter gene in a  
32 *Nkx2.1;Ai14* mouse tamoxifen-induced at E17.5, yellow arrowheads) (left). Two representative  
33 sections from serial 3D reconstruction of the forebrain of show >95% *Ai14* cells are *Pthlh*  
34 positive (right). Additional in-situ data in Figure S1.

35

#### 36 **Figure 2. A computation genomic screen identifies gene families and** 37 **categories that distinguish and characterize GTPs**

38 **(A)** Schematic of bioinformatic pipeline for MetaNeighbor. Single cells gene expression values  
39 for gene ensembles (e.g. gene sets A and B) are used to construct cell-cell networks based on  
40 similarity of co-expression, such that cells similar in gene expression space are close neighbors

1 shown by connecting lines. Cell identity (i.e. GTP identity) labels inherent to single cells (shown  
2 as colors) are then withheld and its identity inferred based on connectivity to its immediate  
3 neighbors. The aggregate probability of being identified as the correct GTP is reported as  
4 AUROC (area under receiver operator curve) score - the probability that a cell was correctly  
5 assigned to its GTP identity, where AUROC=0.5 represents chance performance. Depending on  
6 the gene set used some networks perform better in the classification task. By iterating the process  
7 through collection of gene sets grouped by gene ontology (GO) or Human Genome  
8 Nomenclature Consortium (HGNC) families or custom categories, a ranked list of AUROC for  
9 all such gene sets is generated.

10 **(B)** Left: Frequency distribution histogram of AUROC values of ~3800 GO terms. Red bars  
11 indicate GO-terms that performed with AUROC>0.8. Black dotted line indicate chance  
12 performance (AUROC=0.5). Right: a probability density function plot showing GO-terms  
13 containing keyword “synaptic”(red) and “cell-adhesion”(green) have rightward skewed  
14 distributions of AUROC>0.8 compared to the probability density of all terms (black).

15 **(C)** Left: Histogram of 442 HGNC gene families shows ~7% have a GTP identity prediction  
16 value exceeding AUROC=0.8. Right: High-performance gene families with AUROC>0.8 mainly  
17 comprise six gene categories.

18 **(D)** Schematic showing that gene products encoded by the high-performance gene families  
19 (except transcription factors) primarily localize along cell and synaptic membrane; they mainly  
20 contribute to synaptic connectivity and signaling.

21 **(E)** High-performance gene families constitute 5 layers of functional categories that organize  
22 synaptic connectivity and input-output signaling.

23 **(F)** MetaNeighbor analysis of two independent single cell transcriptome datasets yields the same  
24 rank order of HGNC gene families, suggesting that these gene sets are a fundamental feature of  
25 GABAergic neuron identity.

26 Abbreviations: GPCR, G-protein coupled receptor; SV, synaptic vesicle; DCV, dense core  
27 vesicle; KV, voltage-gated potassium channel; CaV, voltage-gated Ca<sup>2+</sup> channel; Syt,  
28 Synaptotagmins; Cplx, Complexins; CaBP, Calcium binding protein; CAMs, cell adhesion  
29 molecules; GluR, glutamate receptor; GABA<sub>A</sub>R, GABA-A receptor; G<sub>α,β,γ</sub>, Trimeric G-protein  
30 subunits α,β,γ; AC, Adenylate cyclase; PTP, Protein tyrosine phosphatase, sGC, soluble  
31 Guanylate cyclase; RGS, Regulator of G-protein signaling; PDE, Phosphodiesterase; PLC,  
32 Phospholipase C, RAS-GEF, Ras Guanine nucleotide exchange factor; Rho-GEF, Rho Guanine  
33 nucleotide exchange factor; IP<sub>3</sub>, Inositol triphosphate; DAG, Diacyl glycerol; RAS, Ras GTPase;  
34 Rho, Rho GTPase; CamK, Calcium/Calmodulin dependent protein kinase; PKG, Protein kinase  
35 G, PKA, Protein kinase A, MAPK, Mitogen activated protein kinase, ROCK/LIMK, Rho  
36 associated kinase/ LIM kinase.

37

### 38 **Figure 3: Differential expression of cell adhesion molecules and carbohydrate** 39 **modifying enzymes among GTPs**

40 **(A)** Schematic representation of the specificity of synaptic connectivity. A single GABAergic  
41 neuron receives multiple sources of excitatory (GLU), inhibitory (GABA) and modulatory (Mod)  
42 inputs at different subcellular locations and innervates large sets of pyramidal neurons (PyN) and  
43 interneurons (IN). Blue shading denotes extracellular matrix.

- 1 (B) Multiple families of cell adhesion molecules, synaptic adhesion molecules, and glycoproteins  
2 provide specific extracellular coating, cell surface and synaptic labels.
- 3 (C) Approximately 200 different cell adhesion molecule genes are expressed in each GTPs  
4 estimated by a sliding absolute expression value thresholds or by using 10% of maximum  
5 expression value as a dynamic cutoff.
- 6 (D) Major categories of ligand-receptor cell adhesion systems and their demonstrated roles in  
7 synaptic connectivity. All these adhesion systems are highly discriminative of GTPs as indicated  
8 by their high AUROC scores. Number of “+” is an assessment of the degree of involvement in  
9 the listed function.
- 10 (E) Heatmap showing 136 cell-adhesion molecules that are differentially expressed across the  
11 six GTPs.
- 12 (F) Eight different cell adhesion systems and two families of carbohydrate modifying enzymes  
13 (shown in individual heatmaps) are each differentially expressed among GTPs.
- 14 Abbreviations: SV, synaptic vesicle; Cdh, Cadherin; PTP, protein tyrosine phosphatase; Nrnx,  
15 Neurexin; Pcdh, Protocadherin; Robo, Roundabout; IgCAM, Cell adhesion molecules of the  
16 immunoglobulin superfamily; Sema, Semaphorin; Slitrk, SLIT And NTRK Like Family  
17 Member; GABAR, GABA receptor; Lphn1, Laterophilin1; LRRTM, Leucine Rich Repeat  
18 Transmembrane proteins; Nlgn, Neuroligin; Slit, Slit Guidance Ligand; Plxn, Plexin.
- 19

20 **Figure 4: Differential expression of transmitters and modulatory receptors**  
21 **among GTPs.**

- 22 (A) Schematic of various excitatory, inhibitory and modulatory receptors expressed on a generic  
23 GABAergic neuron.
- 24 (B) Schematic of glutamate receptor core subunits and auxiliary proteins that together form  
25 native receptors with specific localization, trafficking and biophysical properties.
- 26 (C) Heatmap showing differential expression of AMPAR core subunits and auxiliary proteins  
27 across GTPs; SST;CR cells express the greatest diversity of AMPARs.
- 28 (D) Top: SST;CR cells show highest Gria1 (GluA1)/Gria2(GluA2) ratio among GTPs. Bottom:  
29 Most GABAergic neurons have more Grin2b (GluN2B) than Grin2a (GluN2A) receptors but the  
30 reverse is true in SST neurons.
- 31 (E) Select boxplots of AMPAR core and auxiliary subunits shows striking level differences  
32 among GTPs; y-axis in uTPM counts.
- 33 (F) Select boxplots of NMDA subunits; glycine-activated Grin3a (GluN3A) is highly expressed  
34 in SST;CR cells.
- 35 (G) Schematic summary of GABA<sub>A</sub>R subunit expression among GTPs deduced from combining  
36 transcriptome analysis and literature information. Note that particular GABA<sub>A</sub>R subtypes may  
37 match specific types of presynaptic GTP terminals. PV and SST/CR cells, respectively, have the  
38 most and least diverse GABA<sub>A</sub>Rs and inhibitory inputs.
- 39 (H) Top: Schematic of the pentameric subunit composition of GABA<sub>A</sub>R and ligand binding sites.  
40 Bottom: Differential expression of  $\alpha$ ,  $\beta$  and  $\gamma$  subunits and the stoichiometric constraints of their  
41 pentameric combinations determine the possible diversity of GABA<sub>A</sub>R subtypes within a GTP;  
42 note that PV and SST/CR cells have the most and least diverse diversity, respectively.

- 1 (I) Select boxplots showing subunit level differences among GTPs. PV cells have the highest  
2 levels of  $\alpha 1$ ,  $\alpha 4$ ,  $\alpha 5$  and also the inhibitory postsynaptic scaffolding protein Gphn (Gephyrin).  
3 (J) Schematic comparison of the neuromodulatory receptors among PV and CCK basket cells  
4 and SST;NOS1 long projecting neurons.  
5 (K) Heatmap of neuromodulatory receptors showing differential expression among GTPs;  
6 SST;NOS1 and VIP;CCK cells shows the highest diversity.  
7 (L) Select boxplot showing that CGE-derived interneurons tend to express more  
8 neuromodulatory receptors types compared to MGE-derived interneurons.  
9 (M) Select boxplots of neuromodulatory receptors specific to or enriched in SST;NOS1 cells.  
10 (N) Differential expression of orphan GPCRs among GTPs shown as heatmap (left) and boxplots  
11 (right).  
12

13 **Figure 5: Differential expression of signaling proteins in several 2<sup>nd</sup>**  
14 **messenger pathways customizes intracellular signaling in GTPs**

- 15 (A) A simplified schematic summary showing that the Ca, cAMP, cGMP, Ras and Rho signaling  
16 pathways are differentially configured among GTPs. While the core skeletons of signal  
17 transduction machineries, kinase cascades and effectors are common among GTPs (grey, with  
18 low AUROC scores), a small set of regulatory signaling proteins (red) are strikingly  
19 differentially expressed with high AUROC values.  
20 (B) Schematic of a GPCR signaling module illustrating that while multiple components (grey)  
21 are common among GTPs, different members of key regulatory proteins such as RGS, Adenylate  
22 cyclases (AC), Phosphodiesterases (PDE) and A-kinase anchoring proteins (AKAPs) are  
23 differentially expressed and likely customize the specificity and spatiotemporal dynamics of  
24 cAMP signaling.  
25 (C) Boxplots showing that different combinations of RGS, AC and PDE members are enriched  
26 in individual GTPs.  
27 (D) Heatmap of several classes of signaling proteins with high AUROC scores shown in 5A.  
28 (E) Enhanced NO-cGMP signaling in SST;NOS1 and CHC cells. The entire pathway of NO  
29 synthesis and cGMP production (guanylyl cyclase), degradation (PDE), kinase signaling (PKG)  
30 and putative phosphorylation targets are coherently and specifically expressed or enriched in  
31 SST;NOS1 cells as well as CHC cells.  
32 (F) Boxplots show differential expression in key components of NO-cGMP signaling (depicted  
33 in 5E) among GTPs; note ON/OFF patterns or dramatic level differences.  
34

35 **Figures 6: Differential expression of neuropeptides and vesicle release**  
36 **machinery shape distinct outputs and release styles in GTPs**

- 37 (A) Schematic of vesicular release machinery for synaptic vesicle (SV for neurotransmitters),  
38 dense core vesicle (DCV for neuropeptides) and large dense core vesicle (LDCV for protein  
39 hormones). Putative Syt members implicated in these release machines are listed.  
40 (B) Top: Each GTP is estimated to express between 20-30 peptides (both unique and common)  
41 based on either a sliding threshold of transcript counts (20-50 uTPMs) or dynamic threshold



1 (10% of maximum expression value). Bottom: heatmap shows highly differential expression of  
2 endogenous ligands that constitute a neuropeptide code for GTPs.  
3 **(C)** Bubble-plot of fraction of individual cells expressing the most commonly expressed  
4 neuropeptides among GTPs. Size of dots represents fraction (see key at bottom left).  
5 **(D)** Select boxplots showing highly distinct ON/OFF expression of specific neuropeptides in  
6 each GTP. Endogenous Ligands is the top gene family (AUROC=0.96) that best distinguishes  
7 GTPs.  
8 **(E)** Left: Schematic of role of PTN in promoting differentiation of oligodendrocyte precursors  
9 for axonal myelination. PTN expression in SST;NOS1 long projection cells predict myelination  
10 of their axons similar to excitatory projection neurons. Right: Confirmation of myelination of  
11 SST;NOS1 cell axon. 3D render of super-resolution images shows a deep layer RFP-expressing  
12 SST;NOS1 axon myelinated by CASPR-labeled oligodendrocyte processes. SST;NOS1 axons  
13 are immune-labeled with anti-tdTomato antibody (red) in Sst-Flp;Nos1-CreER; Ai65 animals  
14 and co-labeled with anti-CASPR (green). Angular rotation shows coaxial apposition of  
15 SST;NOS1 axon and CASPR validating the myelination (white arrows). See Fig-S6 for  
16 expanded angular views.  
17 **(F)** Schematic showing that Zn may be co-released with GABA specifically from SST;CR  
18 terminals. While GABA acts on GABA<sub>A</sub>Rs, Zn may act on nearly non-synaptic NMDARs and  
19 influence glutamatergic transmission. Boxplots show high level and specific expression of the Zn  
20 vesicular transporter Slc30a3 (Znt3) in SST;CR cells, which also contain the Zn uptake importers  
21 Slc39a1 and Slc39a7 (Zip1, Zip7)  
22 **(G)** Differential expression of vesicle release machinery components suggest different release  
23 styles in Ca<sup>2+</sup> sensitivity and dynamics among GTPs.  
24 **(H)** Scatter plots of mRNA levels (uTPMs) of Snap25 vs Rab3a (left) and Snap25 vs NSF  
25 (right).  
26 **(I)** Heatmap of Synaptotagmin and Complexin gene families shows selective expression in  
27 GTPs.  
28 **(J)** Scatterplot of Cplx1 Vs Cplx2 levels (uTPMs) show that fast-release synapses of PV and  
29 CHC are biased towards Cplx1 whereas slow-release synapses of VIP;CCK cells mainly utilize  
30 Cplx2.  
31 **(K)** Comparison summary diagram of PV and VIP;CCK basket cells with contrasting GABA  
32 release styles provides molecular correlates of fast-synchronous and slow-sustained vesicle  
33 release mechanisms.  
34

35 **Figure 7: Transcription factor profiles register the developmental history and**  
36 **contribute to the maintenance of GTP phenotypes**

37 **(A)** Schematic representation of the developmental trajectory of cortical GABAergic neuron,  
38 using PV cells as an example. TFs reported to express at different stages of PV cell development  
39 are shown.  
40 **(B)** Schematic summary of MGE and CGE transcription cascades that regulate the development  
41 of different clades of cortical GABAergic neurons including GTPs  
42 **(C)** Each GTP is estimated to express ~400 TFs based on sliding thresholds mRNA counts (20-  
43 50 uTPMs) or dynamic thresholds (10% of maximum expression value).

1 **(D-G)** Bubble-plot showing fraction of cells expressing a given TF at 10% of maximum  
2 expression value. Accompanying boxplots show expression levels of selected TFs, y-axis in  
3 uTPM. **(D)** Major TFs in subpallium progenitors and GABA neuron precursor maintain their  
4 expression in GTPs in adult cortex.  
5 **(E)** TFs expressed in early postmitotic MGE- and CGE- derived neuron maintain expression  
6 within same clade of GTPs. Embryonic expression of *Tox* and *Nfi* family TFs were deduced  
7 from our transcriptome analysis of GTPs and confirmed in (I).  
8 **(F)** Among MGE-derived GTPs, subsets of TFs are preferentially expressed in PV (PV>SST) or  
9 SST (PV<SST) subpopulations; CGE groups are not compared and shown in light shade.  
10 Representative boxplot shown to the right.  
11 **(G)** Within the PV, SST and VIP group, subsets of TFs are enriched in one or the other GTP;  
12 GTPs that are not compared are shown in light shade.  
13 **(H)** Heatmap showing differential expression of TFs largely exclusive to each GTP; boxplots  
14 show several examples of ON/OFF TF expression exclusive in a GTP at indicated levels  
15 (uTPM).  
16 **(I)** Retrospective screen of Allen Developmental Mouse Brain in-situ database reveals that  
17 several TFs that express in MGE- or CGE- derived GTPs identified by transcriptome analysis  
18 indeed begin their expression in the corresponding embryonic germinal zone.  
19 **(J)** Schematic of the *Ppargc1α* (*PGC1α*) transcription regulatory network which is highly  
20 enhanced in PV cells. Multiple reported *PGC1α* upstream TFs activators, cofactors and large  
21 fraction of (>75%) of reported downstream effectors are enriched over 1.5 folds in PV cells  
22 ( $p < 5.0 \cdot 10^{-07}$ ). See Figure S7 for a detailed comparison of known *PGC1α* targets and their  
23 differential expression in PV cells. Boxplots show different expression levels of select sets of  
24 *PGC1α* co-factors and targets and putative targets among GTPs.

## 25 **Supplementary figures**

### 26 **Figure S1. Transcriptomic analysis of cortical GABAergic ground truth** 27 **populations**

28 **(A)** Combinatorial genetic labeling of cortical GABAergic GTPs. Intersectional, lineage and  
29 birth time dependent labeling (top row) of 6 GTPs and bona fide types with characteristic  
30 laminar distribution (middle row). Representative single cell reconstruction depicted  
31 characteristic morphology of bona fide cell type in each GTP (bottom row).  
32 **(B)** Histogram of total mapped reads per single cell with a median read depth of  $4.0 \times 10^5$  reads  
33 per cell.  
34 **(C)** Histogram of unique reads per single cell with a median of  $1.0 \times 10^5$  counts.  
35 **(D)** Plot of ERCC observed unique reads versus the numbers of molecules expected for each  
36 species from the ERCC cocktail shows linearity and slope close to 1; unity line shown as dotted  
37 grey line, blue shaded region shows 95% confidence interval.  
38 **(E)** Number of genes detected in single cells versus total mapped reads and  
39 **(F)** unique reads shows that gene detectability is correlated to read counts but there are no gene  
40 detection bias towards any of the GTPs (color code as in A).  
41 **(G)** Genes detected across GTPs range between 7.5 – 12 thousands (median).

1 (H) Higher levels of genes detected in single cells compared to GSE60361 (Zeisel et al., 2015)  
2 and GE71585 (Tasic et al., 2016) dataset.

### 3 **Figure S2. Fluorescent double in-situ in brain tissue confirms co-localization** 4 **of select enriched transcripts in GTPs.**

5 (A) Left: Partial 3D reconstruction render from serial coronal sections (spanning 288um, rostro-  
6 caudal) of mouse forebrain showing double mRNA in situ of CHC enriched transcript Pthlh  
7 (red), Ai14/tdTomato (green) and co-localization (yellow). Only a subset of CHCs were labeled  
8 in *Nkx2.1-CreER;Ai14* mice by tamoxifen induction at E17. Right: representative sections from  
9 3D render. 136/143 tdTomato<sup>+</sup> (~95%) co-express Pthlh. Laminal distribution of Pthlh signal  
10 was similar to those reported for ChC distribution pattern (Taniguchi et. al. 2013).

11 (B) Representative single images from double RNA in situ of Ai14/tdTomato (green) shows co-  
12 localization (yellow) with select transcripts enriched in CHC2 and (*Unc5b, Hapln1*) SST;NOS1  
13 cells (*Ptn, Slc7a3, Tacr1, Gpr88, Hhip, Cdh1* and *Hrt7*). Dotted box represents area in higher  
14 magnification, arrowheads indicate co-localization.

### 15 **Figure S3: Differential expression of netrin-unc5 and carbohydrate modifying** 16 **enzymes among GTPs**

17 (A) Schematic depiction of known attractive (+) and repulsive (-) interactions between the ligand  
18 Netrin (*Ntn1*) and its receptors - *Unc5* family members and DCC (Kolodkin et al., 2011).

19 Boxplots show highly specific expression of *Ntn1* and *Unc5* family members among GTPs.

20 (B) Boxplots of CAM modifying enzymes Sulfo- and Sialyl-transferases enriched in individual  
21 GTPs. (C) Representative in situ images from Allen Brain Atlas showing distinct laminar  
22 distribution patterns of some carbohydrate modifying enzymes in coronal brain sections. Many  
23 of these patterns are characteristic to the distribution of subsets of GABAergic neurons.

### 24 **Figure S4: Differential expression of voltage-gated ion channels among GTPs**

25 (A) An unrooted cladistic representation drawn using minimum evolution analysis of 143  
26 members of structurally related voltage-gated ion channels based on their amino acid sequence  
27 of the minimal pore regions adopted without structural manipulations (modified from Yu and  
28 Catterall, 2004). Only three of these families, Kv, NaV and CaV are highly discriminative of  
29 GTPs as shown by their AUROC scores (boxed, red text shows high scoring families).

30 (B) Schematic of the subcellular distribution of voltage gated ion channels and their subunit  
31 compositions of pore forming and accessory regulatory proteins.

32 (C) Heatmap and selected boxplots showing differential expression of Kv channels and their  
33 regulatory subunits among GTPs. Fast-spiking PV basket cells express the highest levels and  
34 diversity of Kv channels.

35 (D) Heatmap and selected boxplots showing differential expression of CaV channels.

36 (E) Heatmap and selected boxplots showing differential expression of NaV channels. Fast-  
37 spiking PV basket cells express the highest levels and diversity of Nav channels

### 38 **Figure S5:**

39 (A) Selected RNA in-situ images from Allen Brain showing that multiple phosphodiesterases are  
40 expressed in restricted neuronal populations in adult mouse cortex with patterns characteristic to  
41 GABAergic interneurons.

1 **(B-D)** Boxplots for Ras **(B)**, Rho-GEF **(C)**, and EF-hand/CaBP **(D)** family members among  
2 GTPs.

3 **Figure S6: SST;NOS1 axons are myelinated.**

4 **(A)** Barplot of neuropeptides and endogenous ligands expressed in ON/OFF pattern in individual  
5 cells of each GTP (colors).

6 **(B)** Left: 63X image shows SST;NOS1 axons traversing deep cortical layers, among a field of  
7 myelin nodes labeled by CASPR immunostaining. Dotted box is enlarged in the right 3 panels,  
8 which show 3D rendering of higher magnification images and coaxially apposed CASPR signal  
9 over tdTomato-labeled axons of SST;NOS1 at three angular rotations (white arrows).

10 **Figure S7: Transcription factor profiles among GTPs and PGC1 $\alpha$  transcription**  
11 **network.**

12 **(A)** Top: Venn diagram of all TFs expressed in each GTP; TFs were assigned to a set if it is  
13 expressed in  $\geq 75\%$  of cells within a GTP at a level of  $\geq 30$ uTPM in single cells. Common TFs in  
14 MGE and CGE derived GTPs are further intersected to generate a list of common GABAergic  
15 TFs. Bottom: Table of TFs in each set, green fonts indicate TFs known to be expressed as  
16 computed from the Venn diagram.

17 **(B)** Barplots of TFs expressed in ON/OFF pattern in individual cells of GTPs

18 **(C)** mRNA in situ Images from Allen Developmental Mouse Brain Atlas at E13.5 show  
19 expression of transcripts in the MGE that are expressed in PV<SST and SST;CR and SST;NOS1  
20 from Fig-7F and G.

21 **(D)** Table showing that  $>75\%$  of PGC1 $\alpha$  targets identified by Lucas et. al. 2014 are also  
22 significantly ( $p < 1 \times 10^{-05}$ ) enriched in PVC transcriptome data.

## 1 **List of Supplementary Tables**

- 2 Table S1. DE table of genes in Fig1D, FC>4, uTPM>50, q value<5.0 X 10<sup>-4</sup>, batches>80%
- 3 Table S2. DE table of high performance CAMs in Fig3E
- 4 Table S3. AUROCs values for ~3888 GO gene sets
- 5 Table S4. AUROC scores of ~450 HGNC gene families from 3 studies (Paul et. al., Tasic et. al.  
6 2016 and Zeisel. et. al. 2015)
- 7 Table S5. AUROC scores of custom gene sets used

## 1 **Methods**

### 2 **Contact for reagent and resource sharing**

3 Dr. Z. Josh Huang, [huangj@cshl.edu](mailto:huangj@cshl.edu)

### 4 **Animals**

5 Nkx2.1-CreER, Pv-ires-Cre animals were bred separately to Ai14 reporter to label CHC and  
6 PVBC in the cortex. CHCs were enriched in frontal cortex with tamoxifen induction at E17.5.  
7 Intersectional labeling of GTPs were achieved by breeding (a) Sst-Flp, Nos1-CreER, (b) Sst-Flp,  
8 CR-Cre, (c) VIP-Flp, CR-Cre and (d) VIP-Flp, CCK-Cre separately to Ai65 intersectional  
9 reporter that will label cells with tdTomato only when both the lox-Stop-lox and Frt-STOP-Frt  
10 cassettes are excised (see supplementary Fig-S1). Mice were bred and maintained according to  
11 animal husbandry protocols at Cold Spring Harbor Laboratory (Institutional Animal Care and  
12 Use Committee reference number 16-13-09-8) with access to food and water ad libitum and 12 h  
13 light-dark cycle.

### 14 **Manual cell sorting**

15 To isolate individual RFP-labeled GABAergic neurons, we microdissected motor and  
16 somatosensory cortical slices from fresh brain tissues of mature (6 weeks old) mice, generated  
17 single cell suspension and manually purified single RFP-labeled cells (Paul et al., 2012; Sugino  
18 et al., 2006). Brains were sectioned at 300  $\mu$ m thickness using a cooled stage vibratome  
19 (Microm, Model HM360) with circulating oxygenated artificial cerebrospinal fluid. Sections  
20 were blocked in AP5, CNQX, and TTX cocktail to prevent excitotoxic cell death and then  
21 treated with mild protease (Fraction IV protease Streptomyces, Sigma Cat#P5147-5G). Brain  
22 regions of interest were microdissected and triturated to dissociate the cells. Dissociated cells  
23 were put into in a Petri dish in low density for optimal cell-cell separation and single RFP-  
24 positive cells was collected using patch pipette capillary and dispensed individually into separate  
25 single tubes prefilled with RNaseOUT (Invitrogen), ERCC spike-in RNAs in 1:400 K dilution,  
26 sample specific RT primers for a total of 1  $\mu$ L volume. Process was repeated to collect 32-64  
27 cells in one manual cell sorting session. Cells were flash frozen in liquid nitrogen and stored at –  
28 80 °C until processed. Patch pipette was single use only and fresh pipettes were used for every  
29 single cell collected.

### 30 **Linear RNA amplification, Illumina library prep, and sequencing**

31 Single cell mRNAs were converted to cDNAs through polyA primers (Eberwine et. al. 1992)  
32 containing a sample barcode and unique molecular identifiers (UMIs). We employed two rounds  
33 of in vitro transcription amplification (Hashimshony et al., 2012; Jaitin et al., 2014) followed by  
34 Illumina TrueSeq protocol to construct RNAseq libraries.

35  
36 Custom T7-polyA primers with were designed containing additional 9bp error correcting  
37 sequences for identifying single cells (sample barcode) and 10bp random nucleotide sequences  
38 (UMI/variational tag) to label each mRNA molecule amplified with a unique barcode. The UMI  
39 allows for elimination of reads containing duplicate tags for the same mapped sequence and only  
40 tally up the total unique tags of all mapped sequence to a coding sequence. This primer also  
41 contained a 26bp flanking RA5 adapter sequence needed for downstream illumina cDNA library  
42 step, which eliminates a rate limiting enzymatic 5' ligation step of cDNA preparation increasing  
43 efficiency (Hashimshony et. al. 2012).

44  
45 RNA was linearly amplified by T7 RNA polymerase using two rounds of in-vitro transcription  
46 (MessageAmp-II kit Life Technologies) according to the manufacturer's recommended protocol

1 with some modifications. Cells were lysed by repeated heating to 70C and snap cooling to 4C  
2 and first strand synthesis was carried out at 42C for 2hrs with first strand buffer, dNTP mix,  
3 RNase inhibitor and ArrayScript enzyme. Second strand synthesis was done at 16C for 2hrs with  
4 second strand buffer, dNTP mix, T4 DNA polymerase and RNaseH. cDNA was purified using  
5 columns and first round IVT was performed at 37C for 14hrs to make aRNA. For the second  
6 round of linear amplification column purified aRNA from first IVT underwent another first  
7 strand synthesis at 42C for 2hrs, followed by RNaseH digestion at 37C for 30mins and another  
8 second strand synthesis at 16C. The resulting double stranded cDNA underwent a final second  
9 IVT step at 37C for 14hrs to make aRNA. These linearly amplified aRNA products now carried  
10 the 3'-end of the polyA transcripts for mapping to coding regions plus the sample barcode to  
11 indicate which GTP it came from, UMI sequence for counting unique cell-endogenous parent  
12 mRNA molecules and one of the flanking sequence (RA5 adapter) for Illumina sequencing.  
13 Second round aRNAs were fragmented chemically using NEBNext® Magnesium RNA  
14 Fragmentation Module (Cat#E6150S), column purified using RNA MinElute (Qiagen) for final  
15 Illumina cDNA library preparation steps.

16  
17 cDNA library was generated using Illumina TruSeq small RNA kit (Cat#RS-200-0012) and only  
18 3'-adapter (RA3) need to be ligated enzymatically using truncated T4 RNA ligase (NEB M0242)  
19 on to the fragmented aRNA and the 5' ligation step for RA5-adapter was skipped (Hashimshony  
20 et. al. 2012). Adapter ligated fragmented aRNA was reverse transcribed using SuperScriptIII  
21 reverse transcriptase (Invitrogen, USA) and PCR enriched using TruSeq indices (for  
22 multiplexing) for no more than 7–11 cycles. The resulting library was size-selected using  
23 SPRISelect magnetic beads (Agencourt) to select 350-450bp fragments and paired-end  
24 sequenced for 101bp in Illumina HiSeq. No more than 32 single cells were run in one lane of  
25 HiSeq2000 generating on average ~180-200 million reads per lane.

## 26 **Mapping and tag counting**

27 As in our previous work (Crow et al, 2016), Bowtie (v 0.12.7) was used for sequence alignment  
28 of read2 (polyA primed) to the mouse reference genome (mm9), while read1 sequences were  
29 used for UMI (varietal-tag) counting. A custom python script was used Bowtie (v 0.12.7) was  
30 used for sequence alignment of read2 (polyA primed) to the mouse reference genome (mm9),  
31 while read1 sequences were used for UMI (varietal-tag) counting. Multiple reads to the same  
32 gene with the same tag sequences were rejected and only counted as one, such that only mapped  
33 sequences with unique tags were retained and tallied for each mRNA for each cell.

34  
35 We obtained  $\sim 4.8 \times 10^5$  (median, Avg= $6.9 \times 10^5$ ) mapped reads per cell, each containing  
36  $\sim 1.0 \times 10^5$  (median, Avg= $1.4 \times 10^5$ ) unique reads that typically detected on average  $\sim 10,000$  genes  
37 (range  $\sim 7,500$  to  $\sim 12,000$  genes median), with  $>95\%$  of the single cells detecting  $>6,000$  genes  
38 (Figure S1B-C). In each single cell ERCC spike-in RNA (Life Technologies) were used as  
39 internal controls, for which the absolute number of molecules that are added to sample can  
40 be calculated; this gave a linear relationship of input-output measures with a slope of 0.92 and  
41 adjusted  $R^2=0.96$  (Figure S1D). Following quality control screen, we obtained high depth  
42 transcriptome of  $\sim 584$  cells from the 6 GTPs (Figure S1D). This unique dataset thus contains  
43 high-resolution transcriptomes of phenotype-defined cortical GABAergic GTPs.

44  
45 For any given gene the absolute unique counts were normalized to the total unique counts across  
46 all genes in a single cell and are expressed as unique Transcripts Per Million (uTPM). To  
47 determine differential gene expression (DE) and calculate fold-change, gene-wise Fisher's meta-  
48 analytic p-value was calculated on these normalized gene expression values without further batch  
49 effect correction.

## 1 Fisher's meta-analytic DE

2 To assess differential gene expression across GTPs, we took advantage of the replicate batches  
3 within each type and performed a meta-analysis across replicates based on non-parametric  
4 statistics. Briefly, for each GTP we performed one-tailed Mann-Whitney tests between  
5 individual batches within a cell type against all cells outside of that cell type. To ensure that  
6 significance would arise from replication rather than extreme p-values, prior to meta-analysis  
7 with Fisher's method, p-values at  $FDR \leq 0.05$  for an individual test were set to the maximum p-  
8 value meeting that criterion. Finally, meta-analytic p-values were FDR corrected. Differentially  
9 expressed gene sets were defined by FDR adjusted p-value  $< 0.05$  having  $\log_2$  fold change  $> 2$

## 10 MetaNeighbor (AUROC calculation)

11 To measure GTP identity we use the MetaNeighbor method as described in our companion paper  
12 (Crow et. al. 2017). In brief, MetaNeighbor requires the input of a set of genes, an expression  
13 matrix and two sets of labels: one set for labeling each experiment, and one set for labeling the  
14 cell types of interest. Here, each batch was treated as an "experiment", and we aimed to measure  
15 the replicability of cell identity across batches. Cell-type labels are held back from one  
16 experiment at a time and then predicted based on the others, to determine which gene sets  
17 functionally characterize cells across technical variation. For each gene set being used to  
18 evaluate a given cell-type, the method generates a network based on the Spearman correlation  
19 between all cells across the genes within the set. The correlation is rank standardized to provide  
20 network weightings between each pair of cells, and then a neighbor voting predictor scores cells  
21 as possessing a given annotation. The score is calculated as the sum of a given cell's  
22 connectivity weighting to neighbors possessing a given cell annotation. For cross-validation, we  
23 permute through all possible combinations of leave-one-batch-out cross-validation, and report  
24 the degree to which cells of the same type are recovered as the mean area under the receiver  
25 operator characteristic curve (AUROC) across all folds. To improve speed, AUROCs are  
26 calculated analytically:

$$27 \quad AUC_j = 1 - \left( \frac{\sum_{(i|Cell_i \in Cell\ type_j)} Ranks_i - \frac{N_{Pos} * (N_{Pos} + 1)}{2}}{N_{Pos} * N_{Neg}} \right)$$

28  
29

30 where "Ranks" are the ranks of the hidden positives,  $N_{pos}$  is the number of true positives, and  
31  $N_{Neg}$  is the number of true negatives. A Github repository containing R scripts and parsed data  
32 can be found online <https://github.com/maggiecrow/MetaNeighbor>.

33

34 Single cell mRNAs were converted to cDNAs through polyA primers containing a sample  
35 barcode and unique molecular identifiers (UMIs). We employed two rounds of in vitro  
36 transcription amplification (Hashimshony et al., 2012; Jaitin et al., 2014) followed by Illumina  
37 TrueSeq protocol to construct RNAseq libraries. Through next generation sequencing,  
38 we obtained  $\sim 4.8 \times 10^5$  (median,  $Avg = 6.9 \times 10^5$ ) mapped reads per cell, each containing  
39  $\sim 1.0 \times 10^5$  (median,  $Avg = 1.4 \times 10^5$ ) unique reads that typically detected on average  
40  $\sim 10,000$  genes (range  $\sim 7,500$  to  $\sim 12,000$  genes median), with  $> 95\%$  of the single cells  
41 detecting  $> 6,000$  genes (Figure S1B-C). In each single cell ERCC spike-in RNA (Life  
42 Technologies) were used as internal controls, for which the absolute number of molecules  
43 that are added to sample can be calculated; this gave a linear relationship of input-output  
44 measures with a slope of 0.92 and adjusted  $R^2 = 0.96$  (Figure S1D). Following quality control  
45 screen, we obtained high depth transcriptome of  $\sim 584$  cells from the 6 GTPs (Figure S1D).



1 This unique dataset thus contains high-resolution transcriptomes of phenotype-defined  
2 cortical GABAergic GTPs.

### 3 **RNA double in-situ and imaging**

4 RNA double in-situ was performed using Quantigene ViewRNA tissue ISH (Affymetrix, USA)  
5 following manufacturer's recommended protocol. Fresh unfixed brain tissues were frozen in  
6 OCT blocks using dry-ice isopentane slurry. Brains can be stored in -80C until cryosectioning.  
7 Cryosectioning was done on Leica cryotome at 12um thickness, and sections collected on  
8 charged glass slides. Custom and off-the shelf branched-DNA oligo ISH probes were designed  
9 and synthesized by Affymetrix Quantigene ViewRNA. Sections on slides were postfixed just  
10 prior to ISH, and in-situ steps were followed according to manufacturer's recommended  
11 protocol. For dual signal detection QuantiGene Type-1 and Type-6 probes were used.  
12 Fluorescent signals from Type-1 and Type-6 ISH probes were imaged on tile-scanning mode  
13 using Perkin Elmer spinning disk confocal at 10X magnification and auto-stitched using  
14 Volocity software. Stitched images were exported as TIFFs for further processing and  
15 adjustments to brightness and contrast in FIJI (Fiji is just ImageJ) and assembled in Adobe  
16 Illustrator.

### 17 **Super-resolution microscopy**

18 Super resolution images were acquired with GE Healthcare OMX V3 system using: 488 and 593  
19 nm solid state lasers; UPlanS Apochromat 100x1.4 NA objective lens (Olympus); 2 EM-CCD  
20 cameras (Cascade II 512, Photometrics). 3D structured illumination images were reconstructed  
21 with SoftWoRx® 6.5.2 software. 3D rendering was performed using Imaris (Bitplane) 7.6.5.  
22 exported as TIFF, processed in FIJI and assembled in Adobe Illustrator.

### 23 **Ethics**

24 Mice were bred and maintained according to animal husbandry protocols at Cold Spring Harbor  
25 Laboratory (Institutional Animal Care and Use Committee reference number 16-13-09-8).

### 26 **Glossary of terms**

- 27 • Neighbor voting – A method to classify cells into known types based on the similarity of  
28 the gene expression profiles for a given gene set.
- 29 • Cross-validation – A method to estimate how well the results of an analysis will  
30 generalize. The main purpose of cross-validation is to avoid overfitting to a particular dataset, or  
31 in this case, library batch. There are many ways to implement cross-validation; in this study we  
32 use a batch-stratified cross-validation. In this analysis, we hide labels from one batch at a time,  
33 making predictions as each label is hidden, until we have tested all of the batches within a  
34 particular cell type.
- 35 • Performance – The metric used to quantify cell identity. This refers to the area under the  
36 receiver operating characteristic curve (AUROC).

### 37 **Methods Reference:**

38 Crow, M., Paul, A., Ballouz, S., Huang, Z.J., and Gillis, J. (2016). Exploiting single-cell  
39 expression to characterize co-expression replicability. *Genome Biology* 17, 101.

40 Crow, M., Paul, A., Ballouz, S., Huang, Z.J., and Gillis, J. (2017). Addressing the looming  
41 identity crisis in single cell RNA-seq. bioRxiv 150524.

42 Hashimshony, T., Wagner, F., Sher, N., and Yanai, I. (2012). CEL-Seq: single-cell RNA-Seq by  
43 multiplexed linear amplification. *Cell reports* 2, 666-673.

- 1 Jaitin, D.A., Kenigsberg, E., Keren-Shaul, H., Elefant, N., Paul, F., Zaretsky, I., Mildner, A.,
- 2 Cohen, N., Jung, S., Tanay, A., et al. (2014). Massively parallel single-cell RNA-seq for
- 3 marker-free decomposition of tissues into cell types. *Science* 343, 776-779.
- 4 Paul, A., Cai, Y., Atwal, G.S., and Huang, Z.J. (2012). Developmental Coordination of Gene
- 5 Expression between Synaptic Partners During GABAergic Circuit Assembly in Cerebellar
- 6 Cortex. *Frontiers in neural circuits* 6, 37.
- 7 Sugino, K., Hempel, C.M., Miller, M.N., Hattox, A.M., Shapiro, P., Wu, C., Huang, Z.J., and
- 8 Nelson, S.B. (2006). Molecular taxonomy of major neuronal classes in the adult mouse
- 9 forebrain. *Nature neuroscience* 9, 99-107.

**Main Table 1. Molecular portraits of GABAergic Ground Truth Populations.**

|                                        | <b>PVC</b>                                                                                                                                                                                                                            | <b>CHC</b>                                                                                                                         | <b>CCKC</b>                                                                  | <b>MNC</b>                                                                                       | <b>ISC</b>                                                                 | <b>LPC</b>                                                                                                                                 |
|----------------------------------------|---------------------------------------------------------------------------------------------------------------------------------------------------------------------------------------------------------------------------------------|------------------------------------------------------------------------------------------------------------------------------------|------------------------------------------------------------------------------|--------------------------------------------------------------------------------------------------|----------------------------------------------------------------------------|--------------------------------------------------------------------------------------------------------------------------------------------|
| <b>Input - dendrite</b>                | Fast EPSP: <b>GluA1, A4</b><br>Fast IPSP: <b><math>\alpha</math>1GABAaR</b><br>Fast depolarization.: <b>Kv3 <math>\alpha</math>4, <math>\delta</math> GABAaRs</b> : axonal?<br>Neuromodulation: <b>Cckbr</b>                          | Not-as-fast input: <b>lower levels of GluA1, GluA4, <math>\alpha</math>1GABAaR, Kv3</b> compared to PVC                            | Neuromodulation: <b>Cnr1, Htr2c, Htr3a, Chrm3, Npy1r, Vipr1,</b>             | Glu input and plasticity: <b>high level diverse iGluRs; low level, few types GABAaRs</b>         | Neuromodulation: <b>Htr2c, Htr3a, Chrm3, Chrna4, Adra1b, Npy2r</b>         | weak Glu & GABA inputs: <b>low level, unusual GluRs &amp; GABAaRs;</b><br>strong modulation: <b>Chrm2, Gpr88, Oxt, Tacr1, Hertr1, Opn3</b> |
| <b>Signaling</b>                       | G-proteins: <b>RGS4</b> ,<br>cAMP: <b>Adcy8, Adcy1</b><br>small GTPase: <b>Ras111b, Arhgef10</b>                                                                                                                                      | NO-cGMP signaling: <b>Gucy1a3, Gucy1b3, Prkg1, Pde11a, Pde5a, Trpc5, Kcnmb2</b>                                                    | G-proteins: <b>Rgs12</b> , cAMP: <b>Adcy9, Pde7b</b>                         | G-protein: <b>RGS6, RGS7</b> ,<br>cAMP: <b>Adcy2, Pde2a</b>                                      | G-protein: <b>Rgs16, Rgs10, Rgs8</b> ,<br>cAMP: <b>Pde4b</b>               | NO-cGMP signaling: <b>Slc7a3, Nos1, Gucy1a3, Gucy1b3, Prkg2, Pde1a, Trpc6, Kcnmb4</b>                                                      |
| <b>Output - Axon, Synapse, release</b> | Fast AP initiation, propagation: <b>Nav1.1, Nav1.6, Nav1.7</b><br>Fast Ca signaling and buffering: <b>Cav2.1 P/Q type, PV</b><br>Fast Ca sensor: <b>Syt2, Syt7</b><br>Fast release: <b>Vamp1, Cplx1, high Snap25, Rab3a &amp; NSF</b> | Not-as-fast release: <b>Lower levels of Vamp1, Cplx1, Syt1, Syt2, Syt7</b> compared to PVC;<br><b>high Snap25, Rab3a &amp; NSF</b> | Slow asynchronous release: <b>Cplx2, Cplx3</b><br>LDCV release: <b>Syt10</b> | Possible co-release of GABA and zinc: <b>Vesicular zinc transporter Znt3; Zinc importer Zip1</b> | <b>Similar to CCKC</b>                                                     | Ca-independent <b>Syt4, Syt5, Syt6</b>                                                                                                     |
| <b>Peptides</b>                        | <b>Tac1, Adm, Rspn,</b>                                                                                                                                                                                                               | <b>Pthlh, Tgfb3, Fgf9</b>                                                                                                          | <b>Vip, Cck, Igf1, Edn3, Prok2, Pnoc, Crh, Tac2,</b>                         | <b>Sst, Inhbb, Nppe,</b>                                                                         | <b>Vip, Cck, Rspo1, Wnt5a, Nrtn</b>                                        | <b>Sst, Npy, Ptn, Wnt2, Rln1, Penk, Calca, Cort</b>                                                                                        |
| <b>Others</b>                          | Metabolism, mitochondria: <b>PGC1<math>\alpha</math></b> co-factors and targets: <b>Esrrg, Mef2c, Pparg, Cox6c, Nefh</b><br><b>Slit2, Slit3</b> : axon branching?                                                                     | <b>Unc5b</b> : wiring specificity?<br><b>Hs3st4</b> : cell surface coating?                                                        | <b>Hs6st3</b> : cell surface coating?                                        | <b>Grin3a</b> glycine R: tonic depolarization?                                                   | <b>Unc5a</b> : wiring specificity?<br><b>Chst1</b> : cell surface coating? | Myelination: <b>Ptn</b><br>NO synthesis, release<br><b>Unc5d</b> : wiring specificity?                                                     |

Blue font – previously reported; red font – current discovery

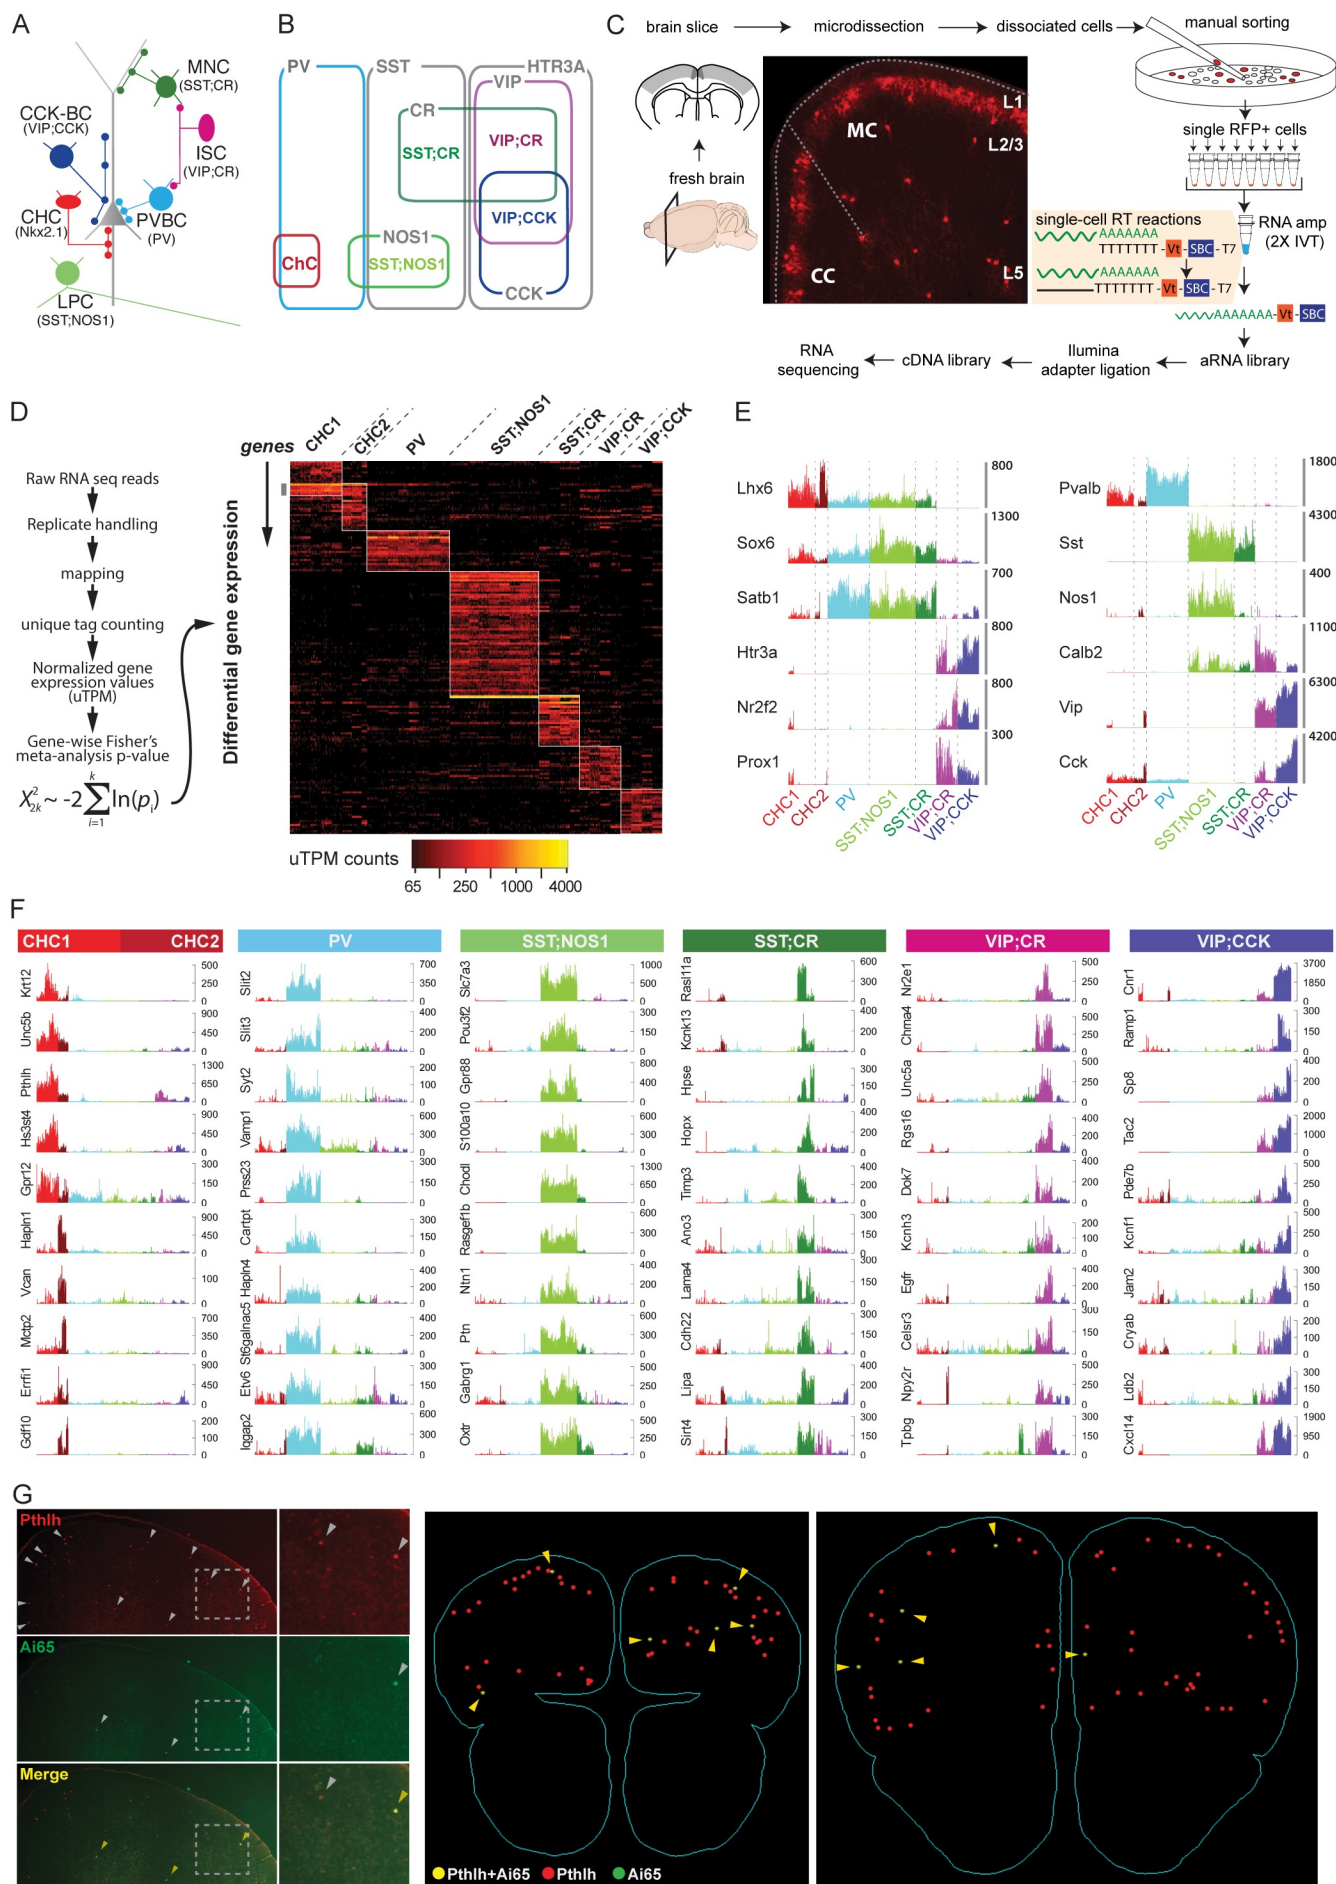

Figure 1

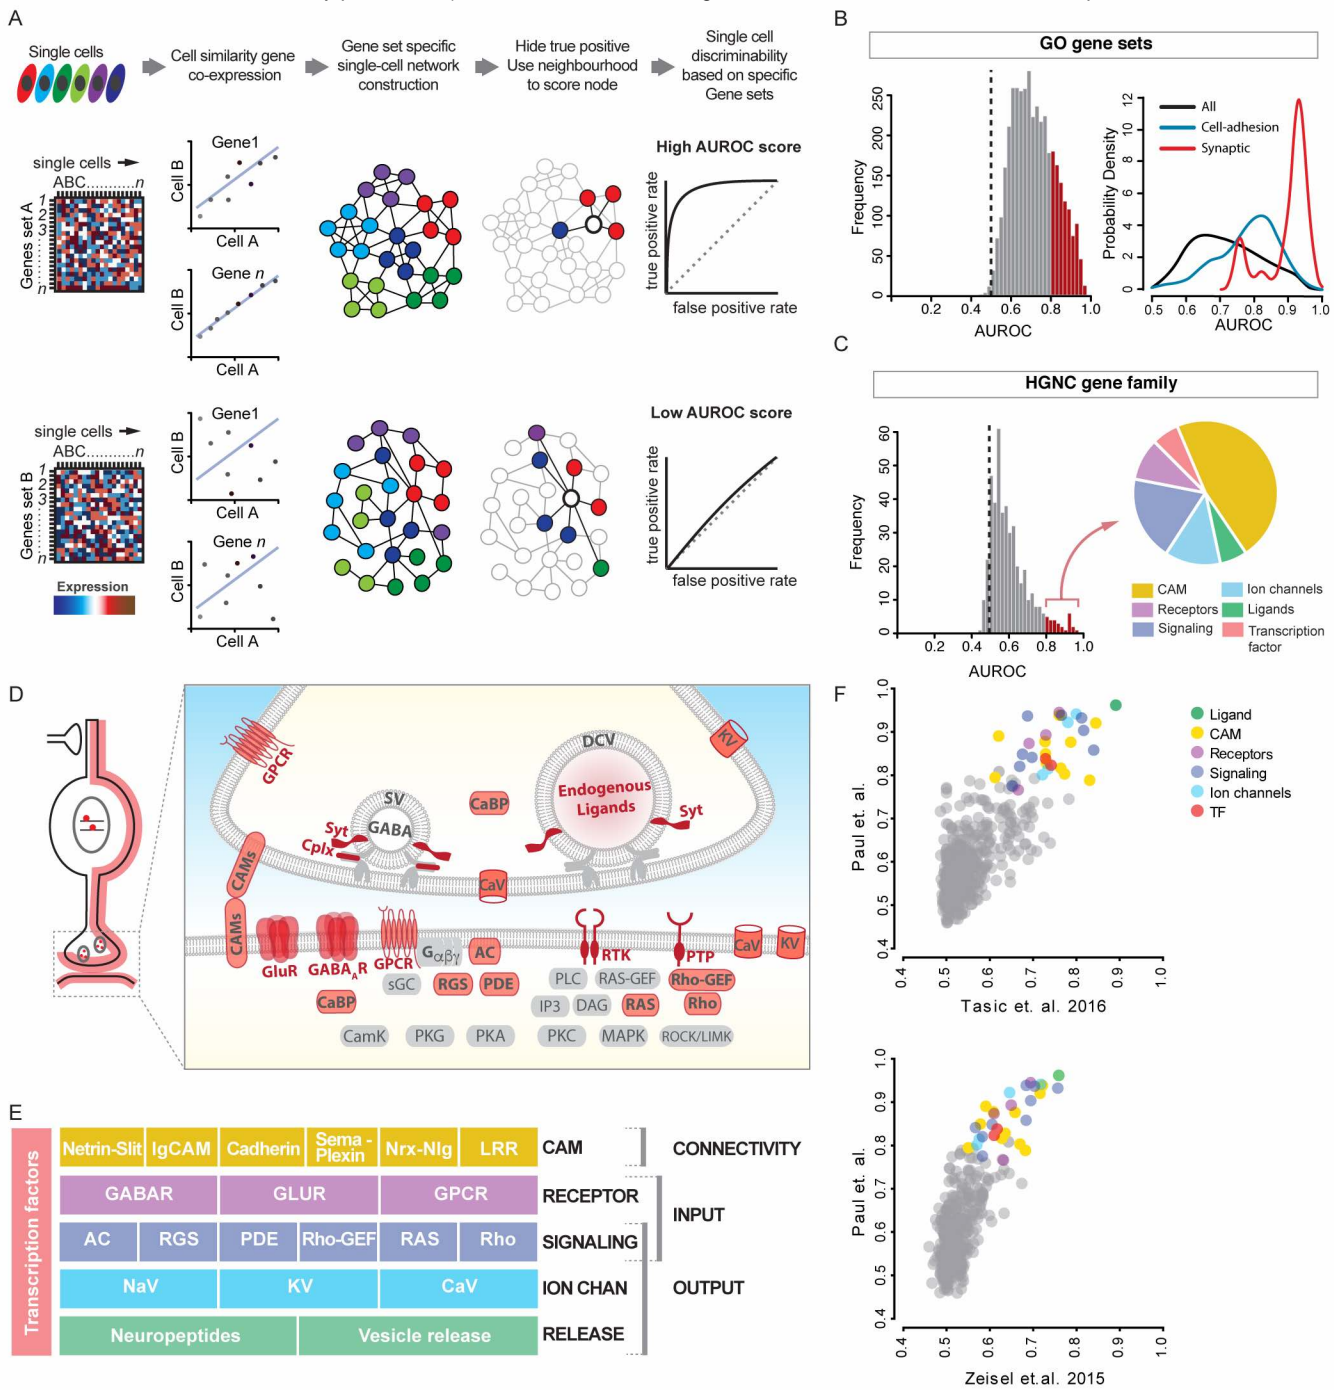

Figure 2

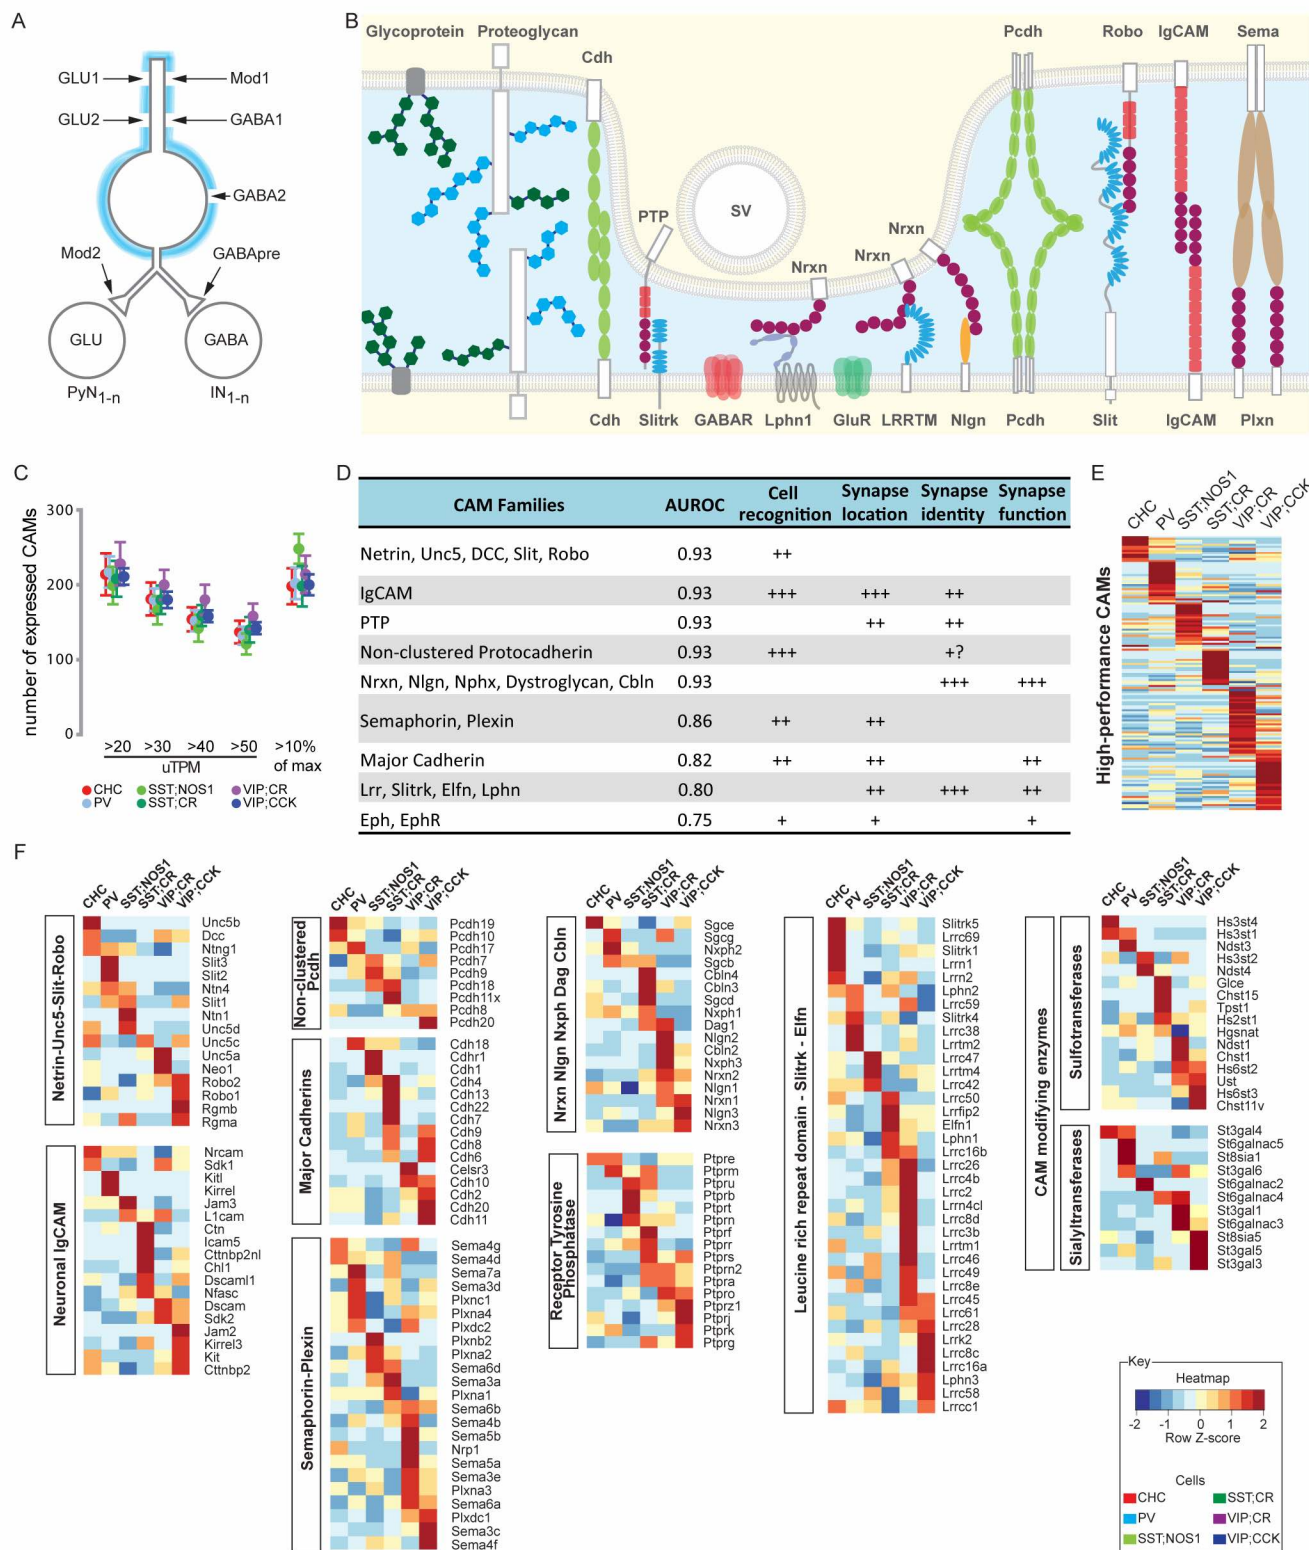

Figure 3

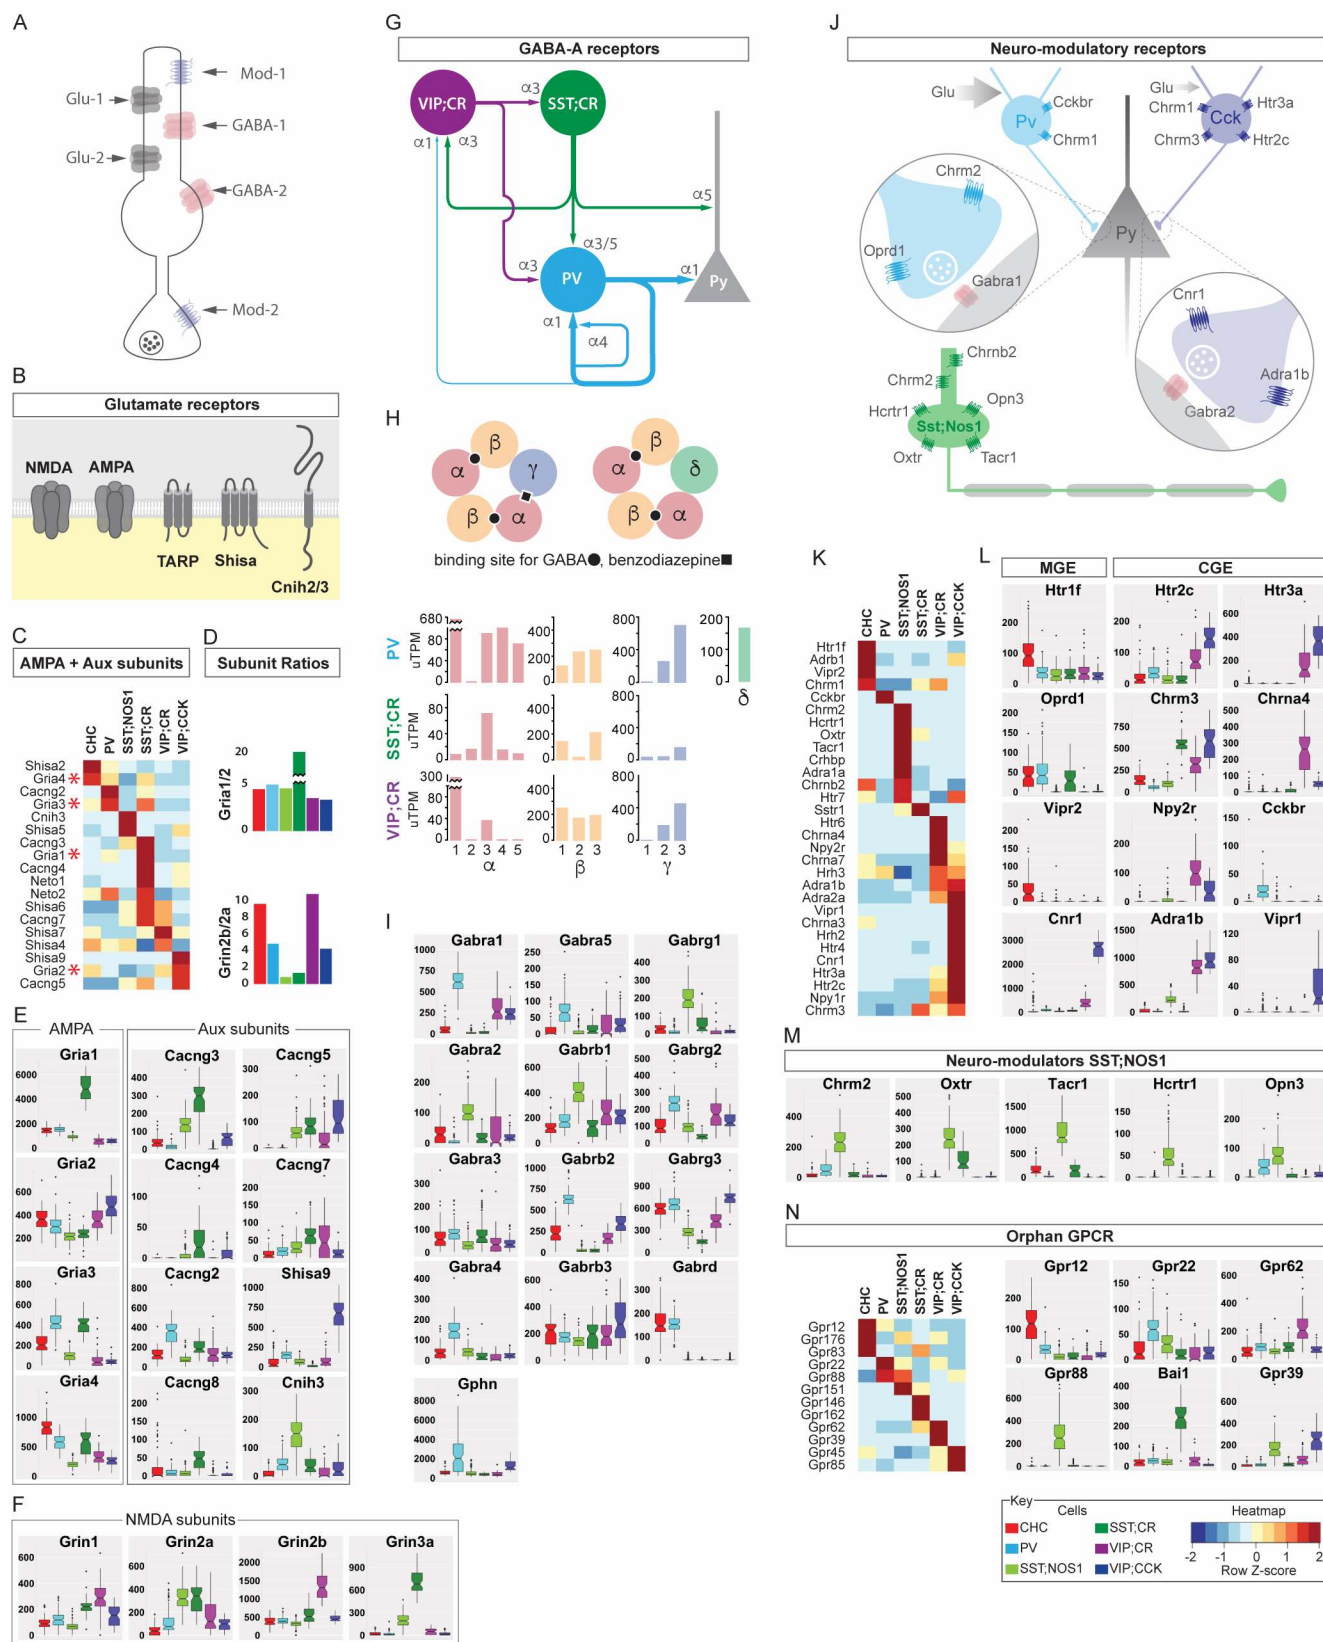

Figure 4

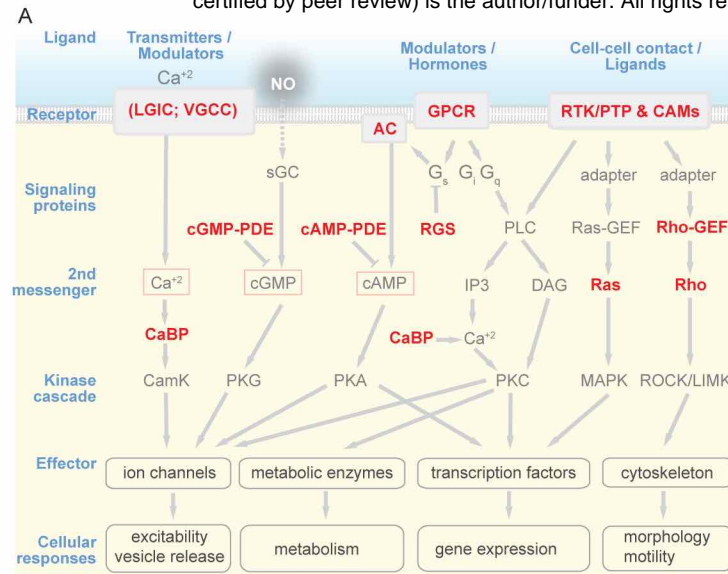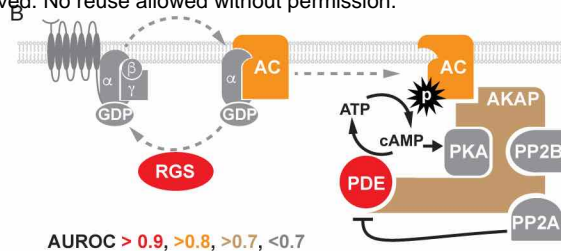

AUROC > 0.9, > 0.8, > 0.7, < 0.7

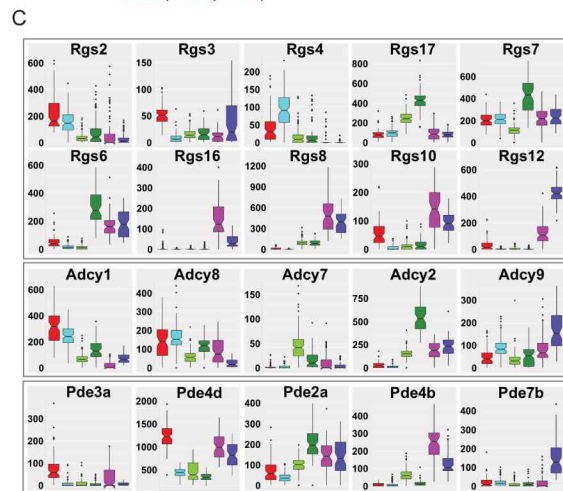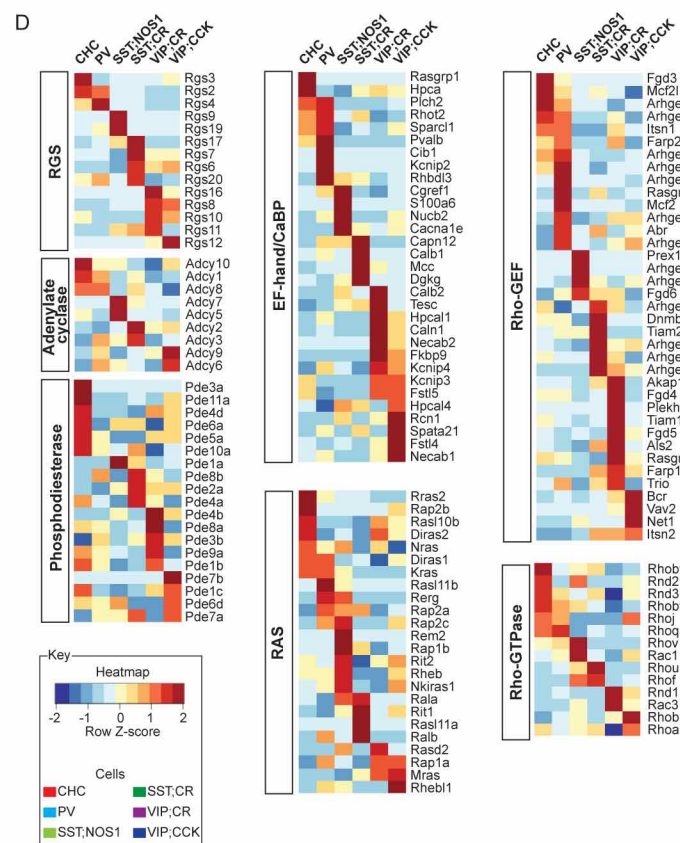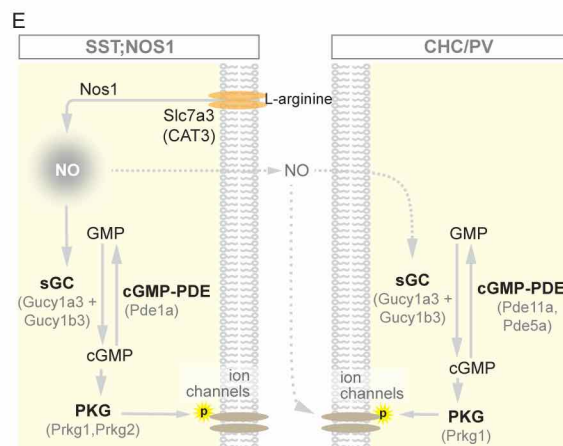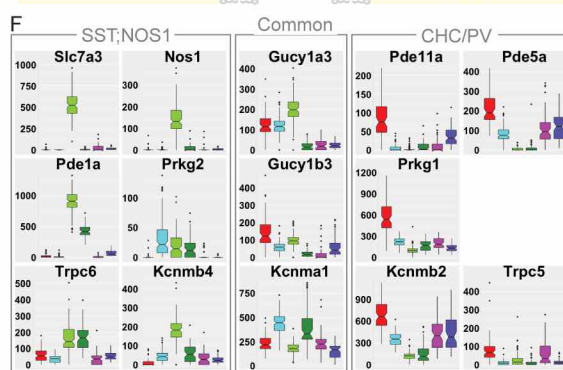

Figure 5



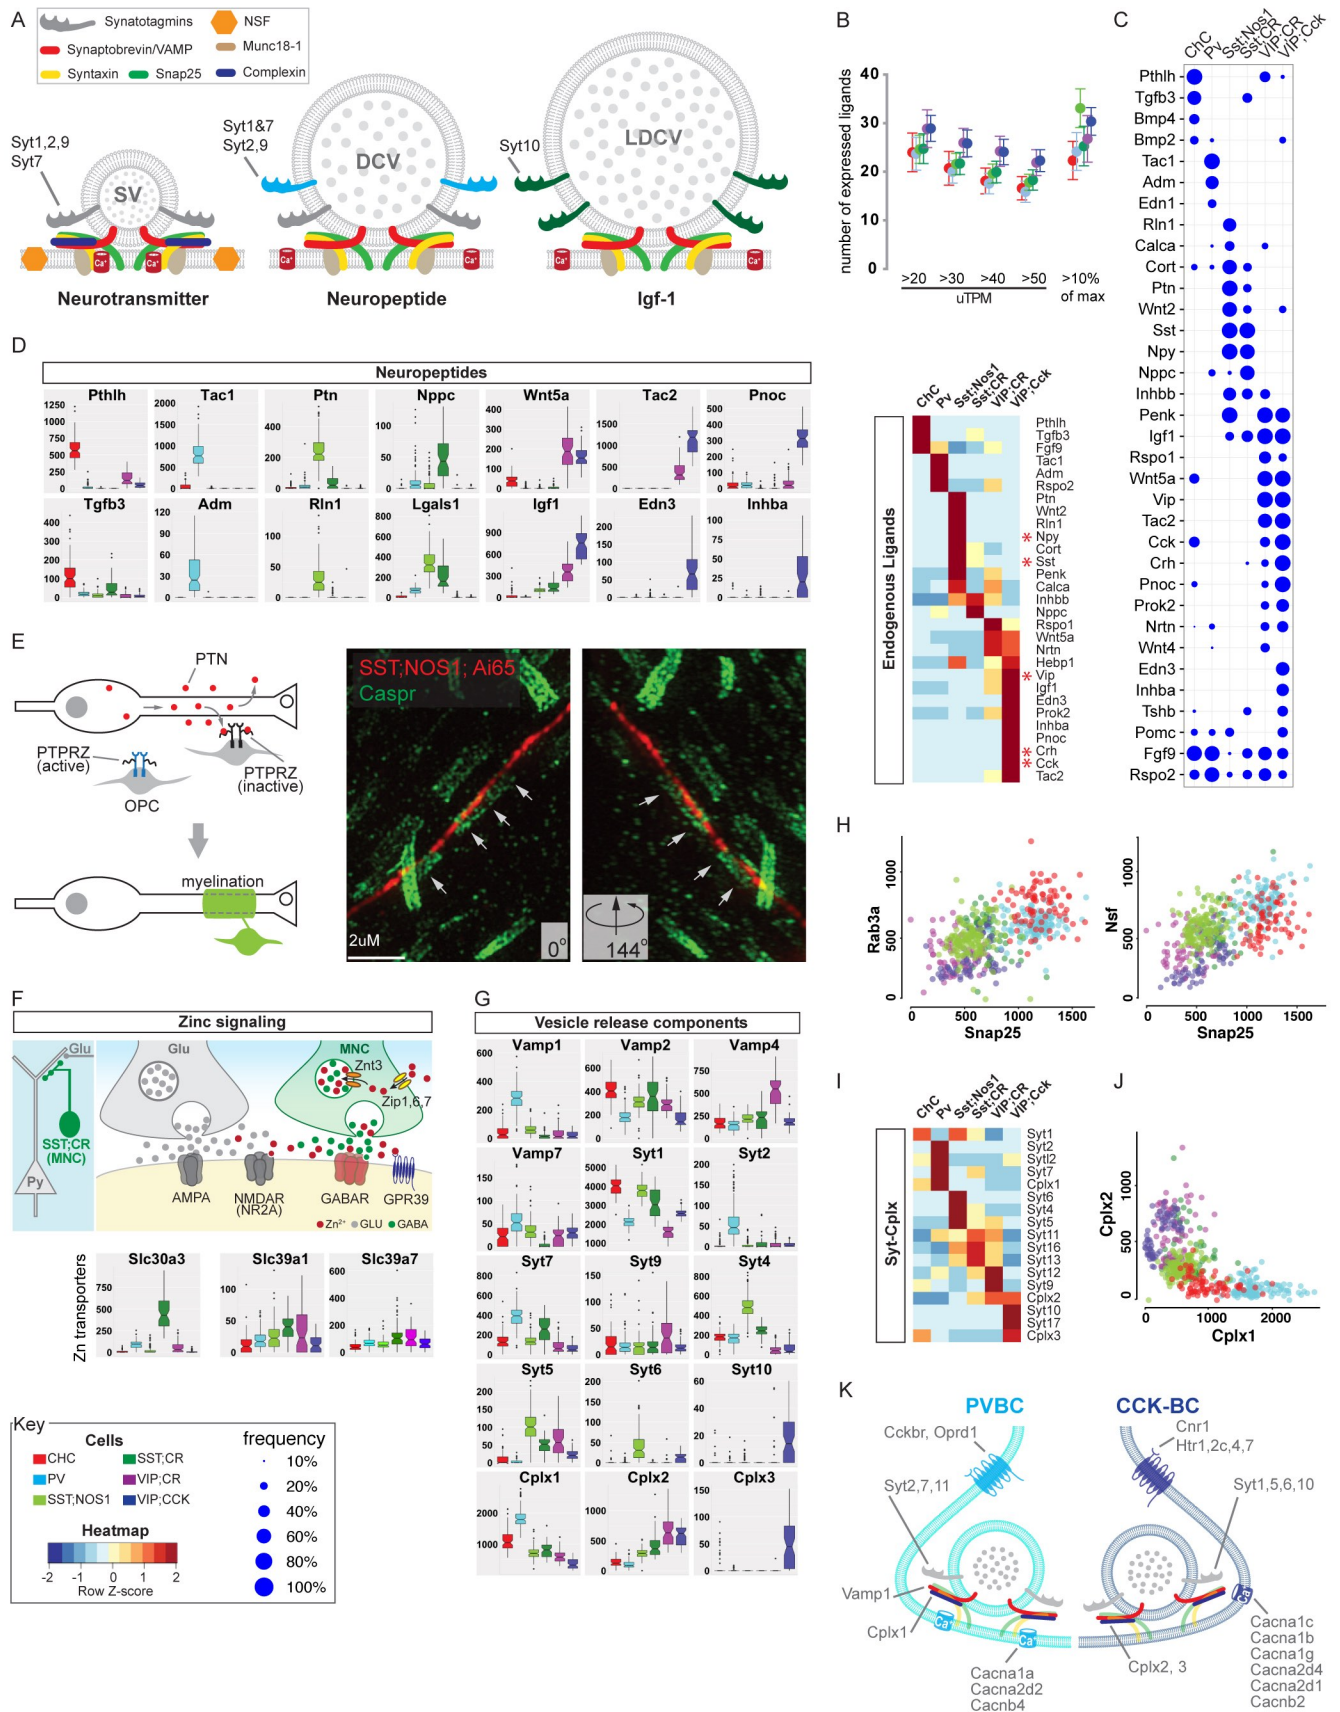

Figure 6

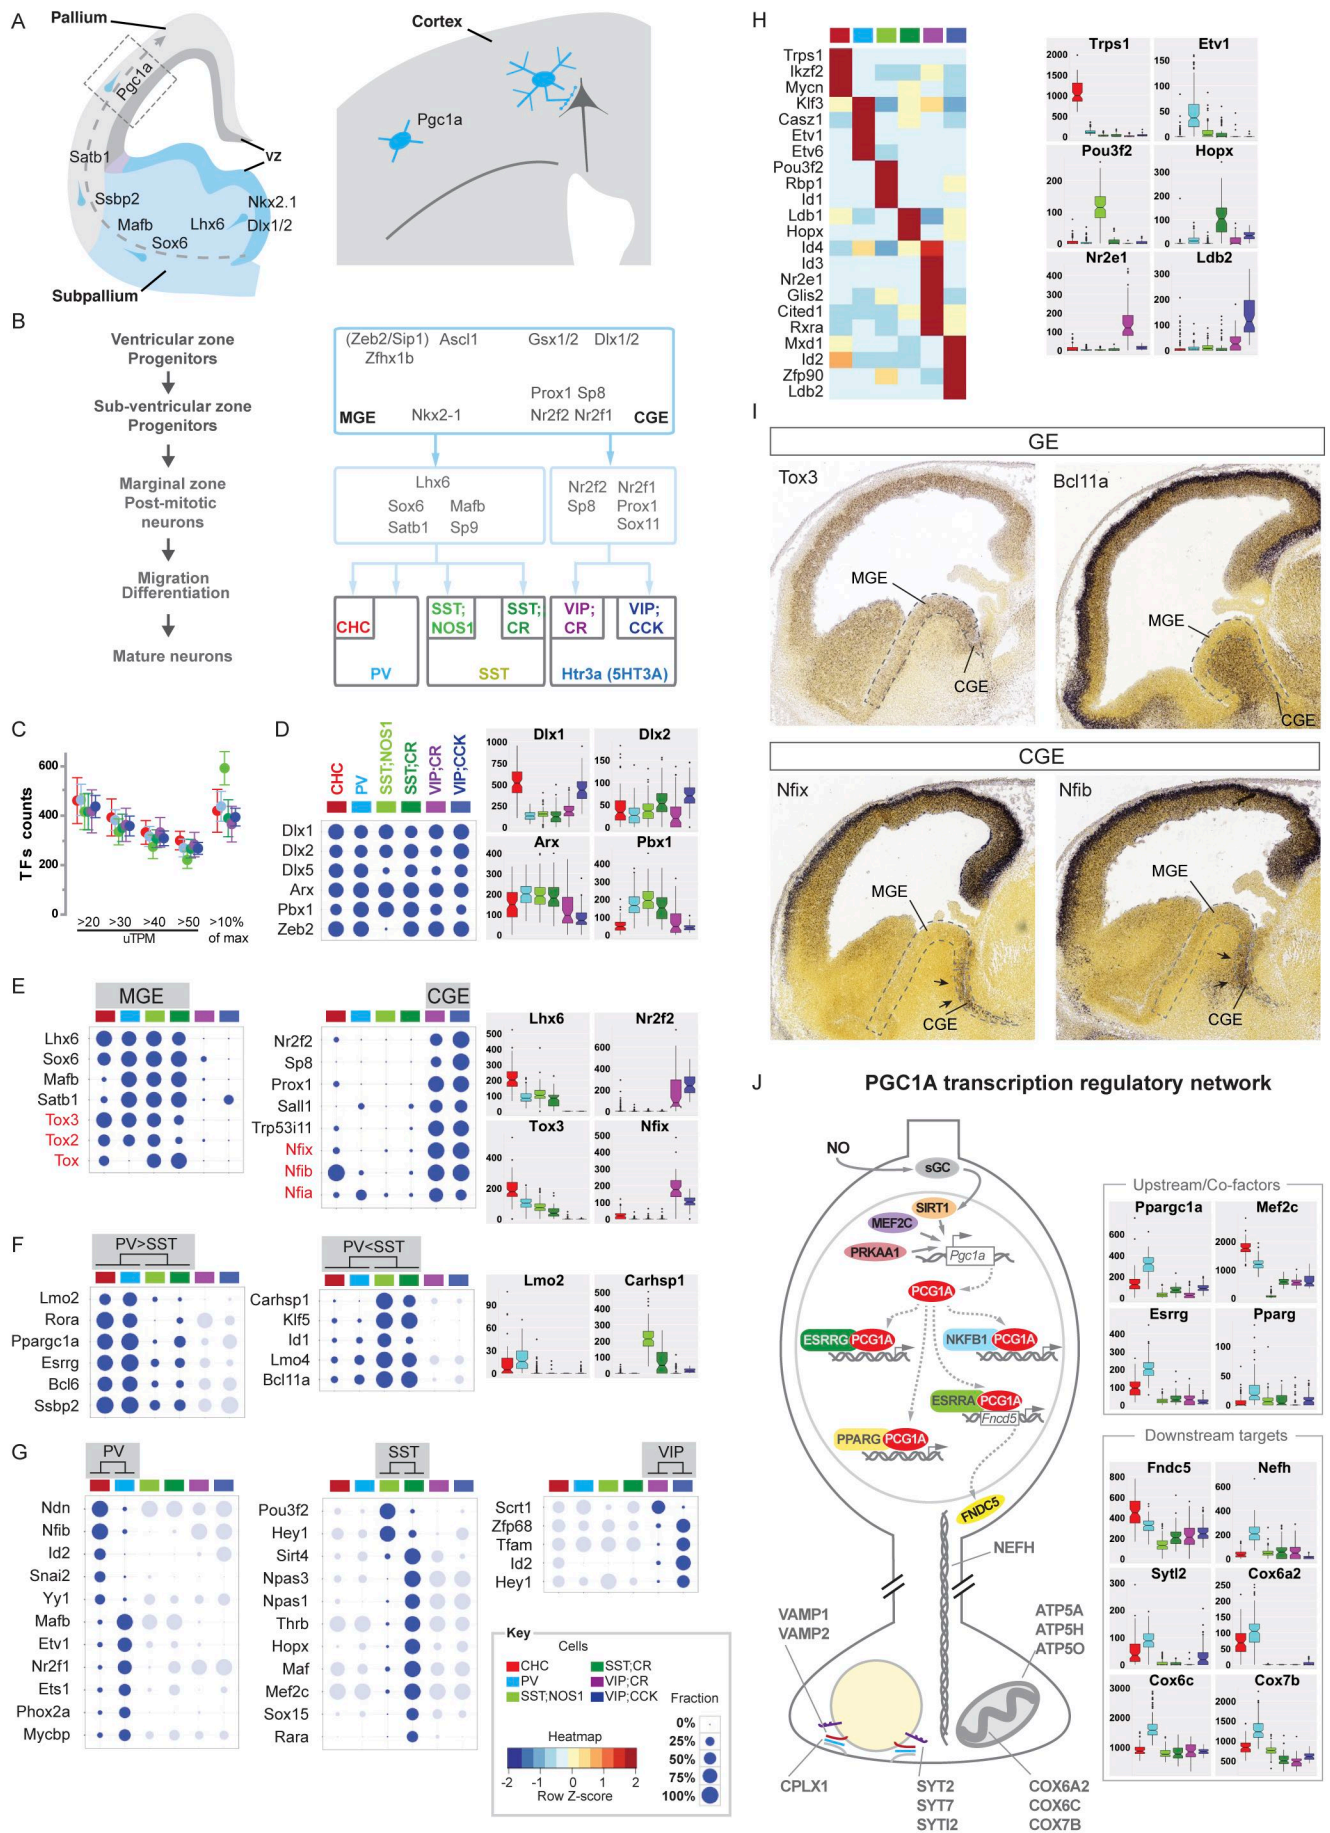

Figure 7

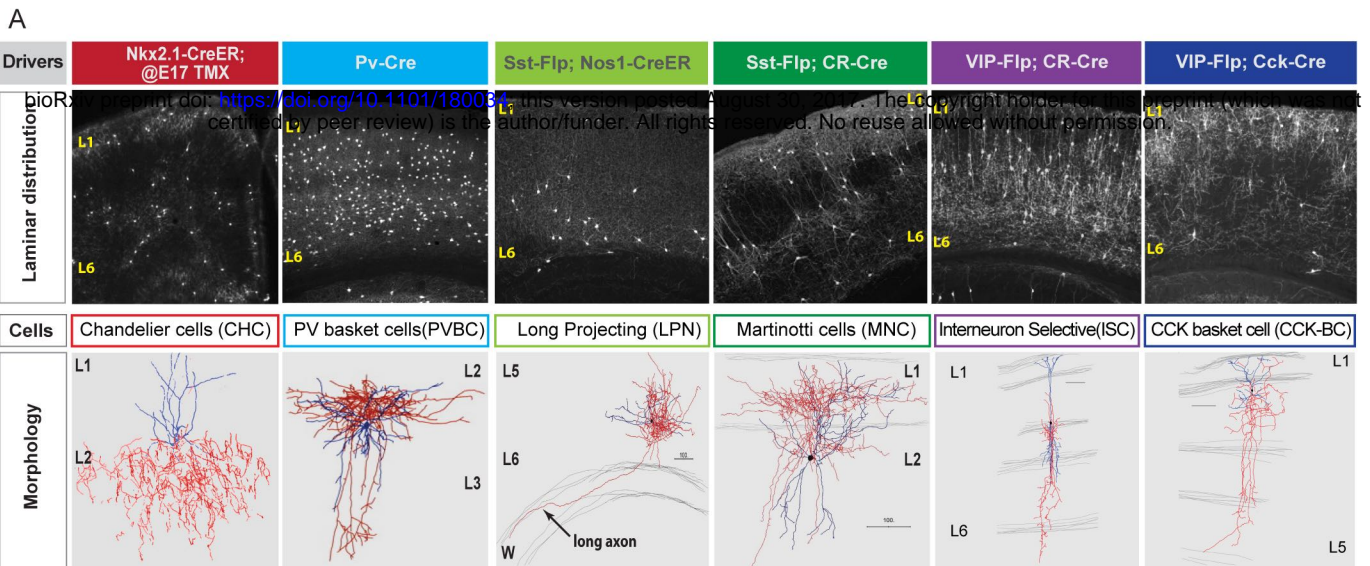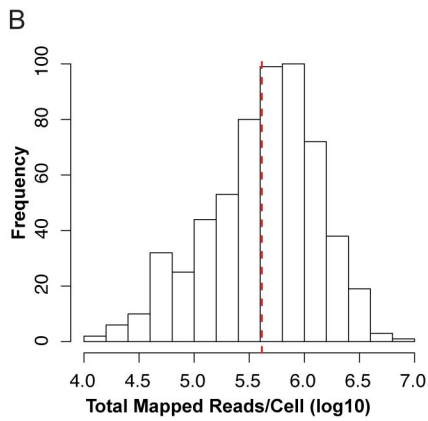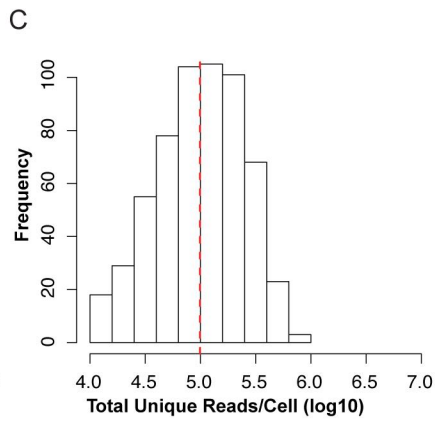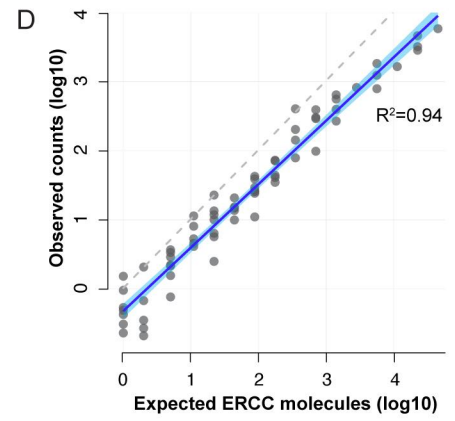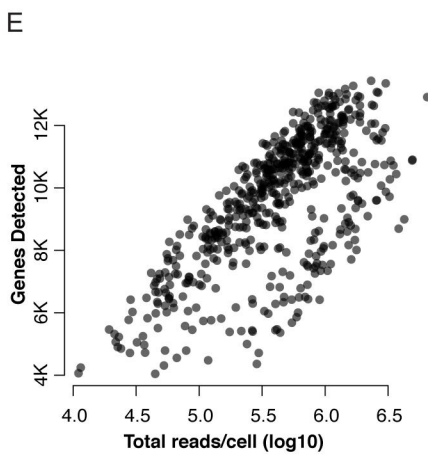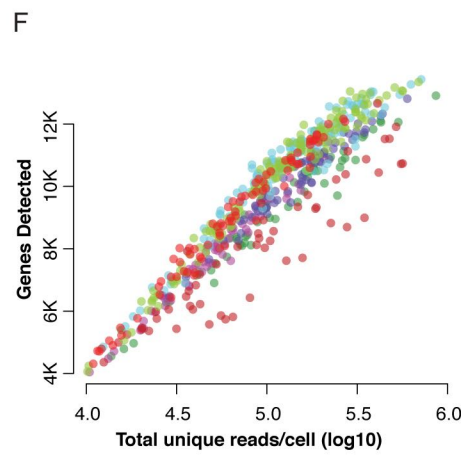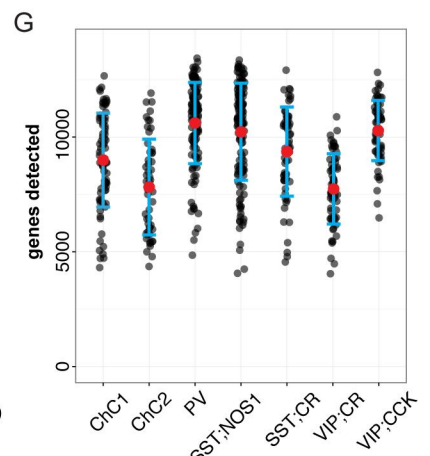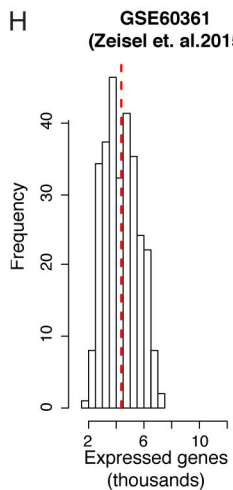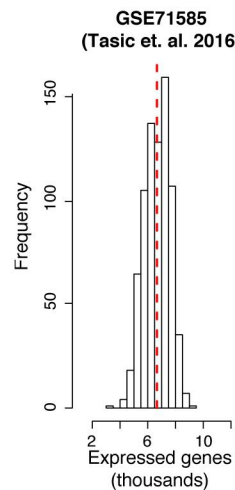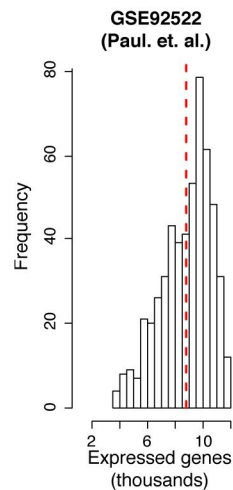

Supplementary Figure S1

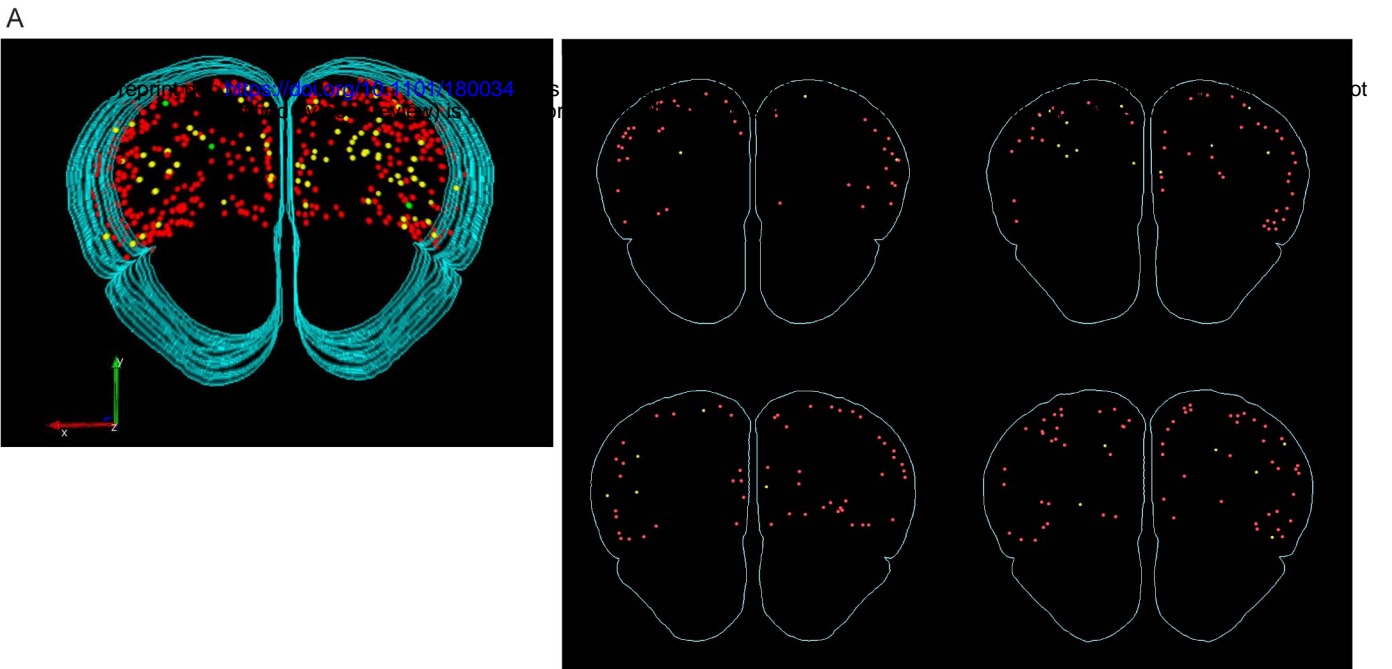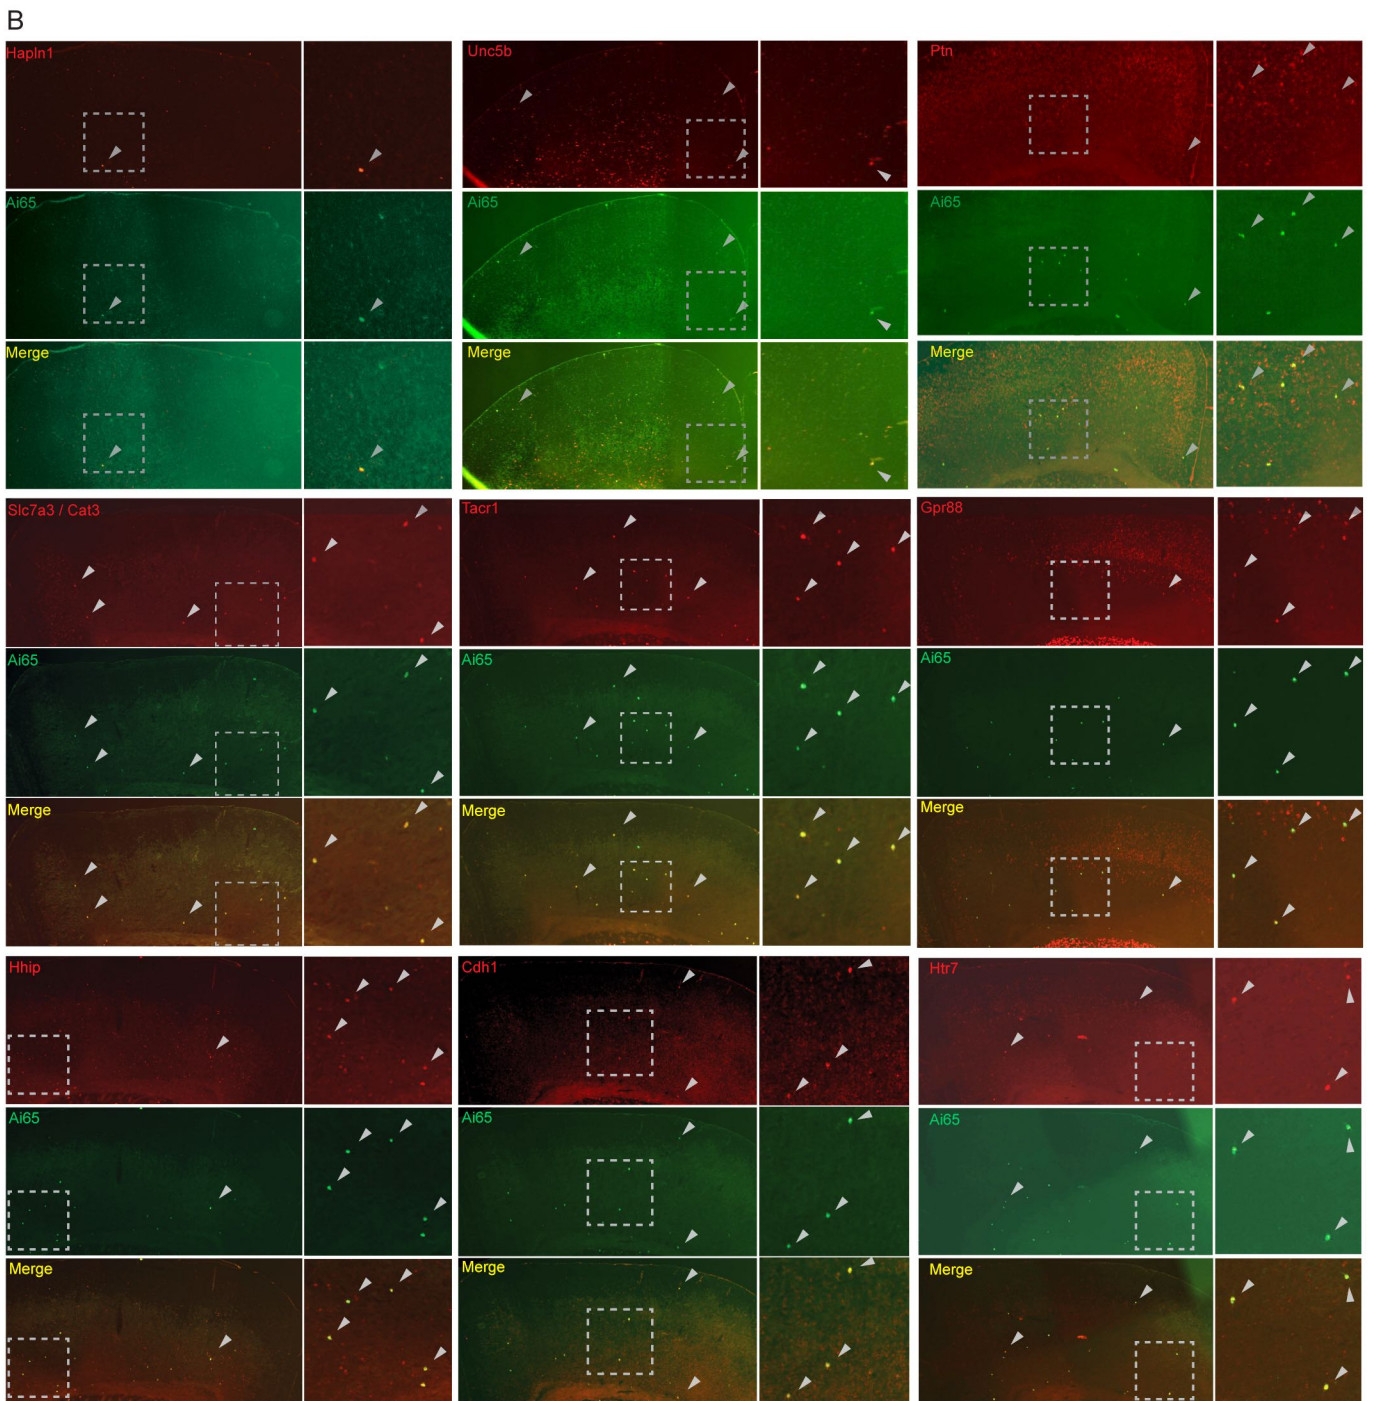

Supplementary Figure S2

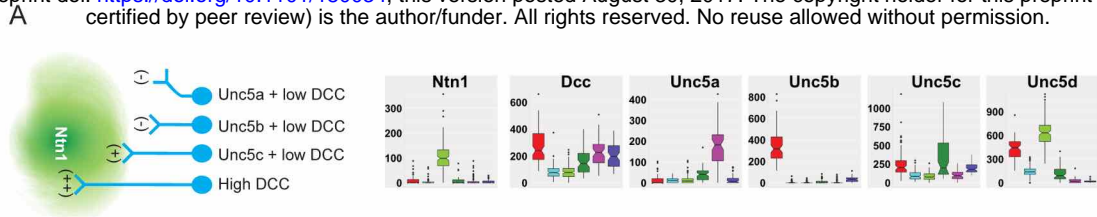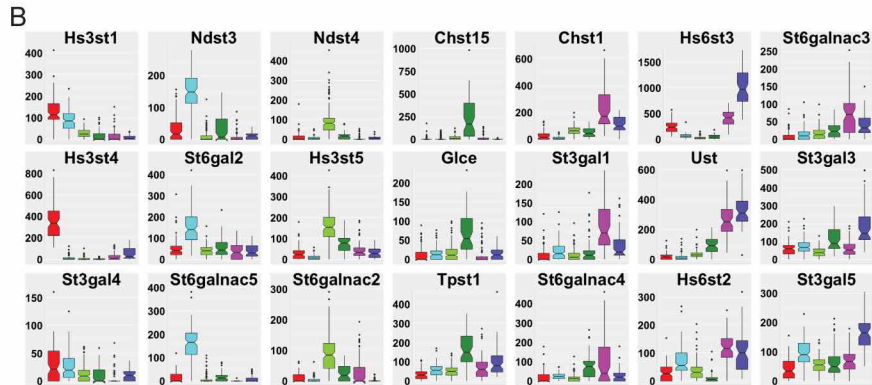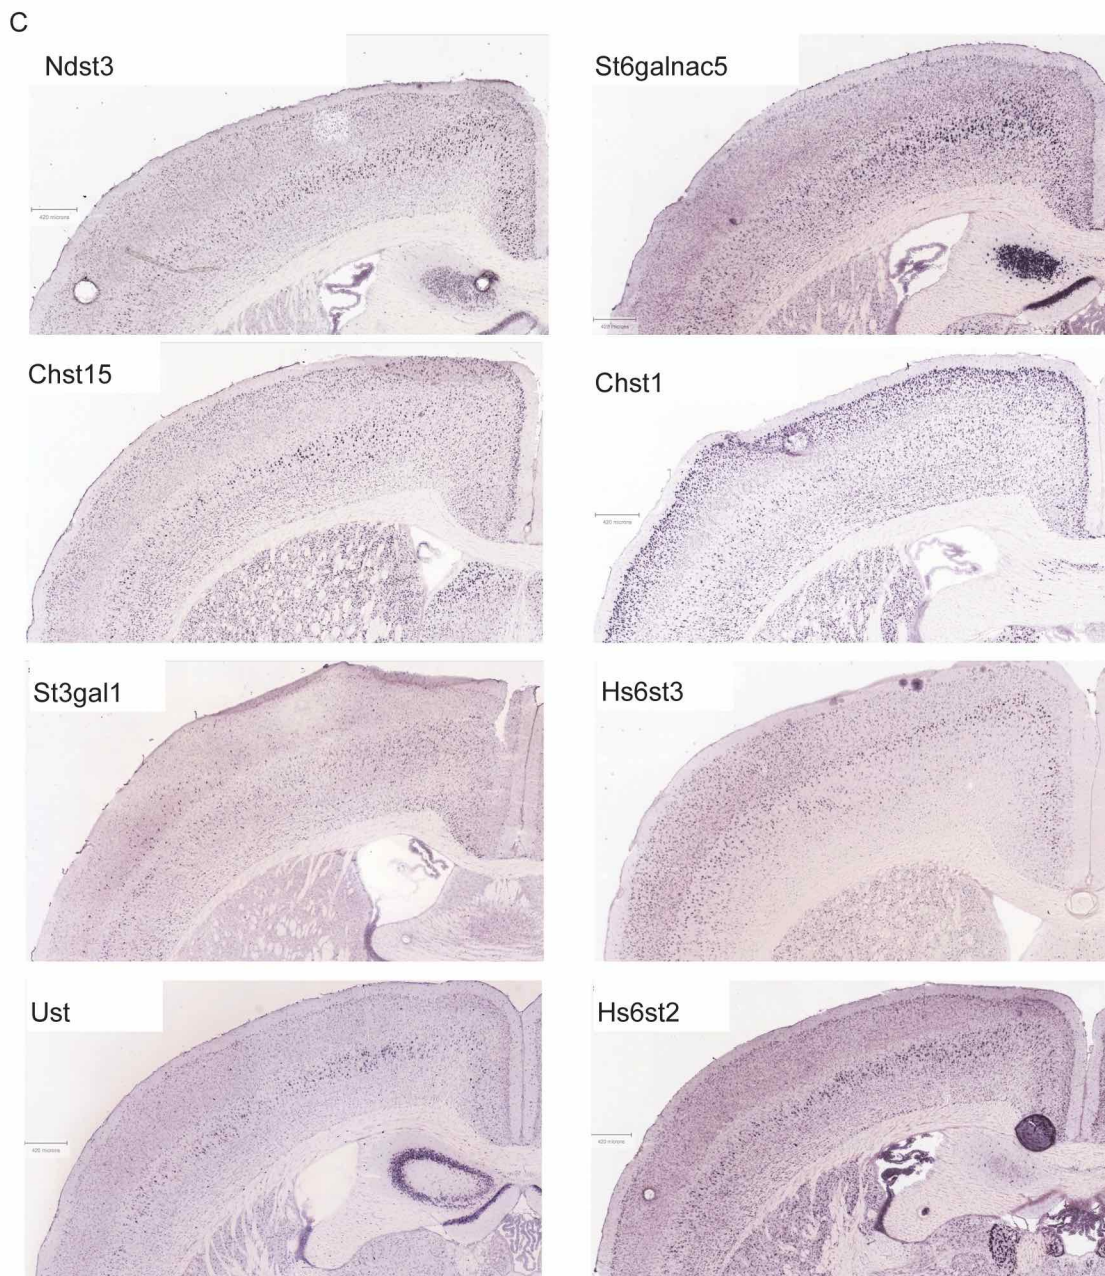

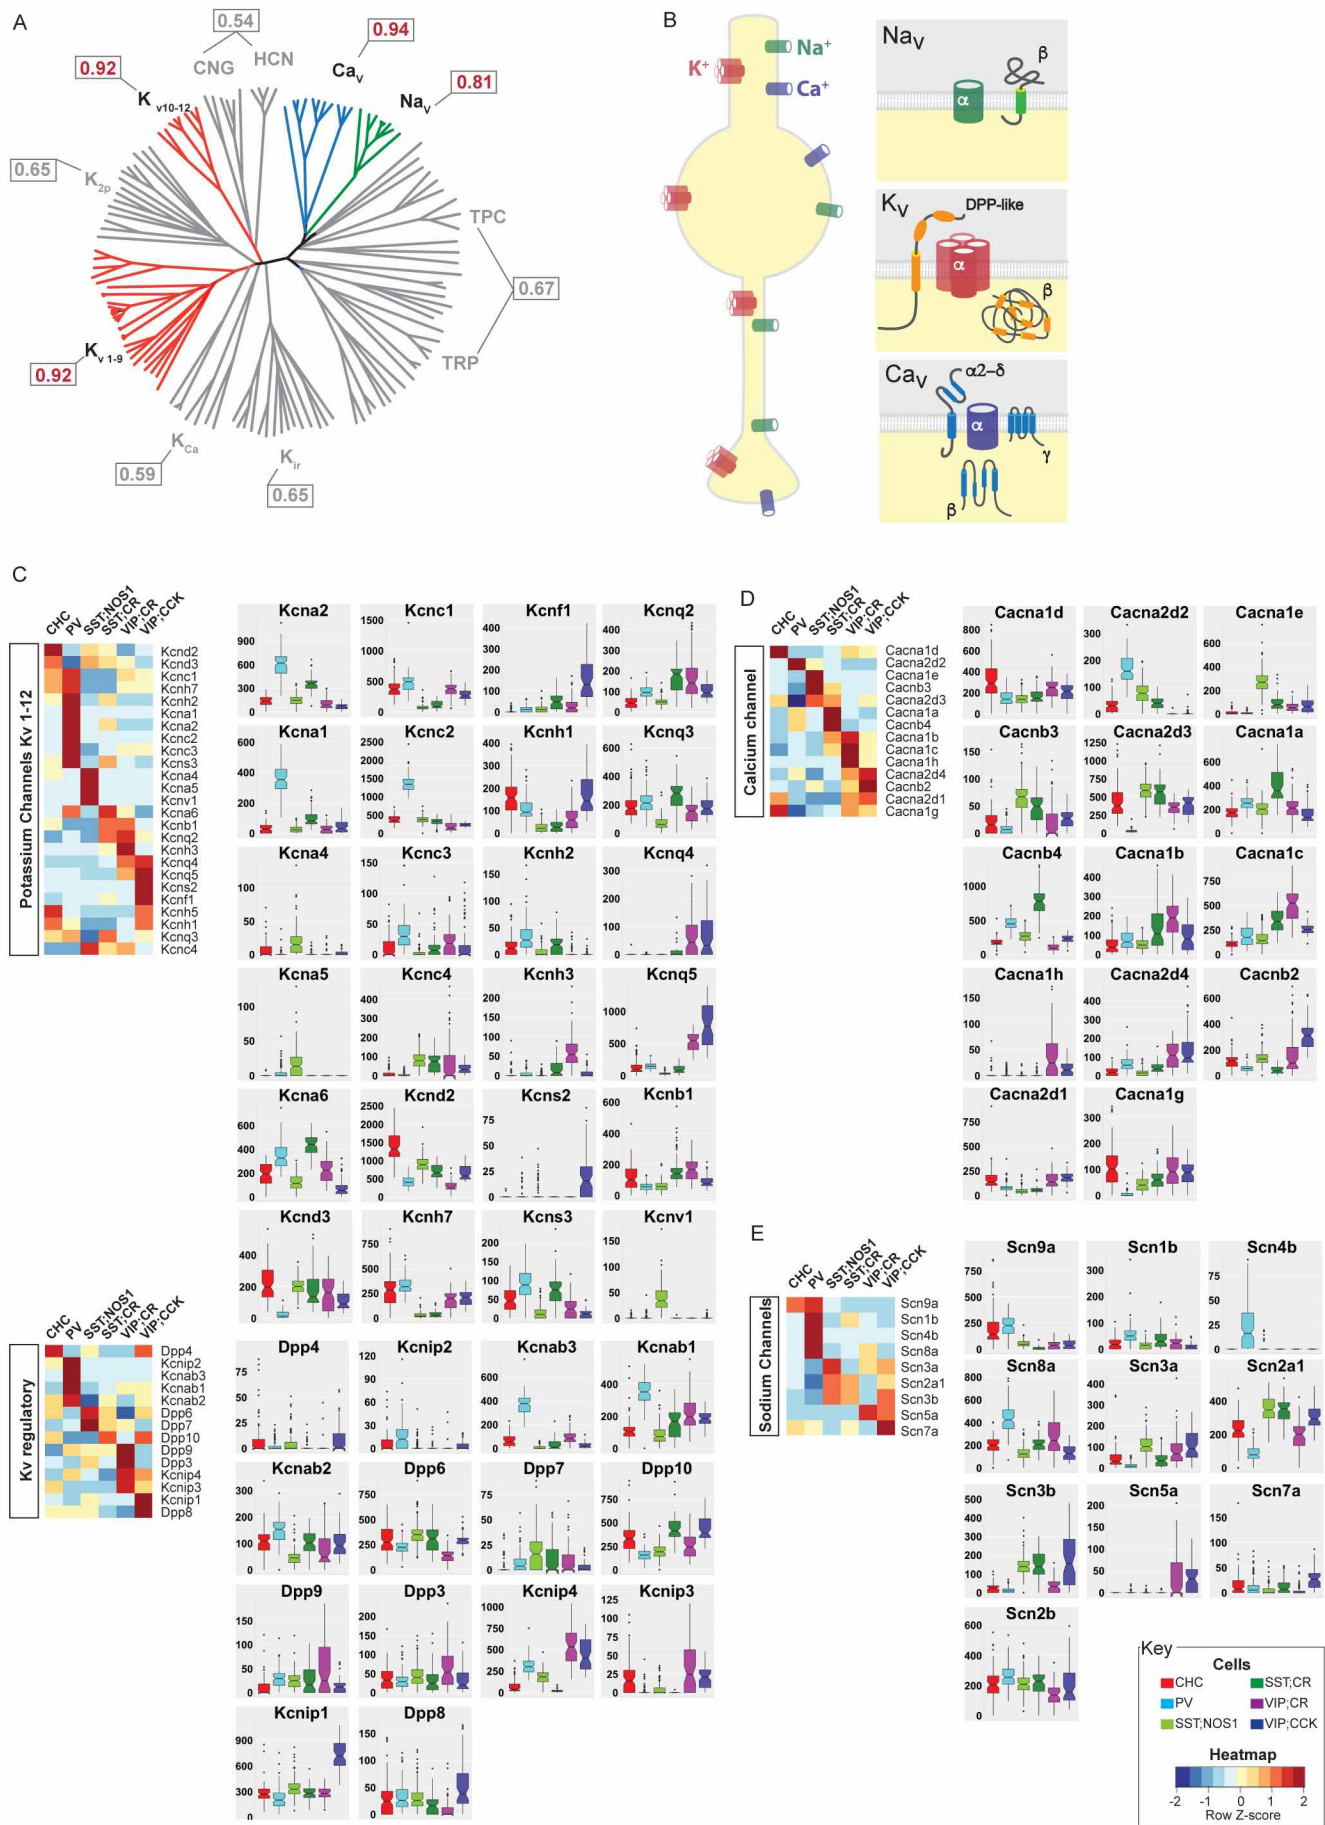

Supplementary Figure S4

A

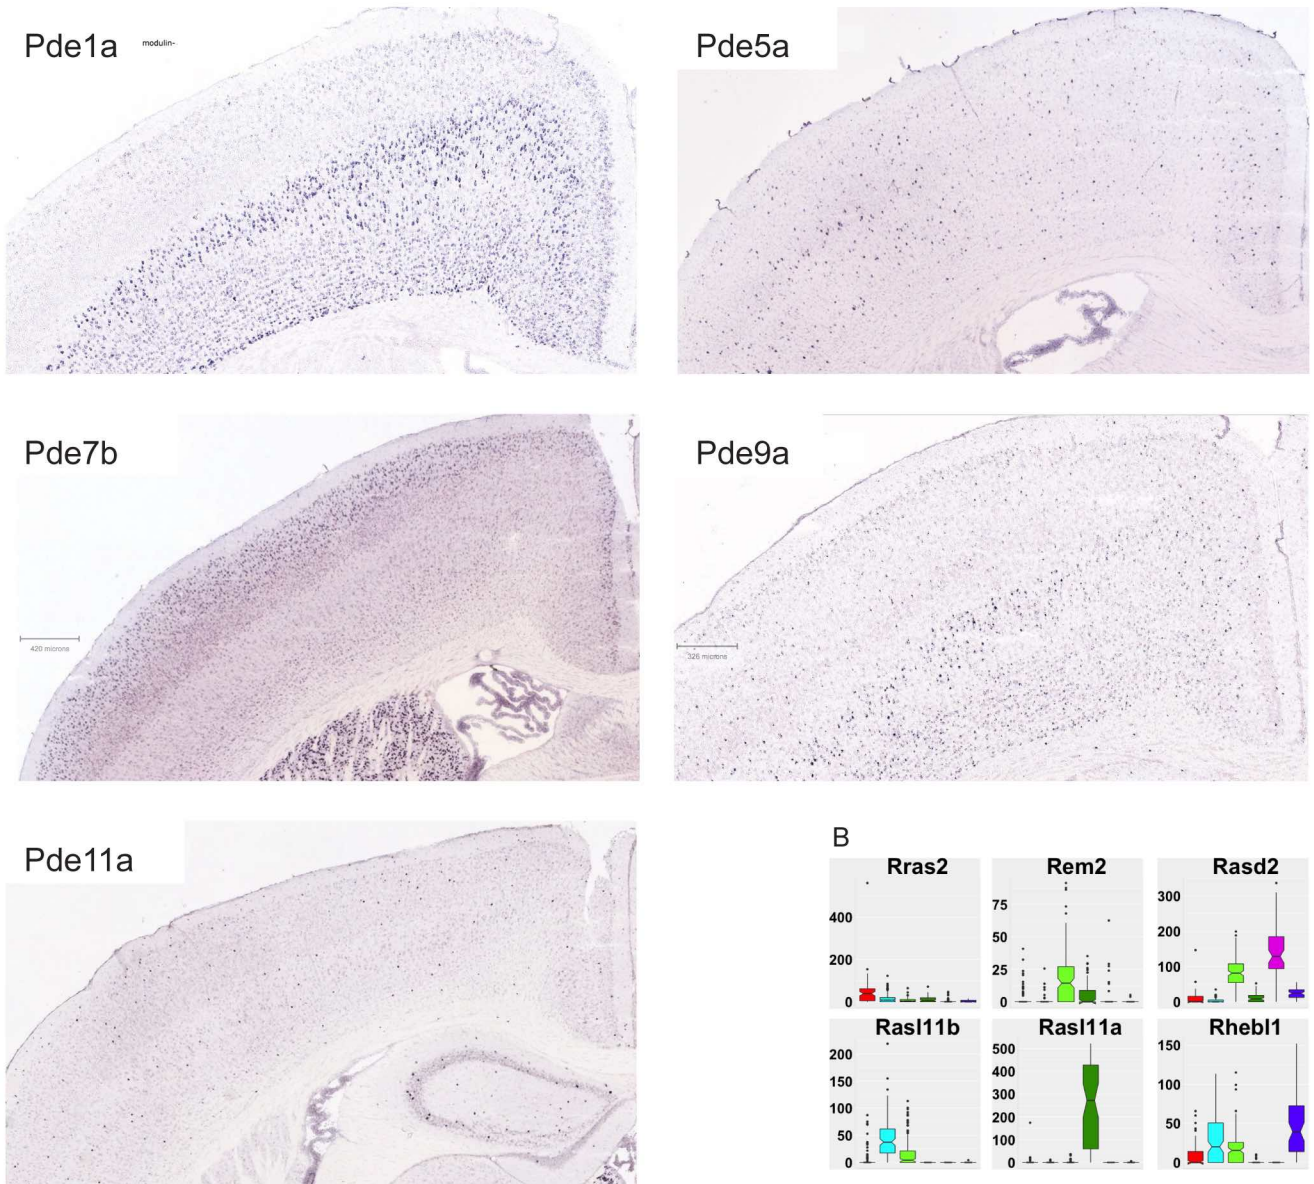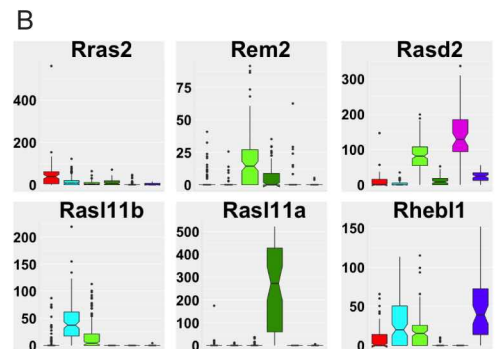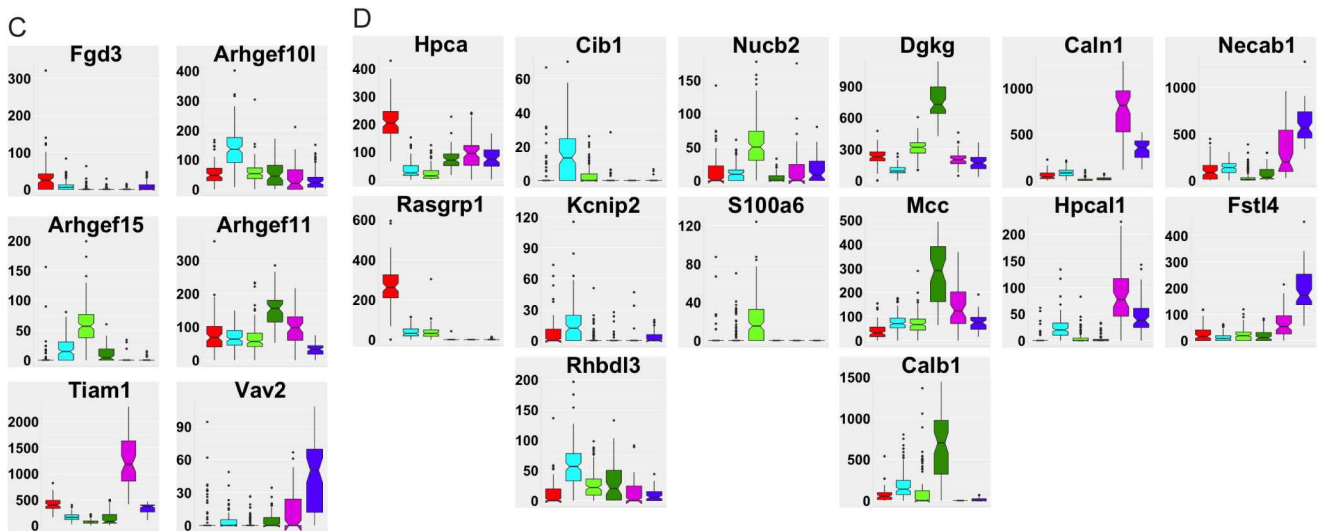

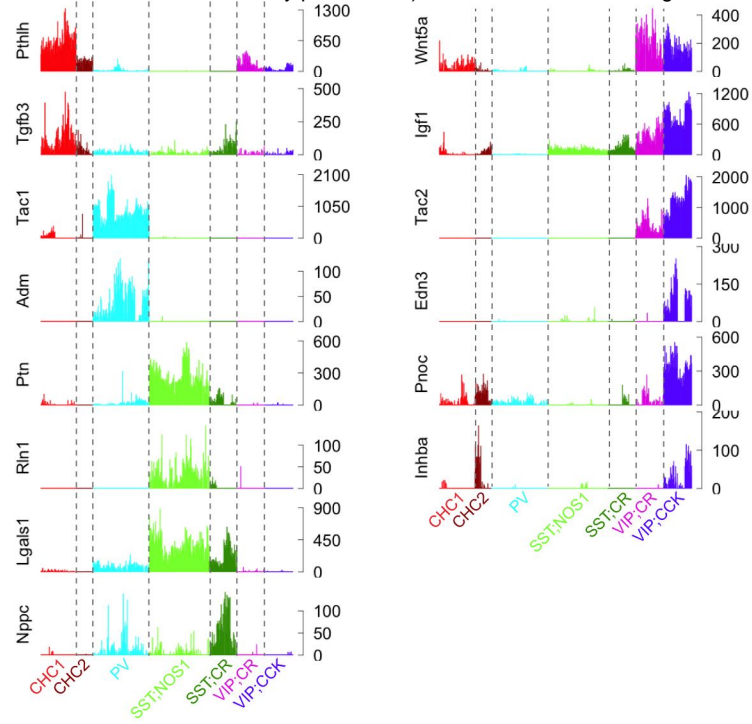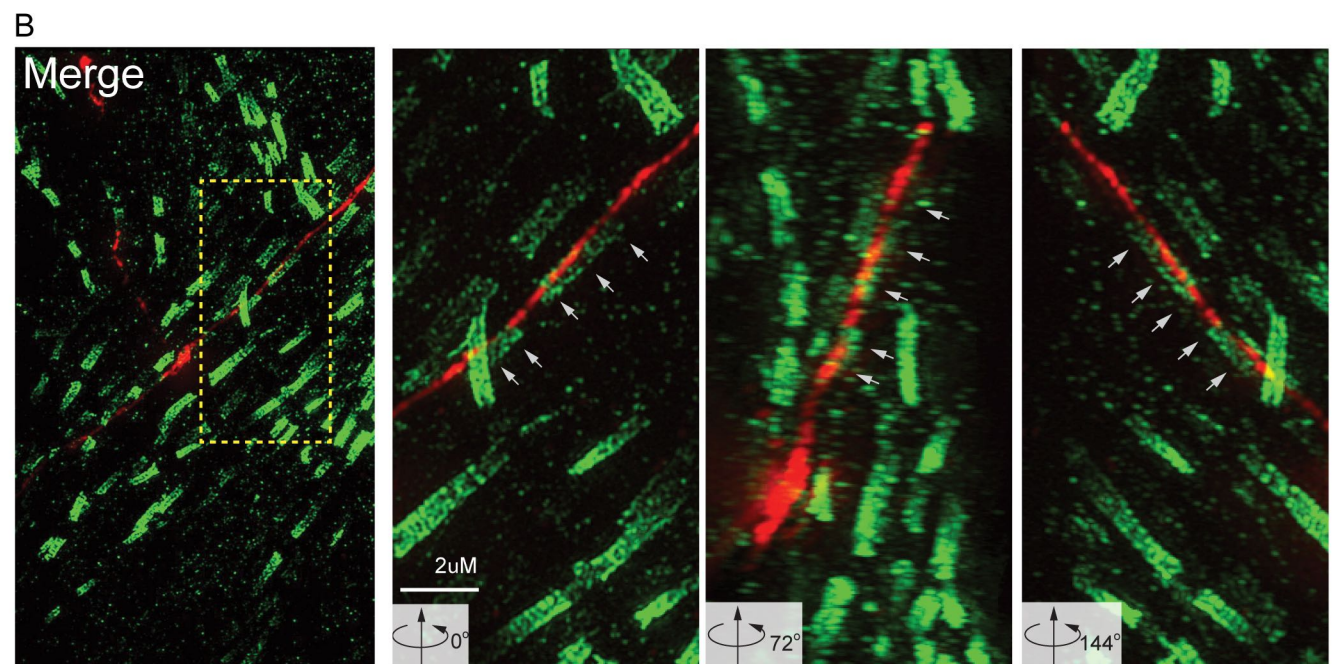



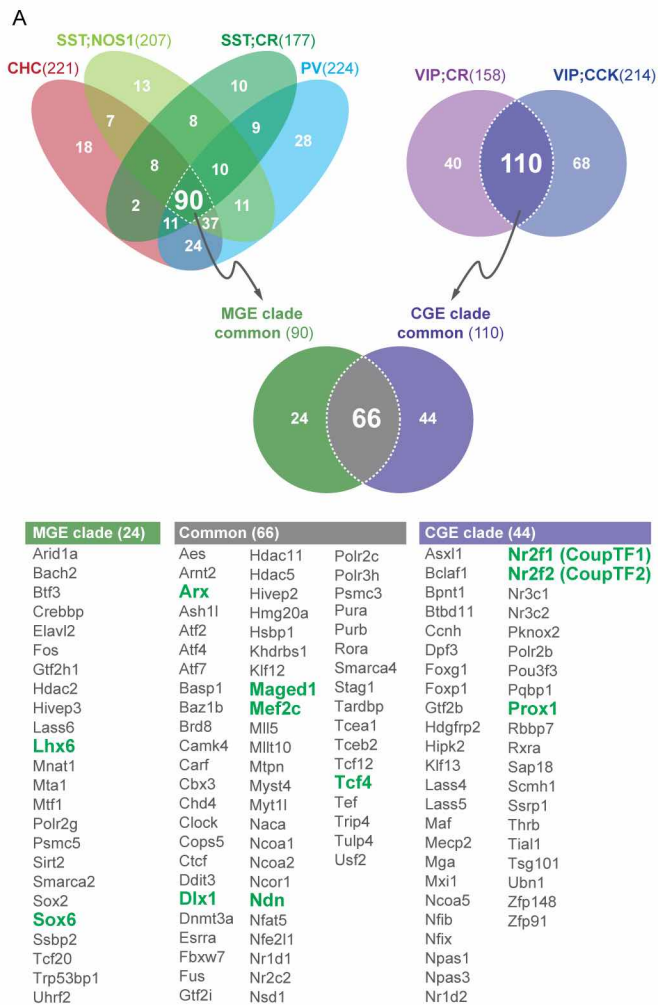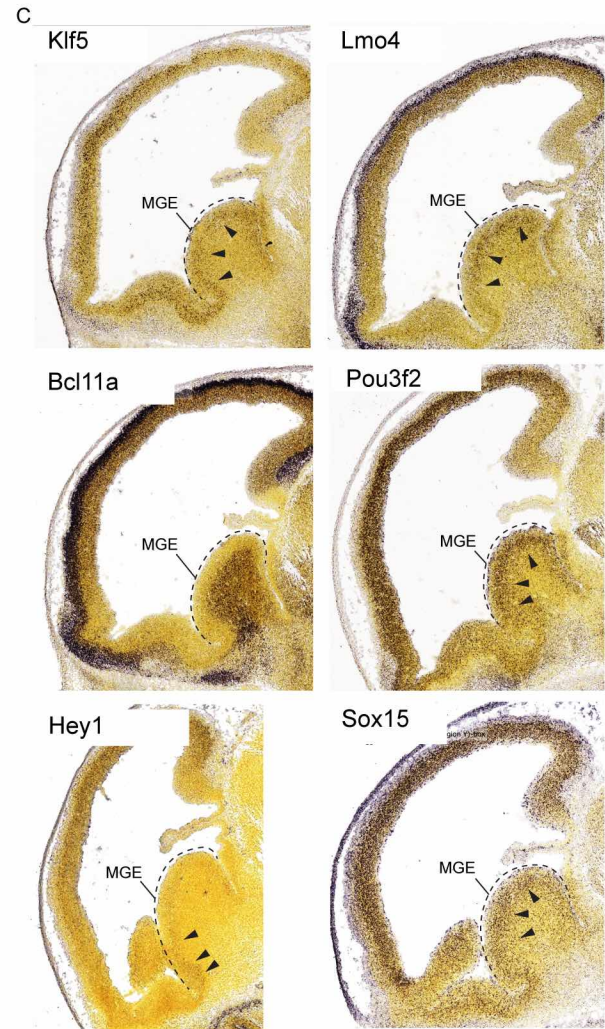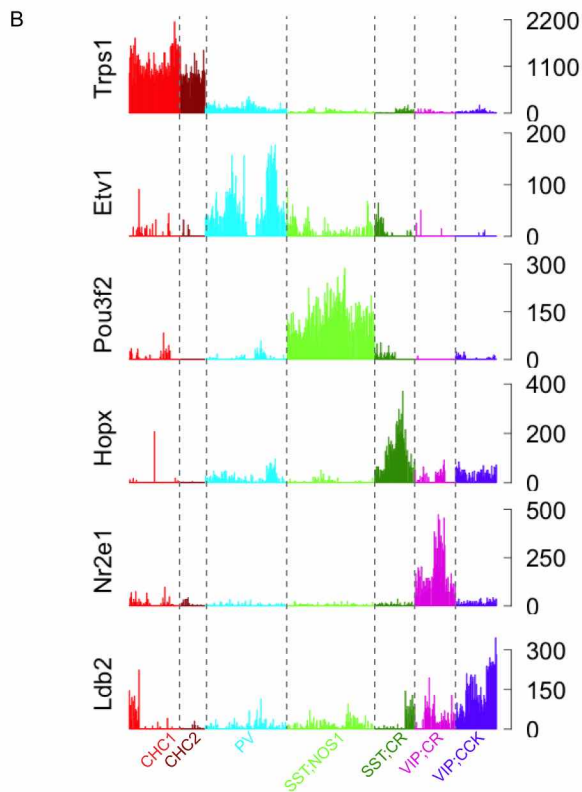

**D**

| Genes    | PV-bsk Enrichment |          | PGC1a targets<br>(Lucas et. al. 2014) |          |
|----------|-------------------|----------|---------------------------------------|----------|
|          | Folds             | p-value  | Folds                                 | p-value  |
| SYT2     | 11.55             | 1.75E-07 | 2.47                                  | 3.10E-04 |
| PVALB    | 10.12             | 1.75E-07 | 89.89                                 | 6.70E-05 |
| GRIN2C   | 9.13              | 1.47E-03 | 2.4                                   | 1.80E-04 |
| NEFH     | 4.78              | 1.75E-07 | 6.78                                  | 1.90E-04 |
| INPP5J   | 3.11              | 1.75E-07 | 3.62                                  | 1.20E-04 |
| SPARCL1  | 2.87              | 1.75E-07 | 8.37                                  | 3.70E-04 |
| ST8SIA1  | 2.64              | 1.75E-07 | 2.08                                  | 9.40E-04 |
| STAC2    | 2.55              | 1.75E-07 | 4.95                                  | 6.70E-05 |
| GAS6     | 2.48              | 1.75E-07 | 2.62                                  | 1.30E-04 |
| CPLX1    | 2.43              | 1.75E-07 | 14.89                                 | 5.40E-05 |
| COX7B    | 2.39              | 1.75E-07 | 4.51                                  | 2.80E-04 |
| PHYH     | 2.22              | 1.75E-07 | 2.23                                  | 3.30E-03 |
| COX6C    | 2.16              | 1.75E-07 | 2.27                                  | 1.90E-04 |
| PACSIN2  | 2.09              | 1.25E-05 | 3.87                                  | 1.70E-04 |
| UQCRRH   | 1.98              | 1.75E-07 | 2.31                                  | 2.10E-02 |
| PDHA1    | 1.97              | 1.75E-07 | 5.8                                   | 1.80E-04 |
| UQCRRFS1 | 1.84              | 1.09E-06 | 3.94                                  | 4.60E-04 |
| KCNK1    | 1.76              | 8.14E-05 | 4.9                                   | 7.80E-05 |
| IMPA1    | 1.73              | 1.47E-06 | 2.88                                  | 1.20E-04 |
| NCEH1    | 1.71              | 3.96E-07 | 4.84                                  | 2.60E-04 |
| ACSL6    | 1.70              | 2.00E-06 | 3.57                                  | 6.70E-05 |
| LIFR     | 1.68              | 1.43E-06 | 2.8                                   | 3.20E-04 |
| ATP50    | 1.31              | 5.93E-06 | 3.12                                  | 1.60E-04 |
| AK1      | 1.29              | 1.86E-05 | 3.93                                  | 8.90E-05 |
| ATP5A1   | 1.25              | 4.12E-07 | 2.09                                  | 1.10E-04 |
| NDUFS8   | 1.11              | 2.25E-02 | 2.77                                  | 4.80E-04 |
| ATP5H    | 1.10              | 7.39E-02 | 2.14                                  | 2.40E-04 |
| CDC42EP1 | 1.03              | 1.01E-01 | 2.53                                  | 1.20E-04 |
| SLC39A14 | 1.02              | 4.44E-02 | 2.33                                  | 1.30E-03 |
| ITGB1BP1 | 0.90              | 3.69E-01 | 4.32                                  | 2.50E-04 |
| ST8SIA5  | 0.79              | 1.67E-01 | 7.04                                  | 6.10E-05 |
| VAMP2    | 0.60              | 1.00E+00 | 2.23                                  | 7.40E-04 |

Supplementary Figure S7

## SUPPLEMENTAL TEXT

### 1. Differential expression of cell adhesion molecules and carbohydrate modifying enzymes among GTPs suggests large capacity for cell surface and extracellular matrix labels

#### 1a. Cell adhesion molecules

Among IgCAMs, Kitl, Kirrel, JAM2, 3, ICAM5 are each highly enriched in a specific subpopulation (Figure 3F). Other differentially expressed cell adhesion systems include: non-clustered protocadherins, major cadherins, receptor protein tyrosine phosphatases, semaphorin-plexin group (Figure 3F).

#### 1b. Carbohydrate modifying enzymes that diversify proteoglycans and glycoproteins

In addition to adhesion proteins serving as membrane labels, cell surface is extensively decorated by a large variety of carbohydrates presented by glycoproteins (many are glycosylated CAMs) and especially by proteoglycans along the membrane extending into the extracellular matrix. Among major groups of proteoglycans, heparan sulfate proteoglycans cooperate with CAMs to mediate cell-cell and cell-matrix interactions (Lee and Chien, 2004; Smith et al., 2015). On the other hand, chondroitin sulfate proteoglycans inhibit neurite growth and plasticity and form lattice like perineuronal nets (PNN) around subsets of neurons, including cortical PV basket cells (Miyata and Kitagawa, 2016a). The progressive postnatal formation of PNNs promotes the functional maturation of PV cells and regulates the critical period of neural plasticity in visual cortex (Pizzorusso et al., 2002). Interestingly, different neuron types may be surrounded by chondroitin sulfates of different structures that accumulate different proteins type (Matthews et al., 2002). It is unknown whether different GABAergic neurons generate unique blend of extracellular matrix such as distinct carbohydrate coats (i.e. a sugar code).

Proteoglycans consist of long polysaccharide chains covalently linked to one of a small number of core proteins (Miyata and Kitagawa, 2016b; Sarrazin et al., 2011). The extremely large molecular diversity of proteoglycans derives from the modification patterns, especially sulfation patterns, of sugar residues along the carbohydrate chain and at specific positions. These modifications are carried out by a large family of sulfotransferases in the Golgi apparatus, each catalyzes sulfation at specific carbon position of the sugar residue ring. Thus it is possible that a cell might express a particular combination of sulfotransferases to produce specific sulfation patterns for its proteoglycan repertoire (Lee and Chien, 2004). Indeed, developmental changes in the expression of two different sulfotransferases in PV interneurons alter the ratio of 4-sulfation/6-sulfation ratio of CSPG and regulate the maturation of PNN and PV function (Miyata et al., 2012). In addition to sulfation, glycoproteins can also be coated by sialic acid onto their carbohydrate chains, catalyzed by a family of sialyltransferases (Schnaar et al., 2014). However, the cellular expression of sulfotransferase repertoire is largely unknown. We discovered that both the sulfotransferase and sialyltransferase families are differentially expressed among GTPs, with high AUROC scores (0.88 and 0.85, respectively). Strikingly, six sulfotransferase are highly specific to different GTPs (Figure S3B): Hs3st4 to ChC, Chst15 to SST/CR, Chst1 to VIP/CR, Hs3st5 to SST/NOS; Hs3st1 is enriched in ChC and PV cells and Hs6st3 is enriched in VIP/CCK cells. Differential combinations of these carbohydrate modifying enzymes may generate a characteristic repertoire of sugar-decorated proteoglycans that customize the cell coat and extracellular matrix.

## 2. Differential expression of transmitter and modulator receptors shapes input properties of GTPs

### Ionotropic GABA receptors (GABAARs)

Martinotti cells are considered “master regulators” that innervate most other cell types, including the distal dendrites of pyramidal neurons (Jiang et al., 2015). Yet they avoid themselves and receive relatively few inhibitory inputs, with the prominent exception of inhibition from VIP cells (Jiang et al., 2015; Pfeiffer et al., 2013). With highly limited subunit repertoire, we infer that SST/CR cells most likely receive VIP cell inputs through  $\alpha 3\beta 1/3\gamma 3$  type GABA<sub>A</sub>Rs.

Another major inhibitory mechanism is the dis-inhibitory module represented by interneuron selective VIP cells, which target predominantly Martinotti and to a less extent PV cells, but not themselves (Jiang et al., 2015; Pfeiffer et al., 2013; Pi et al., 2013). They receive relatively few local excitatory and inhibitory inputs, but are innervated by PV and SST cells (Jiang et al., 2015; Staiger et al., 1997). It is possible that  $\alpha 1$ -containing GABAARs mediate PV cell input whereas  $\alpha 3$ -containing GABA<sub>A</sub>Rs mediate Martinotti cell input.

## 3. Differential expression of signaling proteins in calcium, cyclic nucleotide and small GTPase 2nd messenger pathways customizes intracellular signaling in GTPs

### 3a. Ca<sup>2+</sup> binding proteins likely shapes spatiotemporal dynamics of Ca<sup>2+</sup> signaling

Many ligand-gated ion channels conduct Ca<sup>2+</sup>, a ubiquitous and versatile 2nd messenger, to trigger intracellular signaling (Brini et al., 2014; Burgoyne and Haynes, 2015). The spatial changes of intracellular Ca<sup>2+</sup> are often confined to micro- and nano-domains (Eggermann et al., 2011), as excess “free” Ca<sup>2+</sup> ions is cytotoxic; and the temporal dynamics of Ca signal ranges from micro-seconds to minutes, and from pulsatile to oscillatory (Bading, 2013; Dupont, 2014). These exquisite spatiotemporal patterns confer the specificity and potency of Ca<sup>2+</sup> signaling through a large variety of Ca<sup>2+</sup>-regulated enzymes and effectors (Brini et al., 2014). To a great extent, spatiotemporal Ca<sup>2+</sup> dynamics are shaped by a large set of Ca<sup>2+</sup>-binding and signaling proteins (CaBPs) (Burgoyne and Haynes, 2015). The mouse genome encodes ~170 EF-hand containing CaBPs with distinct binding affinities, kinetics and subcellular localization. Beyond the well characterized CaBPs as GABAergic markers (e.g. PV, calretinin, calbindin) (Kubota et al., 2011), the expression of most CaBPs in different neuronal cell types are unknown. We found that each GTP expresses a set of ~5-8 different CaBPs (Figure 5D). Many of these CaBPs are in fact signaling proteins (e.g. Rasgrp1 in ChCs). These results suggest that differential expression of multiple Ca<sup>2+</sup> binding and signaling proteins might shape distinct spatiotemporal dynamics and the specificity of Ca<sup>2+</sup>-signaling among GTPs.

### 3b. Adenylyl cyclase and phosphodiesterase isoforms may shape distinct cAMP signaling properties

GPCRs signal through G proteins, many of which engage cAMP - the archetypical 2nd messenger pathway. cAMP activates protein kinase A (PKA) which regulates effector proteins through

phosphorylation. The synthesis, degradation and spatiotemporal dynamics of cAMP are stringently regulated at each step (Halls and Cooper, 2011). First, different G $\alpha$  subunits either activate or inhibit different isoforms of adenylyl cyclases (ACs), which catalyze rapid cAMP synthesis; the activities of G $\alpha$  subunits are tightly controlled by a family of regulators of G protein signaling (RGS) (Gerber et al., 2016). In parallel, the equally rapid degradation of cAMP is mediated by a large family of phosphodiesterases (PDEs) with distinct catalytic and regulatory properties (Maurice et al., 2014). As brain tissues contain 10-fold greater PDE than AC activity (Schmidt, 2010), the intricate coordination of specific AC and PDE activities tightly controls the spatiotemporal changes of cAMP concentration (McCormick and Baillie, 2014). Importantly, different isoforms of ACs and PDEs localize to various subcellular compartments and further assemble into specific signaling complexes through binding to designated scaffolding proteins (e.g. A kinase adaptor proteins, or AKAPs), which recruit appropriated PKA isoforms and their particular target effectors (Edwards et al., 2012). These signaling complexes thus achieve exquisite specificity by presenting particular “flavors” of cAMP signal to specific effectors through physical proximity (McCormick and Baillie, 2014). The mouse genome contains 13 G $\alpha$ , 7 G $\beta$ , 12 G $\gamma$ , 23 RGSs, 9 ACs, 22 PDEs, 25 AKAPs, and 13 PKA subunits. The extent to which members of these signaling protein families are customized for specific neuronal cell types are unknown. Our computation screen and analysis revealed highly coordinated differential expression across these families of signaling proteins among GTPs.

### 3c. cGMP signaling modules in SST/nNOS and ChC

In contrast to cAMP, which serves as a ubiquitous 2nd messenger for vast number of extracellular ligands through hundreds of GPCRs, cGMP signaling in the brain is predominantly if not specifically triggered by nitric oxide (NO) (Lucas et al., 2010). NO is synthesized by neuronal nitric oxide synthase (nNOS) from L-arginine, which is acquired by neurons through specific amino acid transporters (Slc7a1-3) (Friebe and Koesling, 2003). In mature cortex, nNOS is expressed in subsets of GABAergic neurons, with high levels in a small set of SST+ long projection cells (LPCs, also type I nNOS cells) and much lower levels in several other populations (type II nNOS cells) (Perrenoud et al., 2012; Taniguchi et al., 2011). The major target of NO is the soluble form of guanylyl cyclase which catalyzes cGMP production. cGMP modulates the activity of cyclic nucleotide gated channels and PDE2/3, and engages protein kinase G (PKG) to regulate downstream effectors through phosphorylation (Friebe and Koesling, 2003). Although this general scheme is well established in brain tissues, whether and how NO and cGMP signaling is differentially implemented in different neuronal cell types is far from clear. We have found highly distinct mode of cGMP signaling among GTPs and discovered signaling modules in two bona-fide cell types (Figure 5A, E).

As the major effectors of PKG are ion channels, we screened through ion channels that are enriched in LPCs and ChCs (Figure S4) and searched for potential PKG targets by literature curation of their regulation by phosphorylation. We found at least two members of the Trp (transient receptor potential) channels and BK-type potassium channels that are differentially enriched in these two cell types and have been shown to be NO and PKG targets. The large conductance Ca- and voltage- activated potassium channels (BK-type) consist of a  $\alpha$ 1 core subunit and  $\beta$  auxiliary subunits. Channel activity is stimulated by PKG phosphorylation of the pore-forming  $\alpha$ 1 subunit (KCNMA1) (Alioua et al., 1998; Kyle et al., 2013; Zhou et al., 2001). We found co-expression of  $\alpha$ 1 and  $\beta$ 2 in ChCs, which assemble the fast activated and inactivating form (Wang et al., 2014), consistent with their fast electrophysiological properties. In contrast,

$\alpha 1$  and  $\beta 4$  are enriched in LPCs, which assemble the slow activated and non-inactivating form (Wang et al., 2014), consistent with their multiple slow forms electrophysiological properties. In the Trp family, Trpc6 is 6 times more permeable to  $\text{Ca}^{2+}$  than to  $\text{Na}^{+}$  and can activate transcriptional pathways involving calmodulin kinase IV (CAMKIV) and cAMP response element-binding protein (CREB) (Dietrich and Gudermann, 2014), while Trpc5 exhibits slightly higher permeability to  $\text{Ca}^{2+}$  over  $\text{Na}^{+}$  (Zholos, 2014). While Trpc6 is a PKG target (Takahashi et al., 2008) and is enriched in LPCs (Figure 5F), Trpc5 is directly activated by NO-mediated cysteines S-nitrosylation (Yoshida et al., 2006) and is enriched in ChC.

### 3d. Differential expression of Ras and Rho small GTPases

In addition to transmitters, modulators and hormones, cortical neurons respond to a diverse set of membrane bound or diffusible protein ligands that mediate cell-cell contacts and signaling through receptor tyrosine kinases (RTKs; Figure 5A). A key step of RTK signaling is mediated by a large set of Ras superfamily small GTPases, which play similar roles as classic 2nd messengers to activate multiple, specific kinase cascades that engage effectors (Alberts, 2014; Colicelli, 2004). As highly versatile molecular switches, small GTPases are activated by guanine nucleotide exchange factors (GEFs) and inactivated by GTPase activating proteins (GAPs) (Cherfils and Zeghouf, 2013). Within the Ras superfamily, only the Ras and Rho families relay membrane receptor signals, each family is regulated by a designated set of GEFs and GAPs (Cook et al., 2014; Vigil et al., 2010). Upon ligand activation, tyrosine phosphorylation in RTK cytoplasmic domain recruits specific adaptor proteins, which further assemble GEFs and GAPs to regulate Ras and Rho GTPases and engage kinase cascades (Alberts, 2014). Prominent among diverse effectors of the RTK pathways are transcription factors, which regulate gene expression (Ye and Carew, 2010), and cytoskeleton proteins that regulate cell shape, motility, adhesion and intracellular transport (Soderling, 2014).

The mammalian genome contains ~60 RTKs, over 90 SH2-SH3 adaptor proteins, ~30 Ras-GTPases and ~20 Rho-GTPases, and each set of GTPases is regulated by several dozens of GEFs and GAPs (HGNC; (Cherfils and Zeghouf, 2013). The diversity in these multi-layered and multi-family signaling proteins potentially supports a vast number of possible protein interactions and transduction cascades. A principle mechanism to achieve specificity and to customize the property of RTK signal transduction, elucidated mainly by studies in non-neuronal cells, is the assembly of signaling complexes where specific chains of protein interactions are organized by scaffolding proteins (Alberts, 2014). In the brain, however, whether RTK and Ras/Rho signaling are tailored to the needs and properties of different neuron types are unknown, in part due to a near absence of knowledge on their cellular expression patterns.

We found that members of the RTK family manifest significant differential expression among the 6 GABAergic populations (AUROC=0.74), suggesting that they might preferentially respond to different set of protein ligands. Downstream to RTKs, while multiple families of adaptor proteins (SH2 domain AUROC=0.69), GAPs (Rho-GAP AUROC=0.60; Arf-GAPs AUROC=0.65), kinases (AUROC: PI3Ks=0.61, MAPKKK=0.52, MAPKK=0.50, MAPK=0.57s) are more broadly expressed, the Ras and Rho signaling and regulatory proteins are differentially expressed among GTPs. Within the Ras family, 21 of the 32 members showed major enrichment in specific GTPs (AUROC=0.84). Different Ras family members might be activated by different upstream signals, have different cellular functions, and engage

different downstream effectors (Buday and Downward, 2008; Mitin et al., 2005). This result suggests that GTPs might use Ras isoforms to relay distinct external inputs and trigger appropriate transcription programs and other effectors that mediate long term cellular changes.

Furthermore, both the Rho-GTPases and Rho-GEFs are differentially expressed. 37 of the 57 Rho-GEFs (AURPC=0.82) and 14 of the 19 Rho-GTPases (AUROC=0.72) are enriched in specific GTPs (Figure 5D). As different Rho isoforms are often activated by designated GEFs (Cook et al., 2014), our results suggest that differential expression of Rho signaling and regulatory components might provide the mechanism and capacity to maintain the diversity of GABAergic neuron morphology, connectivity, and to support different forms of neurite and synaptic motility and plasticity.

#### **4. Transcription factor profiles register the developmental history and contribute to the maintenance of GTP phenotypes**

##### **GABAergic neurons retain a transcription resume that registers their developmental history**

The embryonic subpallium contains a developmental plan embedded in progenitors along ganglionic eminence whereby transcription cascades orchestrate the specification and differentiation of major clades (i.e. MGE, CGE) of cortical GABAergic neurons (Kepecs and Fishell, 2014; Nord et al., 2015) (Figure 7A-B). In response to early morphogen gradients, subpallium progenitors acquire a transcription program involving *Gsx1/2*, *Zeb2*, *Ascl1* and *Dlx1/2*, which confers GABAergic fate. Subsequently, *Nkx2.1* defines the MGE lineage and *Coup-TFII* the CGE lineage (Kepecs and Fishell, 2014; Nord et al., 2015). Along the MGE lineage, *Lhx6* is a direct target of *Nkx2.1* and acts in postmitotic neuronal precursors to trigger subsequent transcription programs that guide migration, differentiation and maturation (Du et al., 2008; Zhao et al., 2008). Downstream TFs include: *Mafb*, a early marker of MGE postmitotic precursors (McKinsey et al., 2013); *Sox6*, which regulates the positioning and maturation of PV and SST cells (Azim et al., 2009; Batista-Brito et al., 2008); and *Satb1*, an activity-modulated chromatin regulator required for the terminal differentiation and connectivity of interneurons (Close et al., 2012; Denaxa et al., 2012). Along the CGE lineage, *Coup-TFII*, *Sp8* and *Prox1*, *Npas1*, *Npas3* contribute to the specification and differentiation of this major interneuron clade (Lodato et al., 2011; Ma et al., 2012; Miyoshi et al., 2015; Stanco et al., 2014). Several studies reported that these “embryonic TFs” are also expressed in subsets of mature cortical GABAergic neurons (Batista-Brito et al., 2008; Close et al., 2012; Miyazaki et al., 2012; Touzot et al., 2016). However, whether the expression patterns of these developmental TFs in mature cortex maintain their developmental history and the extent to which other TFs show similar “developmental continuity” are unclear.

By hierarchical and pair-wise comparison, we defined multiple sets of TFs that distinguish PV vs SST population (Figure 7F), and ChC vs PV, SST/nNOS vs SST/CR, and VIP/CR vs VIP/CCK cells (Figure 7G). Again, in cases where the developmental expression are reported there is a consistent developmental continuity of TF expression from embryonic precursors to mature neurons (e.g. *ssbp2*, *Npas3*, *Bcl11*) (Batista-Brito et al., 2008; Nikouei et al., 2016). In addition, by screening the Allen Atlas, we found that *Klf5*, *Lmo4*, *Bcl11a* (in SST cells), *Pou3f2*, *Hey1* (in SST/nNOS cells) and *Sox15* (in SST/CR cells) are expressed in embryonic ganglionic eminence neuronal progenitors and/or precursors (Figure S7B).

## Supplemental Text References

- Alberts, B., Johnson, A., Lewis, J., Morgan, D., Raff, M., Roberts, K., Walter, P., (2014). Cell Signaling. Molecular Biology of the Cell *Chapter 15*.
- Alioua, A., Tanaka, Y., Wallner, M., Hofmann, F., Ruth, P., Meera, P., and Toro, L. (1998). The large conductance, voltage-dependent, and calcium-sensitive K<sup>+</sup> channel, Hslo, is a target of cGMP-dependent protein kinase phosphorylation in vivo. The Journal of biological chemistry *273*, 32950-32956.
- Azim, E., Jabaudon, D., Fame, R.M., and Macklis, J.D. (2009). SOX6 controls dorsal progenitor identity and interneuron diversity during neocortical development. Nature neuroscience *12*, 1238-1247.
- Bading, H. (2013). Nuclear calcium signalling in the regulation of brain function. Nature reviews Neuroscience *14*, 593-608.
- Batista-Brito, R., Machold, R., Klein, C., and Fishell, G. (2008). Gene expression in cortical interneuron precursors is prescient of their mature function. Cerebral cortex *18*, 2306-2317.
- Brini, M., Cali, T., Ottolini, D., and Carafoli, E. (2014). Neuronal calcium signaling: function and dysfunction. Cellular and molecular life sciences : CMLS *71*, 2787-2814.
- Burgoyne, R.D., and Haynes, L.P. (2015). Sense and specificity in neuronal calcium signalling. Biochimica et biophysica acta *1853*, 1921-1932.
- Cherfils, J., and Zeghouf, M. (2013). Regulation of small GTPases by GEFs, GAPs, and GDIs. Physiological reviews *93*, 269-309.
- Close, J., Xu, H., De Marco Garcia, N., Batista-Brito, R., Rossignol, E., Rudy, B., and Fishell, G. (2012). Satb1 is an activity-modulated transcription factor required for the terminal differentiation and connectivity of medial ganglionic eminence-derived cortical interneurons. The Journal of neuroscience : the official journal of the Society for Neuroscience *32*, 17690-17705.
- Colicelli, J. (2004). Human RAS superfamily proteins and related GTPases. Science's STKE : signal transduction knowledge environment *2004*, RE13.
- Cook, D.R., Rossman, K.L., and Der, C.J. (2014). Rho guanine nucleotide exchange factors: regulators of Rho GTPase activity in development and disease. Oncogene *33*, 4021-4035.
- Denaxa, M., Kalaitzidou, M., Garefalaki, A., Achimastou, A., Lasrado, R., Maes, T., and Pachnis, V. (2012). Maturation-promoting activity of SATB1 in MGE-derived cortical interneurons. Cell reports *2*, 1351-1362.
- Dietrich, A., and Gudermann, T. (2014). TRPC6: physiological function and pathophysiological relevance. Handbook of experimental pharmacology *222*, 157-188.
- Du, T., Xu, Q., Ocbina, P.J., and Anderson, S.A. (2008). NKX2.1 specifies cortical interneuron fate by activating Lhx6. Development *135*, 1559-1567.
- Dupont, G. (2014). Modeling the intracellular organization of calcium signaling. Wiley interdisciplinary reviews Systems biology and medicine *6*, 227-237.
- Edwards, H.V., Christian, F., and Baillie, G.S. (2012). cAMP: novel concepts in compartmentalised signalling. Seminars in cell & developmental biology *23*, 181-190.
- Eggermann, E., Bucurenciu, I., Goswami, S.P., and Jonas, P. (2011). Nanodomain coupling between Ca<sup>2+</sup>(+) channels and sensors of exocytosis at fast mammalian synapses. Nature reviews Neuroscience *13*, 7-21.
- Friebe, A., and Koesling, D. (2003). Regulation of nitric oxide-sensitive guanylyl cyclase. Circulation research *93*, 96-105.
- Gerber, K.J., Squires, K.E., and Hepler, J.R. (2016). Roles for Regulator of G Protein Signaling Proteins in Synaptic Signaling and Plasticity. Molecular pharmacology *89*, 273-286.
- Halls, M.L., and Cooper, D.M. (2011). Regulation by Ca<sup>2+</sup>-signaling pathways of adenylyl cyclases. Cold Spring Harbor perspectives in biology *3*, a004143.

- Hashimshony, T., Wagner, F., Sher, N., and Yanai, I. (2012). CEL-Seq: single-cell RNA-Seq by multiplexed linear amplification. *Cell reports* 2, 666-673.
- Jaitin, D.A., Kenigsberg, E., Keren-Shaul, H., Elefant, N., Paul, F., Zaretsky, I., Mildner, A., Cohen, N., Jung, S., Tanay, A., *et al.* (2014). Massively parallel single-cell RNA-seq for marker-free decomposition of tissues into cell types. *Science* 343, 776-779.
- Jiang, X., Shen, S., Cadwell, C.R., Berens, P., Sinz, F., Ecker, A.S., Patel, S., and Tolias, A.S. (2015). Principles of connectivity among morphologically defined cell types in adult neocortex. *Science* 350, aac9462.
- Kepecs, A., and Fishell, G. (2014). Interneuron cell types are fit to function. *Nature* 505, 318-326.
- Kubota, Y., Shigematsu, N., Karube, F., Sekigawa, A., Kato, S., Yamaguchi, N., Hirai, Y., Morishima, M., and Kawaguchi, Y. (2011). Selective coexpression of multiple chemical markers defines discrete populations of neocortical GABAergic neurons. *Cerebral cortex* 21, 1803-1817.
- Kyle, B.D., Hurst, S., Swayze, R.D., Sheng, J., and Braun, A.P. (2013). Specific phosphorylation sites underlie the stimulation of a large conductance, Ca(2+)-activated K(+) channel by cGMP-dependent protein kinase. *FASEB journal : official publication of the Federation of American Societies for Experimental Biology* 27, 2027-2038.
- Lee, J.S., and Chien, C.B. (2004). When sugars guide axons: insights from heparan sulphate proteoglycan mutants. *Nature reviews Genetics* 5, 923-935.
- Lodato, S., Tomassy, G.S., De Leonibus, E., Uzcategui, Y.G., Andolfi, G., Armentano, M., Touzot, A., Gaztelu, J.M., Arlotta, P., Menendez de la Prida, L., *et al.* (2011). Loss of COUP-TFI alters the balance between caudal ganglionic eminence- and medial ganglionic eminence-derived cortical interneurons and results in resistance to epilepsy. *The Journal of neuroscience : the official journal of the Society for Neuroscience* 31, 4650-4662.
- Lucas, E.K., Markwardt, S.J., Gupta, S., Meador-Woodruff, J.H., Lin, J.D., Overstreet-Wadiche, L., and Cowell, R.M. (2010). Parvalbumin deficiency and GABAergic dysfunction in mice lacking PGC-1alpha. *The Journal of neuroscience : the official journal of the Society for Neuroscience* 30, 7227-7235.
- Ma, T., Zhang, Q., Cai, Y., You, Y., Rubenstein, J.L., and Yang, Z. (2012). A subpopulation of dorsal lateral/caudal ganglionic eminence-derived neocortical interneurons expresses the transcription factor Sp8. *Cerebral cortex* 22, 2120-2130.
- Matthews, R.T., Kelly, G.M., Zerillo, C.A., Gray, G., Tiemeyer, M., and Hockfield, S. (2002). Aggrecan glycoforms contribute to the molecular heterogeneity of perineuronal nets. *The Journal of neuroscience : the official journal of the Society for Neuroscience* 22, 7536-7547.
- Maurice, D.H., Ke, H., Ahmad, F., Wang, Y., Chung, J., and Manganiello, V.C. (2014). Advances in targeting cyclic nucleotide phosphodiesterases. *Nature reviews Drug discovery* 13, 290-314.
- McCormick, K., and Baillie, G.S. (2014). Compartmentalisation of second messenger signalling pathways. *Current opinion in genetics & development* 27, 20-25.
- McKinsey, G.L., Lindtner, S., Trzcinski, B., Visel, A., Pennacchio, L.A., Huylebroeck, D., Higashi, Y., and Rubenstein, J.L. (2013). Dlx1&2-dependent expression of Zfhx1b (Sip1, Zeb2) regulates the fate switch between cortical and striatal interneurons. *Neuron* 77, 83-98.
- Miyata, S., and Kitagawa, H. (2016a). Chondroitin 6-Sulfation Regulates Perineuronal Net Formation by Controlling the Stability of Aggrecan. *Neural plasticity* 2016, 1305801.
- Miyata, S., and Kitagawa, H. (2016b). Chondroitin sulfate and neuronal disorders. *Frontiers in bioscience* 21, 1330-1340.
- Miyata, S., Komatsu, Y., Yoshimura, Y., Taya, C., and Kitagawa, H. (2012). Persistent cortical plasticity by upregulation of chondroitin 6-sulfation. *Nature neuroscience* 15, 414-422, S411-412.
- Miyazaki, T., Takase, K., Nakajima, W., Tada, H., Ohya, D., Sano, A., Goto, T., Hirase, H., Malinow, R., and Takahashi, T. (2012). Disrupted cortical function underlies behavior dysfunction due to social isolation. *The Journal of clinical investigation* 122, 2690-2701.
- Miyoshi, G., Young, A., Petros, T., Karayannis, T., McKenzie Chang, M., Lavado, A., Iwano, T., Nakajima, M., Taniguchi, H., Huang, Z.J., *et al.* (2015). Prox1 Regulates the Subtype-Specific Development



- of Caudal Ganglionic Eminence-Derived GABAergic Cortical Interneurons. *The Journal of neuroscience : the official journal of the Society for Neuroscience* 35, 12869-12889.
- Nikouei, K., Munoz-Manchado, A.B., and Hjerling-Lefler, J. (2016). BCL11B/CTIP2 is highly expressed in GABAergic interneurons of the mouse somatosensory cortex. *Journal of chemical neuroanatomy* 71, 1-5.
- Nord, A.S., Pattabiraman, K., Visel, A., and Rubenstein, J.L. (2015). Genomic perspectives of transcriptional regulation in forebrain development. *Neuron* 85, 27-47.
- Paul, A., Cai, Y., Atwal, G.S., and Huang, Z.J. (2012). Developmental Coordination of Gene Expression between Synaptic Partners During GABAergic Circuit Assembly in Cerebellar Cortex. *Frontiers in neural circuits* 6, 37.
- Perrenoud, Q., Geoffroy, H., Gauthier, B., Rancillac, A., Alfonsi, F., Kessar, N., Rossier, J., Vitalis, T., and Gallopin, T. (2012). Characterization of Type I and Type II nNOS-Expressing Interneurons in the Barrel Cortex of Mouse. *Frontiers in neural circuits* 6, 36.
- Pfeffer, C.K., Xue, M., He, M., Huang, Z.J., and Scanziani, M. (2013). Inhibition of inhibition in visual cortex: the logic of connections between molecularly distinct interneurons. *Nature neuroscience* 16, 1068-1076.
- Pi, H.J., Hangya, B., Kvitsiani, D., Sanders, J.I., Huang, Z.J., and Kepecs, A. (2013). Cortical interneurons that specialize in disinhibitory control. *Nature* 503, 521-524.
- Pizzorusso, T., Medini, P., Berardi, N., Chierzi, S., Fawcett, J.W., and Maffei, L. (2002). Reactivation of ocular dominance plasticity in the adult visual cortex. *Science* 298, 1248-1251.
- Sarrazin, S., Lamanna, W.C., and Esko, J.D. (2011). Heparan sulfate proteoglycans. *Cold Spring Harbor perspectives in biology* 3.
- Schmidt, C.J. (2010). Phosphodiesterase inhibitors as potential cognition enhancing agents. *Current topics in medicinal chemistry* 10, 222-230.
- Schnaar, R.L., Gerardy-Schahn, R., and Hildebrandt, H. (2014). Sialic acids in the brain: gangliosides and polysialic acid in nervous system development, stability, disease, and regeneration. *Physiological reviews* 94, 461-518.
- Smith, P.D., Coulson-Thomas, V.J., Foscarin, S., Kwok, J.C., and Fawcett, J.W. (2015). "GAG-ing with the neuron": The role of glycosaminoglycan patterning in the central nervous system. *Experimental neurology* 274, 100-114.
- Soderling, S.H., Van Aelst, L. (2014). Principles driving the spatial organization of Rho GTPase signaling at synapses. A Wittinghofer (ed), *Ras Superfamily Small G Proteins: Biology and Mechanisms Springer-Verlag Wien 2014*.
- Staiger, J.F., Freund, T.F., and Zilles, K. (1997). Interneurons immunoreactive for vasoactive intestinal polypeptide (VIP) are extensively innervated by parvalbumin-containing boutons in rat primary somatosensory cortex. *The European journal of neuroscience* 9, 2259-2268.
- Stanco, A., Pla, R., Vogt, D., Chen, Y., Mandal, S., Walker, J., Hunt, R.F., Lindtner, S., Erdman, C.A., Pieper, A.A., *et al.* (2014). NPAS1 represses the generation of specific subtypes of cortical interneurons. *Neuron* 84, 940-953.
- Sugino, K., Hempel, C.M., Miller, M.N., Hattox, A.M., Shapiro, P., Wu, C., Huang, Z.J., and Nelson, S.B. (2006). Molecular taxonomy of major neuronal classes in the adult mouse forebrain. *Nature neuroscience* 9, 99-107.
- Takahashi, S., Lin, H., Geshi, N., Mori, Y., Kawarabayashi, Y., Takami, N., Mori, M.X., Honda, A., and Inoue, R. (2008). Nitric oxide-cGMP-protein kinase G pathway negatively regulates vascular transient receptor potential channel TRPC6. *The Journal of physiology* 586, 4209-4223.
- Taniguchi, H., He, M., Wu, P., Kim, S., Paik, R., Sugino, K., Kvitsiani, D., Fu, Y., Lu, J., Lin, Y., *et al.* (2011). A resource of Cre driver lines for genetic targeting of GABAergic neurons in cerebral cortex. *Neuron* 71, 995-1013.

- Touzot, A., Ruiz-Reig, N., Vitalis, T., and Studer, M. (2016). Molecular control of two novel migratory paths for CGE-derived interneurons in the developing mouse brain. *Development* *143*, 1753-1765.
- Vigil, D., Cherfils, J., Rossman, K.L., and Der, C.J. (2010). Ras superfamily GEFs and GAPs: validated and tractable targets for cancer therapy? *Nature reviews Cancer* *10*, 842-857.
- Wang, B., Jaffe, D.B., and Brenner, R. (2014). Current understanding of iberiotoxin-resistant BK channels in the nervous system. *Frontiers in physiology* *5*, 382.
- Ye, X., and Carew, T.J. (2010). Small G protein signaling in neuronal plasticity and memory formation: the specific role of ras family proteins. *Neuron* *68*, 340-361.
- Yoshida, T., Inoue, R., Morii, T., Takahashi, N., Yamamoto, S., Hara, Y., Tominaga, M., Shimizu, S., Sato, Y., and Mori, Y. (2006). Nitric oxide activates TRP channels by cysteine S-nitrosylation. *Nature chemical biology* *2*, 596-607.
- Zhao, Y., Flandin, P., Long, J.E., Cuesta, M.D., Westphal, H., and Rubenstein, J.L. (2008). Distinct molecular pathways for development of telencephalic interneuron subtypes revealed through analysis of Lhx6 mutants. *The Journal of comparative neurology* *510*, 79-99.
- Zholos, A.V. (2014). Trpc5. *Handbook of experimental pharmacology* *222*, 129-156.
- Zhou, X.B., Arntz, C., Kamm, S., Motejlek, K., Sausbier, U., Wang, G.X., Ruth, P., and Korth, M. (2001). A molecular switch for specific stimulation of the BKCa channel by cGMP and cAMP kinase. *The Journal of biological chemistry* *276*, 43239-43245.
